# Supplementary material for: Evaluating the effect of spaceflight on the host–pathogen interaction between human intestinal epithelial cells and Salmonella Typhimurium
Source: PubMed Central journal article supplement (PMC7943786; doi:10.1038/s41526-021-00136-w), 2021-03-09
Supplement: 41526_2021_136_MOESM1_ESM.pdf [file 41526_2021_136_MOESM1_ESM.pdf]

## Supplementary Tables 1 to 11

### Evaluating the effect of spaceflight on the host-pathogen interaction between human intestinal epithelial cells and *Salmonella* Typhimurium

Jennifer Barrila, Shameema F. Sarker, Nicole Hansmeier, Shanshan Yang, Kristina Buss, Natalia Briones, Jin Park, Richard R. Davis, Rebecca J. Forsyth, C. Mark Ott, Kevin Sato, Cristine Kosnik, Anthony Yang, Cheryl Shimoda, Nicole Rayl, Diana Ly, Aaron Landenberger, Stephanie D. Wilson, Naoko Yamazaki, Jason Steel, Camila Montano, Rolf U. Halden, Tom Cannon, Sarah L. Castro-Wallace and Cheryl A. Nickerson

This document contains Supplementary Tables 1 through 11. Titles contain an active link to bring the reader to the appropriate starting page for each table.

**Supplementary Table 1.** Differentially expressed genes in uninfected Flight versus uninfected Ground HT-29 cultures (pp. 2-6)

**Supplementary Table 2.** Enrichment analysis of uninfected Flight versus uninfected Ground HT-29 cultures (p. 7)

**Supplementary Table 3.** Differentially expressed host proteins in STL-IMMUNE (p. 8)

**Supplementary Table 4.** Differentially expressed host genes in Flight infected vs uninfected cultures (pp. 9-10)

**Supplementary Table 5.** Enrichment analysis of Flight HT-29 cultures: infected versus uninfected (pp. 11-12)

**Supplementary Table 6.** Differentially expressed host genes in Ground infected vs uninfected cultures (pp. 13-19)

**Supplementary Table 7.** Enrichment analysis of Ground HT-29 cultures: infected versus uninfected (pp. 20-22)

**Supplementary Table 8.** Differentially expressed host genes in infected Flight vs infected Ground cultures (pp. 23-31)

**Supplementary Table 9.** Bacterial transcripts expressed in infected Flight HT-29 cultures (pp. 32-39)

**Supplementary Table 10.** Bacterial transcripts expressed in infected Ground HT-29 cultures (pp. 40-41)

**Supplementary Table 11.** Differential expression of bacterial transcripts between infected Flight and infected Ground HT-29 cultures (pp. 42-47)

**Supplementary Table 1. Differentially expressed genes in uninfected Flight versus uninfected Ground HT-29 cultures<sup>1</sup>**

| Gene                             | Description                                                                     | Fold Change | FDR         |
|----------------------------------|---------------------------------------------------------------------------------|-------------|-------------|
| <b>Upregulated genes (45)</b>    |                                                                                 |             |             |
| <i>KLHL23</i>                    | kelch like family member 23                                                     | 101.726     | 0.000271233 |
| <i>BIVM-ERCC5</i>                | BIVM-ERCC5 readthrough                                                          | 85.544      | 6.51E-05    |
| <i>SLMO2-ATP5E</i>               | SLMO2-ATP5E readthrough                                                         | 85.085      | 0.001528544 |
| <i>JMJD7-PLA2G4B</i>             | JMJD7-PLA2G4B readthrough                                                       | 83.792      | 0.009568089 |
| <i>HSPE1-MOB4</i>                | HSPE1-MOB4 readthrough                                                          | 73.870      | 0.019503319 |
| <i>UGT1A5</i>                    | UDP glucuronosyltransferase family 1 member A5                                  | 66.273      | 0.006721232 |
| <i>RPL36A-HNRNPH2</i>            | RPL36A-HNRNPH2 readthrough                                                      | 63.359      | 0.012933521 |
| <i>NPHP3-ACAD11</i>              | NPHP3-ACAD11 readthrough (NMD candidate)                                        | 56.357      | 0.02377648  |
| <i>IFNL1</i>                     | interferon lambda 1                                                             | 15.737      | 0.03985838  |
| <i>SPRR3</i>                     | small proline rich protein 3                                                    | 5.626       | 7.93E-16    |
| <i>SPRR1B</i>                    | small proline rich protein 1B                                                   | 3.672       | 2.85E-10    |
| <i>SPRR1A</i>                    | small proline rich protein 1A                                                   | 3.438       | 2.24E-05    |
| <i>DHRS9</i>                     | dehydrogenase/reductase 9                                                       | 3.215       | 3.40E-07    |
| <i>MCM10</i>                     | minichromosome maintenance 10 replication initiation factor                     | 2.957       | 0.022862199 |
| <i>ADAM19</i>                    | ADAM metallopeptidase domain 19                                                 | 2.742       | 0.015984152 |
| <i>TACSTD2</i>                   | tumor-associated calcium signal transducer 2                                    | 2.664       | 3.06E-05    |
| <i>WFDC2</i>                     | WAP four-disulfide core domain 2                                                | 2.598       | 4.93E-05    |
| <i>RSAD2</i>                     | radical S-adenosyl methionine domain containing 2                               | 2.589       | 0.001648149 |
| <i>CLSPN</i>                     | claspin                                                                         | 2.481       | 0.00030744  |
| <i>CD3EAP</i>                    | CD3e molecule associated protein                                                | 2.392       | 0.000522717 |
| <i>CCNA2</i>                     | cyclin A2                                                                       | 2.341       | 0.004397226 |
| <i>RRM2</i>                      | ribonucleotide reductase regulatory subunit M2                                  | 2.338       | 0.000723169 |
| <i>KIAA0101</i>                  | KIAA0101                                                                        | 2.329       | 0.006721232 |
| <i>SAMHD1</i>                    | SAM and HD domain containing deoxynucleoside triphosphate triphosphohydrolase 1 | 2.304       | 0.005688177 |
| <i>BRCA1</i>                     | BRCA1, DNA repair associated                                                    | 2.269       | 0.002190685 |
| <i>SH3TC2</i>                    | SH3 domain and tetratricopeptide repeats 2                                      | 2.230       | 0.001391707 |
| <i>WDR62</i>                     | WD repeat domain 62                                                             | 2.223       | 0.017315084 |
| <i>ZNF185</i>                    | zinc finger protein 185 (LIM domain)                                            | 2.222       | 0.00117612  |
| <i>ADGRF1</i>                    | adhesion G protein-coupled receptor F1                                          | 2.215       | 0.001392283 |
| <i>TREML2</i>                    | triggering receptor expressed on myeloid cells like 2                           | 2.213       | 0.010207079 |
| <i>LAMC2</i>                     | laminin subunit gamma 2                                                         | 2.193       | 0.001421026 |
| <i>OAS3</i>                      | 2'-5'-oligoadenylate synthetase 3                                               | 2.191       | 0.005227343 |
| <i>LOC107985741</i>              | uncharacterized LOC107985741                                                    | 2.159       | 0.009568089 |
| <i>IFI30</i>                     | IFI30, lysosomal thiol reductase                                                | 2.144       | 0.045805938 |
| <i>SECTM1</i>                    | secreted and transmembrane 1                                                    | 2.116       | 0.003633792 |
| <i>EREG</i>                      | epiregulin                                                                      | 2.095       | 0.011885583 |
| <i>KLK6</i>                      | kallikrein related peptidase 6                                                  | 2.092       | 0.009443983 |
| <i>GRHL3</i>                     | grainyhead like transcription factor 3                                          | 2.091       | 0.02254808  |
| <i>MX1</i>                       | MX dynamin like GTPase 1                                                        | 2.054       | 0.008015452 |
| <i>OASL</i>                      | 2'-5'-oligoadenylate synthetase like                                            | 2.050       | 0.006942525 |
| <i>LOXL4</i>                     | lysyl oxidase like 4                                                            | 2.045       | 0.007140929 |
| <i>SULT2B1</i>                   | sulfotransferase family 2B member 1                                             | 2.033       | 0.008694672 |
| <i>DPP4</i>                      | dipeptidyl peptidase 4                                                          | 2.026       | 0.016357368 |
| <i>GTF2A2</i>                    | general transcription factor IIA subunit 2                                      | 2.022       | 0.011996017 |
| <i>CCAT1</i>                     | colon cancer associated transcript 1 (non-protein coding)                       | 2.010       | 0.013816545 |
| <b>Downregulated genes (262)</b> |                                                                                 |             |             |
| <i>TSC22D3</i>                   | TSC22 domain family member 3                                                    | -2.005      | 0.028211759 |
| <i>PDCD4</i>                     | programmed cell death 4 (neoplastic transformation inhibitor)                   | -2.014      | 0.023699402 |
| <i>NOL3</i>                      | nucleolar protein 3                                                             | -2.023      | 0.022862199 |
| <i>TBC1D8</i>                    | TBC1 domain family member 8                                                     | -2.042      | 0.028246061 |
| <i>DUSP4</i>                     | dual specificity phosphatase 4                                                  | -2.044      | 0.008015452 |
| <i>KLHDC7A</i>                   | kelch domain containing 7A                                                      | -2.044      | 0.022754382 |
| <i>SREBF1</i>                    | sterol regulatory element binding transcription factor 1                        | -2.050      | 0.007471623 |
| <i>ANO9</i>                      | anoctamin 9                                                                     | -2.069      | 0.019062096 |
| <i>ARSD</i>                      | arylsulfatase D                                                                 | -2.076      | 0.006153623 |
| <i>DENND5B</i>                   | DENN domain containing 5B                                                       | -2.085      | 0.0058557   |

|                     |                                                                 |        |             |
|---------------------|-----------------------------------------------------------------|--------|-------------|
| <i>HK2</i>          | hexokinase 2                                                    | -2.089 | 0.00435589  |
| <i>METTL12</i>      | methyltransferase like 12                                       | -2.096 | 0.0129733   |
| <i>TNS3</i>         | tensin 3                                                        | -2.101 | 0.003526686 |
| <i>MYRF</i>         | myelin regulatory factor                                        | -2.110 | 0.005682348 |
| <i>CD24</i>         | CD24 molecule                                                   | -2.113 | 0.004397226 |
| <i>TSPAN12</i>      | tetraspanin 12                                                  | -2.121 | 0.01112855  |
| <i>C6orf223</i>     | chromosome 6 open reading frame 223                             | -2.149 | 0.004183485 |
| <i>ANKZF1</i>       | ankyrin repeat and zinc finger domain containing 1              | -2.156 | 0.007822103 |
| <i>QPRT</i>         | quinolinate phosphoribosyltransferase                           | -2.161 | 0.00538341  |
| <i>CAMK2N1</i>      | calcium/calmodulin dependent protein kinase II inhibitor 1      | -2.163 | 0.004351272 |
| <i>IGFBP4</i>       | insulin like growth factor binding protein 4                    | -2.169 | 0.003117576 |
| <i>AK4</i>          | adenylate kinase 4                                              | -2.176 | 0.018424967 |
| <i>NAALADL2</i>     | N-acetylated alpha-linked acidic dipeptidase like 2             | -2.196 | 0.007636672 |
| <i>EPS8L3</i>       | EPS8 like 3                                                     | -2.197 | 0.005679925 |
| <i>NYNRIN</i>       | NYN domain and retroviral integrase containing                  | -2.221 | 0.001332708 |
| <i>MYOM3</i>        | myomesin 3                                                      | -2.243 | 0.009568089 |
| <i>PTPRJ</i>        | protein tyrosine phosphatase, receptor type J                   | -2.253 | 0.001336869 |
| <i>KDM4B</i>        | lysine demethylase 4B                                           | -2.269 | 0.007471623 |
| <i>HOXB3</i>        | homeobox B3                                                     | -2.272 | 0.002169876 |
| <i>HOXA3</i>        | homeobox A3                                                     | -2.303 | 0.01617281  |
| <i>SLC25A29</i>     | solute carrier family 25 member 29                              | -2.321 | 0.000710704 |
| <i>ARHGEF17</i>     | Rho guanine nucleotide exchange factor 17                       | -2.322 | 0.011298087 |
| <i>SNORA53</i>      | small nucleolar RNA, H/ACA box 53                               | -2.351 | 0.035909394 |
| <i>GAPDHP1</i>      | glyceraldehyde-3-phosphate dehydrogenase pseudogene 1           | -2.392 | 0.002877052 |
| <i>BNIP3L</i>       | BCL2 interacting protein 3 like                                 | -2.437 | 0.002025497 |
| <i>UGT1A9</i>       | UDP glucuronosyltransferase family 1 member A9                  | -2.538 | 0.012910824 |
| <i>FAM83E</i>       | family with sequence similarity 83 member E                     | -2.551 | 6.82E-05    |
| <i>TPM2</i>         | tropomyosin 2 (beta)                                            | -2.552 | 0.004907446 |
| <i>TCN2</i>         | transcobalamin 2                                                | -2.556 | 0.001392283 |
| <i>RIN2</i>         | Ras and Rab interactor 2                                        | -2.558 | 0.005510304 |
| <i>FREM2</i>        | FRAS1 related extracellular matrix protein 2                    | -2.596 | 0.001648149 |
| <i>AGFG2</i>        | ArfGAP with FG repeats                                          | -2.615 | 0.00221063  |
| <i>TSPAN9</i>       | tetraspanin 9                                                   | -2.623 | 0.002636918 |
| <i>HNF4A</i>        | hepatocyte nuclear factor 4 alpha                               | -2.648 | 0.02414016  |
| <i>SLC40A1</i>      | solute carrier family 40 member 1                               | -2.660 | 1.55E-05    |
| <i>SEMA4G</i>       | semaphorin 4G                                                   | -2.723 | 6.02E-06    |
| <i>MYADM</i>        | myeloid associated differentiation marker                       | -2.745 | 0.008045139 |
| <i>PKD1</i>         | pyruvate dehydrogenase kinase 1                                 | -2.767 | 2.79E-05    |
| <i>BTD</i>          | biotinidase                                                     | -2.775 | 0.044183093 |
| <i>SH3PXD2A</i>     | SH3 and PX domains 2A                                           | -2.787 | 0.009043447 |
| <i>PDE4D</i>        | phosphodiesterase 4D                                            | -2.811 | 0.000116127 |
| <i>ECHDC2</i>       | enoyl-CoA hydratase domain containing 2                         | -2.819 | 0.000908827 |
| <i>CEACAM6</i>      | carcinoembryonic antigen related cell adhesion molecule 6       | -2.866 | 1.15E-06    |
| <i>HGD</i>          | homogentisate 1,2-dioxygenase                                   | -2.894 | 0.026446937 |
| <i>LOC107987206</i> | uncharacterized LOC107987206                                    | -2.902 | 2.05E-06    |
| <i>DPYSL2</i>       | dihydropyrimidinase like 2                                      | -2.913 | 8.08E-05    |
| <i>PFKFB3</i>       | 6-phosphofructo-2-kinase/fructose-2,6-biphosphatase 3           | -2.917 | 3.40E-07    |
| <i>ENO2</i>         | enolase 2                                                       | -2.931 | 1.44E-06    |
| <i>ABCG1</i>        | ATP binding cassette subfamily G member 1                       | -2.938 | 0.005560988 |
| <i>AGR2</i>         | anterior gradient 2, protein disulphide isomerase family member | -2.955 | 4.22E-07    |
| <i>F2R</i>          | coagulation factor II thrombin receptor                         | -2.970 | 0.007471623 |
| <i>ANO1</i>         | anoctamin 1                                                     | -3.020 | 0.002874584 |
| <i>CLEC3A</i>       | C-type lectin domain family 3 member A                          | -3.060 | 1.13E-06    |
| <i>EHHADH</i>       | enoyl-CoA hydratase and 3-hydroxyacyl CoA dehydrogenase         | -3.120 | 0.038336674 |
| <i>PRKCA</i>        | protein kinase C alpha                                          | -3.194 | 3.88E-08    |
| <i>VILI</i>         | villin 1                                                        | -3.213 | 8.36E-08    |
| <i>USH1C</i>        | USH1 protein network component harmonin                         | -3.230 | 2.63E-08    |
| <i>PROM1</i>        | prominin 1                                                      | -3.270 | 2.19E-05    |
| <i>MUC13</i>        | mucin 13, cell surface associated                               | -3.302 | 2.17E-08    |
| <i>DMTN</i>         | dematin actin binding protein                                   | -3.329 | 0.00088236  |
| <i>TSPAN8</i>       | tetraspanin 8                                                   | -3.386 | 3.69E-06    |
| <i>CA12</i>         | carbonic anhydrase 12                                           | -3.414 | 2.88E-09    |
| <i>ROR1</i>         | receptor tyrosine kinase like orphan receptor 1                 | -3.416 | 0.000387615 |
| <i>PTPRO</i>        | protein tyrosine phosphatase, receptor type O                   | -3.421 | 0.005286392 |
| <i>F5</i>           | coagulation factor V                                            | -3.454 | 1.70E-08    |
| <i>CFTR</i>         | cystic fibrosis transmembrane conductance regulator             | -3.459 | 3.26E-08    |

|                     |                                                                            |        |             |
|---------------------|----------------------------------------------------------------------------|--------|-------------|
| <i>CLMN</i>         | calmin                                                                     | -3.467 | 8.65E-08    |
| <i>IGF2</i>         | insulin like growth factor 2                                               | -3.495 | 0.001551811 |
| <i>ALDH3A1</i>      | aldehyde dehydrogenase 3 family member A1                                  | -3.517 | 2.69E-09    |
| <i>PHGR1</i>        | proline, histidine and glycine rich 1                                      | -3.545 | 5.40E-05    |
| <i>FAM13A</i>       | family with sequence similarity 13 member A                                | -3.548 | 1.13E-06    |
| <i>RBPM5</i>        | RNA binding protein with multiple splicing                                 | -3.550 | 0.004986765 |
| <i>GDA</i>          | guanine deaminase                                                          | -3.560 | 0.007119424 |
| <i>FADS1</i>        | fatty acid desaturase 1                                                    | -3.618 | 0.002311488 |
| <i>CDK18</i>        | cyclin dependent kinase 18                                                 | -3.654 | 5.56E-07    |
| <i>MYRFL</i>        | myelin regulatory factor-like                                              | -3.669 | 0.007140929 |
| <i>PFKFB4</i>       | 6-phosphofructo-2-kinase/fructose-2,6-biphosphatase 4                      | -3.711 | 0.000209785 |
| <i>LOC105378179</i> | uncharacterized LOC105378179                                               | -3.756 | 2.88E-09    |
| <i>TACCI</i>        | transforming acidic coiled-coil containing protein 1                       | -3.807 | 2.24E-05    |
| <i>IQGAP2</i>       | IQ motif containing GTPase activating protein 2                            | -3.816 | 0.000153473 |
| <i>SIRT4</i>        | sirtuin 4                                                                  | -3.833 | 1.25E-10    |
| <i>ARHGEF40</i>     | Rho guanine nucleotide exchange factor 40                                  | -3.840 | 0.03211052  |
| <i>TM4SF4</i>       | transmembrane 4 L six family member 4                                      | -3.966 | 1.70E-10    |
| <i>PRLR</i>         | prolactin receptor                                                         | -3.995 | 2.00E-05    |
| <i>SLC29A4</i>      | solute carrier family 29 member 4                                          | -4.043 | 4.10E-11    |
| <i>LOC102724740</i> | uncharacterized LOC102724740                                               | -4.052 | 0.021447868 |
| <i>LGR4</i>         | leucine rich repeat containing G protein-coupled receptor 4                | -4.087 | 4.51E-05    |
| <i>PDZK1</i>        | PDZ domain containing 1                                                    | -4.106 | 0.046423012 |
| <i>PAPSS2</i>       | 3'-phosphoadenosine 5'-phosphosulfate synthase 2                           | -4.120 | 1.12E-05    |
| <i>PLOD2</i>        | procollagen-lysine,2-oxoglutarate 5-dioxygenase 2                          | -4.227 | 3.73E-13    |
| <i>KCNE3</i>        | potassium voltage-gated channel subfamily E regulatory subunit 3           | -4.322 | 0.009083405 |
| <i>TP53I11</i>      | tumor protein p53 inducible protein 11                                     | -4.382 | 1.84E-10    |
| <i>NDRG1</i>        | N-myc downstream regulated 1                                               | -4.385 | 4.53E-13    |
| <i>PTPRB</i>        | protein tyrosine phosphatase, receptor type B                              | -4.479 | 4.46E-11    |
| <i>CLDN2</i>        | claudin 2                                                                  | -4.503 | 1.04E-06    |
| <i>CFH</i>          | complement factor H                                                        | -4.602 | 3.46E-09    |
| <i>CLU</i>          | clusterin                                                                  | -4.613 | 0.045882073 |
| <i>ABCA1</i>        | ATP binding cassette subfamily A member 1                                  | -4.628 | 0.004986765 |
| <i>PEG10</i>        | paternally expressed 10                                                    | -4.693 | 0.033230131 |
| <i>GRAMD1B</i>      | GRAM domain containing 1B                                                  | -4.833 | 1.50E-14    |
| <i>PPP1R1B</i>      | protein phosphatase 1 regulatory inhibitor subunit 1B                      | -4.866 | 0.032911557 |
| <i>SLC11A2</i>      | solute carrier family 11 member 2                                          | -4.922 | 3.95E-15    |
| <i>GJB1</i>         | gap junction protein beta 1                                                | -4.994 | 0.023163277 |
| <i>HNF1A-AS1</i>    | HNF1A antisense RNA 1                                                      | -5.032 | 0.038340167 |
| <i>RNF183</i>       | ring finger protein 183                                                    | -5.279 | 0.035896831 |
| <i>PLXND1</i>       | plexin D1                                                                  | -5.468 | 6.02E-06    |
| <i>CD109</i>        | CD109 molecule                                                             | -5.516 | 0.013816545 |
| <i>PLCB4</i>        | phospholipase C beta 4                                                     | -5.627 | 0.038805614 |
| <i>ANTXR1</i>       | anthrax toxin receptor 1                                                   | -5.678 | 0.031171923 |
| <i>MGAT3</i>        | mannosyl (beta-1,4-)-glycoprotein beta-1,4-N-acetylglucosaminyltransferase | -5.718 | 0.000874274 |
| <i>WWTR1</i>        | WW domain containing transcription regulator 1                             | -5.749 | 0.002603325 |
| <i>CDH17</i>        | cadherin 17                                                                | -5.753 | 0.001298533 |
| <i>TPPP3</i>        | tubulin polymerization promoting protein family member 3                   | -5.761 | 8.25E-05    |
| <i>DNAJC22</i>      | DnaJ heat shock protein family (Hsp40) member C22                          | -5.793 | 0.005732023 |
| <i>EGLN3</i>        | egl-9 family hypoxia inducible factor 3                                    | -5.839 | 3.97E-07    |
| <i>C1S</i>          | complement C1s                                                             | -5.910 | 0.026032097 |
| <i>TNS1</i>         | tensin 1                                                                   | -5.965 | 5.04E-16    |
| <i>DHRS3</i>        | dehydrogenase/reductase 3                                                  | -5.975 | 8.80E-07    |
| <i>STRA6</i>        | stimulated by retinoic acid 6                                              | -6.021 | 0.001648149 |
| <i>COLCA1</i>       | colorectal cancer associated 1                                             | -6.082 | 0.007537002 |
| <i>LOC105370256</i> | uncharacterized LOC105370256                                               | -6.142 | 0.000120877 |
| <i>C3</i>           | complement C3                                                              | -6.366 | 3.90E-09    |
| <i>CXCL5</i>        | C-X-C motif chemokine ligand 5                                             | -6.485 | 1.50E-14    |
| <i>ADRA2A</i>       | adrenoceptor alpha 2A                                                      | -6.502 | 0.00214777  |
| <i>OSMR</i>         | oncostatin M receptor                                                      | -6.546 | 0.007723224 |
| <i>GPRIN3</i>       | GPRIN family member 3                                                      | -6.602 | 0.015333478 |
| <i>PPFIA4</i>       | PTPRF interacting protein alpha 4                                          | -6.718 | 0.017951726 |
| <i>ABCC2</i>        | ATP binding cassette subfamily C member 2                                  | -6.719 | 3.11E-12    |
| <i>BMPRI1B</i>      | bone morphogenetic protein receptor type 1B                                | -6.739 | 0.010647227 |
| <i>AXL</i>          | AXL receptor tyrosine kinase                                               | -6.786 | 0.026028138 |
| <i>SLITRK6</i>      | SLIT and NTRK like family member 6                                         | -6.994 | 8.30E-06    |
| <i>RAB37</i>        | RAB37, member RAS oncogene family                                          | -7.004 | 0.002311488 |

|                     |                                                                  |         |             |
|---------------------|------------------------------------------------------------------|---------|-------------|
| <i>PIGZ</i>         | phosphatidylinositol glycan anchor biosynthesis class Z          | -7.108  | 0.000209785 |
| <i>DIP2C</i>        | disco interacting protein 2 homolog C                            | -7.109  | 0.016878127 |
| <i>FADS2</i>        | fatty acid desaturase 2                                          | -7.147  | 3.83E-05    |
| <i>CNTNAP3</i>      | contactin associated protein-like 3                              | -7.173  | 0.012861253 |
| <i>MAP1B</i>        | microtubule associated protein 1B                                | -7.198  | 3.77E-15    |
| <i>COL5A2</i>       | collagen type V alpha 2 chain                                    | -7.207  | 0.00206874  |
| <i>ST8SIA4</i>      | ST8 alpha-N-acetyl-neuraminide alpha-2,8-sialyltransferase 4     | -7.526  | 0.003907819 |
| <i>ASCL2</i>        | achaete-scute family bHLH transcription factor 2                 | -7.571  | 0.035225575 |
| <i>CNTN1</i>        | contactin 1                                                      | -7.673  | 3.69E-16    |
| <i>MOGAT3</i>       | monoacylglycerol O-acyltransferase 3                             | -7.745  | 0.02414016  |
| <i>LRP4</i>         | LDL receptor related protein 4                                   | -7.755  | 0.021477372 |
| <i>PCDH9</i>        | protocadherin 9                                                  | -7.858  | 0.004183485 |
| <i>OBSL1</i>        | obscurin like 1                                                  | -7.924  | 0.009948122 |
| <i>APLP1</i>        | amyloid beta precursor like protein 1                            | -7.935  | 0.005655414 |
| <i>CALD1</i>        | caldesmon 1                                                      | -7.993  | 0.004566192 |
| <i>SPP1</i>         | secreted phosphoprotein 1                                        | -8.019  | 8.91E-06    |
| <i>SYT1</i>         | synaptotagmin 1                                                  | -8.028  | 0.002311488 |
| <i>MUC1</i>         | mucin 1, cell surface associated                                 | -8.258  | 3.55E-05    |
| <i>NRG1</i>         | neuregulin 1                                                     | -8.287  | 0.003395438 |
| <i>EYA4</i>         | EYA transcriptional coactivator and phosphatase 4                | -8.413  | 0.004351272 |
| <i>CNNM1</i>        | cyclin and CBS domain divalent metal cation transport mediator 1 | -8.701  | 0.002571225 |
| <i>MYO7B</i>        | myosin VIIB                                                      | -8.874  | 3.97E-05    |
| <i>CPLX2</i>        | complexin 2                                                      | -9.136  | 9.87E-16    |
| <i>NBEA</i>         | neurobeachin                                                     | -9.165  | 0.010971761 |
| <i>TMEM74B</i>      | transmembrane protein 74B                                        | -9.208  | 0.038336674 |
| <i>SNURF</i>        | SNRPN upstream reading frame                                     | -9.289  | 0.034415237 |
| <i>IHH</i>          | indian hedgehog                                                  | -9.380  | 0.026032097 |
| <i>EDN1</i>         | endothelin 1                                                     | -9.433  | 0.001285415 |
| <i>FGFR1</i>        | fibroblast growth factor receptor 1                              | -9.580  | 0.023069421 |
| <i>ANGPT4</i>       | angiopoietin 4                                                   | -9.664  | 0.002469733 |
| <i>LOC100505817</i> | uncharacterized LOC100505817                                     | -9.692  | 0.002571225 |
| <i>THSD7A</i>       | thrombospondin type 1 domain containing 7A                       | -9.713  | 6.82E-05    |
| <i>PRICKLE2</i>     | prickle planar cell polarity protein 2                           | -9.849  | 0.005237809 |
| <i>C2orf72</i>      | chromosome 2 open reading frame 72                               | -9.871  | 0.004286404 |
| <i>ANXA13</i>       | annexin A13                                                      | -9.976  | 0.000881513 |
| <i>BASP1</i>        | brain abundant membrane attached signal protein 1                | -10.054 | 0.00188112  |
| <i>BNIP3</i>        | BCL2 interacting protein 3                                       | -10.074 | 0.001034732 |
| <i>CCDC183</i>      | coiled-coil domain containing 183                                | -10.380 | 0.032911557 |
| <i>NINL</i>         | ninein like                                                      | -10.390 | 0.045882073 |
| <i>ELOVL5</i>       | ELOVL fatty acid elongase 5                                      | -10.395 | 0.003173521 |
| <i>HHLA2</i>        | HERV-H LTR-associating 2                                         | -10.553 | 0.001371069 |
| <i>CNTNAP3B</i>     | contactin associated protein-like 3B                             | -10.631 | 0.00223658  |
| <i>EVC</i>          | EvC ciliary complex subunit 1                                    | -10.752 | 0.009443983 |
| <i>IGFBP1</i>       | insulin like growth factor binding protein 1                     | -10.754 | 0.002001995 |
| <i>UCHL1</i>        | ubiquitin C-terminal hydrolase L1                                | -11.158 | 2.24E-05    |
| <i>NDUFA4L2</i>     | NDUFA4, mitochondrial complex associated like 2                  | -11.687 | 1.73E-15    |
| <i>KRASP1</i>       | KRAS proto-oncogene, GTPase pseudogene 1                         | -11.693 | 0.04653213  |
| <i>COL4A5</i>       | collagen type IV alpha 5 chain                                   | -11.992 | 0.000152035 |
| <i>TET1</i>         | tet methylcytosine dioxygenase 1                                 | -12.218 | 0.001607259 |
| <i>NXP4</i>         | neurexophilin 4                                                  | -12.468 | 5.40E-05    |
| <i>THBD</i>         | thrombomodulin                                                   | -12.926 | 0.008928496 |
| <i>DDX3Y</i>        | DEAD-box helicase 3, Y-linked                                    | -13.092 | 0.001052232 |
| <i>COL27A1</i>      | collagen type XXVII alpha 1 chain                                | -13.158 | 0.000237724 |
| <i>NR3C1</i>        | nuclear receptor subfamily 3 group C member 1                    | -13.212 | 0.00015704  |
| <i>SSPO</i>         | SCO-spondin                                                      | -14.006 | 0.006665758 |
| <i>CA9</i>          | carbonic anhydrase 9                                             | -14.081 | 1.76E-30    |
| <i>ZNF618</i>       | zinc finger protein 618                                          | -14.119 | 0.000115722 |
| <i>PKDCC</i>        | protein kinase domain containing, cytoplasmic                    | -14.170 | 0.007535705 |
| <i>SLC4A4</i>       | solute carrier family 4 member 4                                 | -14.193 | 0.044891944 |
| <i>PIGR</i>         | polymeric immunoglobulin receptor                                | -14.312 | 1.00E-06    |
| <i>RAB34</i>        | RAB34, member RAS oncogene family                                | -14.450 | 0.045108008 |
| <i>TBX18</i>        | T-box 18                                                         | -14.510 | 8.61E-05    |
| <i>HAVCR1</i>       | hepatitis A virus cellular receptor 1                            | -14.544 | 6.81E-05    |
| <i>GPA33</i>        | glycoprotein A33                                                 | -15.053 | 0.0071381   |
| <i>SETBP1</i>       | SET binding protein 1                                            | -15.148 | 0.001323852 |
| <i>NEBL</i>         | nebullette                                                       | -15.487 | 0.020077019 |



|                         |                                                                  |          |             |
|-------------------------|------------------------------------------------------------------|----------|-------------|
| <i>FMOD</i>             | fibromodulin                                                     | -15.793  | 0.007462809 |
| <i>PPP1R3C</i>          | protein phosphatase 1 regulatory subunit 3C                      | -15.948  | 0.02377648  |
| <i>SCN9A</i>            | sodium voltage-gated channel alpha subunit 9                     | -16.747  | 0.000461949 |
| <i>FN1</i>              | fibronectin 1                                                    | -17.058  | 1.14E-44    |
| <i>FGG</i>              | fibrinogen gamma chain                                           | -17.363  | 2.93E-05    |
| <i>ITGA5</i>            | integrin subunit alpha 5                                         | -17.511  | 0.000224205 |
| <i>VTN</i>              | vitronectin                                                      | -17.548  | 4.95E-05    |
| <i>IGF2BP1</i>          | insulin like growth factor 2 mRNA binding protein 1              | -17.728  | 1.98E-05    |
| <i>HYAL1</i>            | hyaluronoglucosaminidase 1                                       | -17.993  | 0.026032097 |
| <i>C20orf194</i>        | chromosome 20 open reading frame 194                             | -18.863  | 9.54E-05    |
| <i>QKI</i>              | QKI, KH domain containing RNA binding                            | -19.053  | 8.61E-05    |
| <i>FGL1</i>             | fibrinogen like 1                                                | -19.207  | 1.43E-05    |
| <i>TMEM169</i>          | transmembrane protein 169                                        | -19.684  | 0.01594565  |
| <i>CPPED1</i>           | calcineurin like phosphoesterase domain containing 1             | -20.140  | 0.001209375 |
| <i>VIM</i>              | vimentin                                                         | -20.431  | 9.33E-19    |
| <i>SLC2A3</i>           | solute carrier family 2 member 3                                 | -20.670  | 1.31E-05    |
| <i>CP</i>               | ceruloplasmin                                                    | -21.907  | 2.08E-30    |
| <i>TM4SF18</i>          | transmembrane 4 L six family member 18                           | -22.504  | 0.000200518 |
| <i>LOC105370503</i>     | uncharacterized LOC105370503                                     | -22.566  | 0.002874584 |
| <i>MUC5B</i>            | mucin 5B, oligomeric mucus/gel-forming                           | -23.321  | 4.75E-51    |
| <i>FCGBP</i>            | Fc fragment of IgG binding protein                               | -23.503  | 1.36E-05    |
| <i>CPS1</i>             | carbamoyl-phosphate synthase 1                                   | -23.519  | 2.16E-06    |
| <i>TLL6</i>             | tubulin tyrosine ligase like 6                                   | -23.715  | 2.05E-06    |
| <i>SLFN11</i>           | schlafen family member 11                                        | -24.382  | 0.042924175 |
| <i>LOXL2</i>            | lysyl oxidase like 2                                             | -24.671  | 0.02414016  |
| <i>RNF217</i>           | ring finger protein 217                                          | -24.725  | 6.94E-05    |
| <i>TMEM246</i>          | transmembrane protein 246                                        | -24.914  | 0.027986129 |
| <i>RNASE4</i>           | ribonuclease A family member 4                                   | -27.113  | 6.02E-06    |
| <i>LRRK2</i>            | leucine rich repeat kinase 2                                     | -28.056  | 1.51E-05    |
| <i>MPDZ</i>             | multiple PDZ domain crumbs cell polarity complex component       | -32.482  | 0.000950561 |
| <i>ALPK2</i>            | alpha kinase 2                                                   | -33.915  | 2.05E-06    |
| <i>FGA</i>              | fibrinogen alpha chain                                           | -35.261  | 2.04E-09    |
| <i>IGFBP3</i>           | insulin like growth factor binding protein 3                     | -38.764  | 3.41E-53    |
| <i>STC1</i>             | stanniocalcin 1                                                  | -43.303  | 1.52E-05    |
| <i>TEN1-CDK3</i>        | TEN1-CDK3 readthrough (NMD candidate)                            | -50.116  | 0.031842117 |
| <i>FXVD2</i>            | FXVD domain containing ion transport regulator 2                 | -80.144  | 2.02E-08    |
| <i>ACTG1P10</i>         | actin gamma 1 pseudogene 10                                      | -82.553  | 0.001803809 |
| <i>UGT1A4</i>           | UDP glucuronosyltransferase family 1 member A4                   | -88.100  | 0.00066772  |
| <i>TIMD4</i>            | T-cell immunoglobulin and mucin domain containing 4              | -88.838  | 0.034415237 |
| <i>LOC400927-CSNK1E</i> | LOC400927-CSNK1E readthrough                                     | -89.990  | 0.000438762 |
| <i>HSPA12A</i>          | heat shock protein family A (Hsp70) member 12A                   | -94.060  | 0.013267691 |
| <i>KCNE4</i>            | potassium voltage-gated channel subfamily E regulatory subunit 4 | -97.994  | 0.014052393 |
| <i>SPX</i>              | spexin hormone                                                   | -111.060 | 0.004986765 |
| <i>FGB</i>              | fibrinogen beta chain                                            | -111.402 | 7.09E-10    |
| <i>PDE4B</i>            | phosphodiesterase 4B                                             | -111.960 | 0.006245259 |
| <i>PHOSPHO2-KLHL23</i>  | PHOSPHO2-KLHL23 readthrough                                      | -117.579 | 2.81E-05    |
| <i>KLF7</i>             | Kruppel like factor 7                                            | -119.444 | 0.00206874  |
| <i>LOC100129550</i>     | uncharacterized LOC100129550                                     | -135.133 | 1.34E-05    |
| <i>LINC00473</i>        | long intergenic non-protein coding RNA 473                       | -136.155 | 0.000678652 |
| <i>USP9Y</i>            | ubiquitin specific peptidase 9, Y-linked                         | -176.125 | 1.03E-05    |
| <i>UGT1A1</i>           | UDP glucuronosyltransferase family 1 member A1                   | -180.312 | 9.66E-07    |
| <i>PNMA2</i>            | paraneoplastic Ma antigen 2                                      | -184.355 | 2.56E-06    |
| <i>ANPEP</i>            | alanyl aminopeptidase, membrane                                  | -211.352 | 2.66E-07    |
| <i>STC2</i>             | stanniocalcin 2                                                  | -368.339 | 7.60E-10    |

<sup>1</sup> Significant differences between the Flight and Ground cultures were determined according to an FDR < 0.05 and a minimum log<sub>2</sub> fold change of 1 or -1 (2-fold increase or decrease in expression, respectively). Log<sub>2</sub>-fold change values were converted to fold change in this table. Red shading indicates upregulation in the Flight culture, blue shading downregulation in the Flight culture.

**Supplementary Table 2. Enrichment analysis of uninfected Flight versus uninfected Ground HT-29 cultures<sup>1</sup>**

| Category             | Term                                                       | Count | %     | Genes                                                                                                                                                                                                                                                                                                                                                                                                                                              | Fold enrichment | P-value  | $-\log_{10}$ Benjamini |
|----------------------|------------------------------------------------------------|-------|-------|----------------------------------------------------------------------------------------------------------------------------------------------------------------------------------------------------------------------------------------------------------------------------------------------------------------------------------------------------------------------------------------------------------------------------------------------------|-----------------|----------|------------------------|
| <b>UPREGULATED</b>   |                                                            |       |       |                                                                                                                                                                                                                                                                                                                                                                                                                                                    |                 |          |                        |
| Biological Process   | GO:0060337 type I interferon signaling pathway             | 5     | 11.11 | <i>OASL, OAS3, SAMHD1, RSAD2, MX1</i>                                                                                                                                                                                                                                                                                                                                                                                                              | 32.80           | 1.43E-05 | 2.388345951            |
| Biological Process   | GO:0051607 defense response to virus                       | 6     | 13.33 | <i>IFNL1, OASL, OAS3, SAMHD1, RSAD2, MX1</i>                                                                                                                                                                                                                                                                                                                                                                                                       | 15.27           | 3.79E-05 | 2.265871718            |
| Biological Process   | GO:0008544 epidermis development                           | 5     | 11.11 | <i>SPRR1A, SPRR1B, SPRR3, GRHL3, LAMC2</i>                                                                                                                                                                                                                                                                                                                                                                                                         | 24.69           | 4.39E-05 | 2.377336673            |
| Biological Process   | GO:0045071 negative regulation of viral genome replication | 4     | 8.89  | <i>OASL, OAS3, RSAD2, MX1</i>                                                                                                                                                                                                                                                                                                                                                                                                                      | 41.98           | 1.08E-04 | 2.113091102            |
| Biological Process   | GO:0006260 DNA replication                                 | 5     | 11.11 | <i>CLSPN, RRM2, KIAA0101, MCM10, BRCA1</i>                                                                                                                                                                                                                                                                                                                                                                                                         | 13.54           | 4.47E-04 | 1.596560713            |
| Biological Process   | GO:0030216 keratinocyte differentiation                    | 4     | 8.89  | <i>EREG, SPRR1A, SPRR1B, SPRR3</i>                                                                                                                                                                                                                                                                                                                                                                                                                 | 22.09           | 7.24E-04 | 1.467753718            |
| <b>DOWNREGULATED</b> |                                                            |       |       |                                                                                                                                                                                                                                                                                                                                                                                                                                                    |                 |          |                        |
| Cellular Component   | GO:0005615 extracellular space                             | 45    | 17.18 | <i>FMOD, BTD, CXCL5, C3, CLU, EDN1, CD109, VTN, ANPEP, ALDH3A1, FGG, SPX, FGA, FGB, ENO2, CFH, CEACAM6, LOXL2, NRG1, MUC13, SPPI, ANGPT4, IHH, FNI, MUC1, HYALI, STC2, AXL, IGF2, PIGR, TCN2, SSPO, PROM1, THBD, F5, SEMA4G, ANXA13, STC1, CP, IGFBP1, LRRK2, AGR2, IGFBP3, MUC5B, IGFBP4</i>                                                                                                                                                      | 2.54            | 1.49E-08 | 5.399741954            |
| Cellular Component   | GO:0016324 apical plasma membrane                          | 18    | 6.87  | <i>MUC1, OSMR, MPDZ, ANO1, PDE4D, CFTR, PTPRO, PROM1, SLC11A2, SLC29A4, ANXA13, STC1, ABCC2, NRG1, PDZK1, MUC13, FNI, KCNE4</i>                                                                                                                                                                                                                                                                                                                    | 4.70            | 3.16E-07 | 4.373333213            |
| Cellular Component   | GO:0009986 cell surface                                    | 24    | 9.16  | <i>PTPRJ, PPFIA4, CLU, CD109, AXL, IQGAP2, CFTR, SLC11A2, PROM1, FGG, THBD, TNS1, FGA, PRLR, FGB, CDH17, ITGA5, GPA33, ABCC2, ANTXR1, CD24, SLITRK6, LRP4, F2R</i>                                                                                                                                                                                                                                                                                 | 3.36            | 8.01E-07 | 4.145184179            |
| Cellular Component   | GO:0070062 extracellular exosome                           | 66    | 25.19 | <i>GDA, ARSD, BTD, MYO7B, ANO1, UCHL1, IQGAP2, VTN, ANPEP, TSPAN8, PLOD2, SLC2A3, CFH, SLC4A4, MUC13, PTPRJ, PRKCA, HYALI, VILI, CFTR, BASP1, PIGR, TCN2, PTPRO, MYADM, NEBL, CLDN2, CNTN1, GPA33, LRRK2, FXYD2, TPPP3, C3, VIM, CLU, CIS, UGT1A9, FGG, FGA, FGB, ENO2, NDRG1, FGLI, FNI, SPPI, MUC1, CPPED1, RNASE4, AXL, HGD, IGF2, DPYSL2, AK4, PROM1, THSD7A, HSPA12A, FREM2, RAB34, ANXA13, QPRT, FCGBP, CP, ANTXR1, IGFBP3, PDZK1, MUC5B</i> | 1.78            | 1.92E-06 | 3.890264065            |
| Cellular Component   | GO:0005577 fibrinogen complex                              | 5     | 1.91  | <i>FGG, FGA, FGB, FGLI, FNI</i>                                                                                                                                                                                                                                                                                                                                                                                                                    | 42.19           | 3.45E-06 | 3.732805436            |
| Cellular Component   | GO:0031093 platelet alpha granule lumen                    | 7     | 2.67  | <i>FGG, F5, FGA, FGB, CLU, IGF2, FNI</i>                                                                                                                                                                                                                                                                                                                                                                                                           | 9.66            | 8.09E-05 | 2.442616639            |
| Cellular Component   | GO:0072562 blood microparticle                             | 10    | 3.82  | <i>FGG, FGA, FGB, C3, CLU, CFH, VTN, CIS, CP, FNI</i>                                                                                                                                                                                                                                                                                                                                                                                              | 5.00            | 1.82E-04 | 2.157871705            |
| KEGG pathway         | hsa04610: Complement and coagulation cascades              | 9     | 3.44  | <i>FGG, THBD, F5, FGA, FGB, C3, CFH, CIS, F2R</i>                                                                                                                                                                                                                                                                                                                                                                                                  | 8.55            | 8.12E-06 | 2.828325559            |

<sup>1</sup> Differentially expressed upregulated and downregulated human transcripts between uninfected Flight and Ground cultures were analyzed using DAVID 6.8 using a threshold count of 2, an EASE score of 0.05 and Benjamini-Hochberg correction (< 0.05)

**Supplementary Table 3. Differentially expressed host proteins in STL-IMMUNE<sup>1</sup>**

| Protein identifier                          | Description                               | Fold Change | P-Value  |
|---------------------------------------------|-------------------------------------------|-------------|----------|
| <b>Uninfected only: Flight vs. Ground</b>   |                                           |             |          |
| TBA1C_HUMAN                                 | Tubulin alpha-1C chain                    | 4.20        | 0.0417   |
| ACTG_HUMAN                                  | Actin, cytoplasmic 2                      | 3.98        | 0.01083  |
| HSPA1A_HUMAN                                | Heat shock 70 kDa protein 1A              | 2.42        | 0.047    |
| <b>Flight only: Infected vs. Uninfected</b> |                                           |             |          |
| K2C8_HUMAN                                  | Keratin, type II cytoskeletal 8           | - 11.37     | 1.3E-04  |
| K1C18_HUMAN                                 | Keratin, type I cytoskeletal 18           | - 5.86      | 0.00232  |
| AL1A1_HUMAN                                 | Retinal dehydrogenase 1                   | - 11.69     | 0.02619  |
| TBA1C_HUMAN                                 | Tubulin alpha-1C chain                    | - 11.91     | 0.02741  |
| ACTN4_HUMAN                                 | Alpha-actinin-4                           | - 16.15     | 0.03009  |
| <b>Ground only: Infected vs. Uninfected</b> |                                           |             |          |
| PDIA3_HUMAN                                 | Protein disulfide-isomerase A3            | 5.10        | 5.37E-03 |
| ROA2_HUMAN                                  | Heterogeneous ribonucleoproteins A2/B1    | 4.65        | 0.01290  |
| S10A6_HUMAN                                 | Protein S100-A6                           | 3.90        | 0.04558  |
| CH10_HUMAN                                  | 10 kDa heat shock protein, mitochondrial  | 3.87        | 0.04361  |
| K2C8_HUMAN                                  | Keratin, type II cytoskeletal 8           | 3.80        | 5.25E-05 |
| GRP78_HUMAN                                 | 78 kDa glucose-related protein            | 3.63        | 0.01112  |
| K1C18_HUMAN                                 | Keratin, type I cytoskeletal 18           | 3.25        | 3.05E-06 |
| HSPA1A_HUMAN                                | Heat shock 70 kDa protein 1A              | 3.01        | 0.0121   |
| K1C19_HUMAN                                 | Keratin, type I cytoskeletal 19           | 3.37        | 0.04404  |
| ITIH2_HUMAN                                 | Inter-alpha-trypsin inhibitor heavy chain | - 18.53     | 2.04E-04 |
| FETUA_HUMAN                                 | Alpha-2-HS-glycoprotein                   | - 9.20      | 0.01541  |
| A2MG_HUMAN                                  | Alpha-2-macroglobulin                     | - 8.47      | 6.00E-03 |
| CO3_HUMAN                                   | Complement C3                             | - 28.32     | 0.03718  |
| <b>Infected only: Flight vs. Ground</b>     |                                           |             |          |
| K2C8_HUMAN                                  | Keratin, type II cytoskeletal 8           | - 18.72     | 6.05E-07 |
| K1C18_HUMAN                                 | Keratin, type I cytoskeletal 18           | - 10.10     | 4.07E-05 |
| AL1A1_HUMAN                                 | Retinal dehydrogenase 1                   | - 13.07     | 4.52E-03 |
| HSPA1A_HUMAN                                | Heat shock 70 kDa protein 1A              | - 2.55      | 4.32E-03 |
| H4_HUMAN                                    | Histone H4                                | - 11.80     | 7.19E-03 |
| PDIA3_HUMAN                                 | Protein disulfide-isomerase A3            | - 10.10     | 9.87E-03 |
| A2MG_HUMAN                                  | Alpha-2-macroglobulin                     | 5.59        | 0.0142   |
| CO3_HUMAN                                   | Complement C3                             | 13.80       | 0.0479   |

<sup>1</sup> Relative expression levels of significantly increased or decreased proteins in response to flight and/or infection ( $p < 0.05$ ; two-tailed ANOVA). Ratios are plotted as fold changes: red shading indicates increased protein expression in the flight cultures (for the flight vs ground comparisons) or the infected culture (for infected vs uninfected comparisons). Likewise, blue shading represents decreased protein expression. Differential proteins were identified with at least 3 unique peptides (>95% confidence, 1% FDR). Additional information on the identified proteins is given in Supplemental Material, Table 11.



## Supplementary Table 4. Differentially expressed host genes in Flight infected vs uninfected cultures<sup>1</sup>

Blue text highlights genes that were also regulated in the Ground infection and show the same trend

Red text highlights genes that were also regulated in the Ground infection but show the opposite trend

| Gene                            | Description                                       | Fold Change | Unique to Flight infection | FDR         |
|---------------------------------|---------------------------------------------------|-------------|----------------------------|-------------|
| <b>Upregulated genes (40)</b>   |                                                   |             |                            |             |
| <i>PHOSPHO2-KLHL23</i>          | <i>PHOSPHO2-KLHL23</i> readthrough                | 158.303     |                            | 4.68E-07    |
| <i>UGT1A4</i>                   | UDP glucuronosyltransferase family 1 member A4    | 146.645     | X                          | 2.31E-06    |
| <i>LOC400927-CSNK1E</i>         | <i>LOC400927-CSNK1E</i> readthrough               | 123.227     | X                          | 1.06E-05    |
| <i>EEF1E1-BLOC1S5</i>           | <i>EEF1E1-BLOC1S5</i> readthrough (NMD candidate) | 100.030     | X                          | 0.003979554 |
| <i>FKBP1A-SDCBP2</i>            | <i>FKBP1A-SDCBP2</i> readthrough (NMD candidate)  | 93.738      | X                          | 0.017759244 |
| <i>TEN1-CDK3</i>                | <i>TEN1-CDK3</i> readthrough (NMD candidate)      | 65.932      | X                          | 0.003811145 |
| <i>CCL20</i>                    | C-C motif chemokine ligand 20                     | 53.767      |                            | 1.20E-09    |
| <i>CXCL1</i>                    | C-X-C motif chemokine ligand 1                    | 24.925      |                            | 9.02E-51    |
| <i>IL17C</i>                    | interleukin 17C                                   | 23.697      | X                          | 5.87E-06    |
| <i>HOXA10-HOXA9</i>             | <i>HOXA10-HOXA9</i> readthrough                   | 22.598      |                            | 0.034598034 |
| <i>CXCL3</i>                    | C-X-C motif chemokine ligand 3                    | 22.509      |                            | 3.69E-14    |
| <i>MIR3142HG</i>                | <i>MIR3142</i> host gene                          | 22.090      |                            | 9.46E-06    |
| <i>SSPO</i>                     | SCO-spondin                                       | 12.899      |                            | 0.005956134 |
| <i>NANOGP2</i>                  | Nanog homeobox pseudogene 2                       | 10.569      | X                          | 0.001183961 |
| <i>LOC103344931</i>             | uncharacterized LOC103344931                      | 10.279      | X                          | 0.002603989 |
| <i>CXCL2</i>                    | C-X-C motif chemokine ligand 2                    | 9.040       |                            | 1.03E-15    |
| <i>LOC105378179</i>             | uncharacterized LOC105378179                      | 8.699       |                            | 4.75E-25    |
| <i>CXCL8</i>                    | C-X-C motif chemokine ligand 8                    | 7.919       |                            | 8.68E-25    |
| <i>LINC01296</i>                | long intergenic non-protein coding RNA 1296       | 7.606       | X                          | 0.016665007 |
| <i>PAK6</i>                     | p21 (RAC1) activated kinase 6                     | 6.306       | X                          | 0.032768093 |
| <i>IL32</i>                     | interleukin 32                                    | 5.454       | X                          | 0.044197545 |
| <i>LOC107987206</i>             | uncharacterized LOC107987206                      | 4.124       |                            | 3.31E-12    |
| <i>PI3</i>                      | peptidase inhibitor 3                             | 4.032       | X                          | 9.89E-13    |
| <i>TNFAIP3</i>                  | TNF alpha induced protein 3                       | 3.768       |                            | 1.06E-05    |
| <i>SIRT4</i>                    | sirtuin 4                                         | 3.748       | X                          | 7.51E-11    |
| <i>ICAM1</i>                    | intercellular adhesion molecule 1                 | 3.472       |                            | 8.39E-10    |
| <i>NFKBIZ</i>                   | NFKB inhibitor zeta                               | 3.211       |                            | 8.44E-09    |
| <i>BIRC3</i>                    | baculoviral IAP repeat containing 3               | 3.072       |                            | 1.93E-07    |
| <i>TNFAIP2</i>                  | TNF alpha induced protein 2                       | 2.761       |                            | 5.27E-06    |
| <i>BCL3</i>                     | B-cell CLL/lymphoma 3                             | 2.739       | X                          | 0.000539408 |
| <i>ZC3H12A</i>                  | zinc finger CCCH-type containing 12A              | 2.713       |                            | 1.88E-06    |
| <i>SDC4</i>                     | syndecan 4                                        | 2.702       |                            | 1.56E-05    |
| <i>SOD2</i>                     | superoxide dismutase 2, mitochondrial             | 2.303       | X                          | 0.000450759 |
| <i>IRAK2</i>                    | interleukin 1 receptor associated kinase 2        | 2.241       |                            | 0.003282668 |
| <i>RCAN1</i>                    | regulator of calcineurin 1                        | 2.213       |                            | 0.004362187 |
| <i>NFKBIA</i>                   | NFKB inhibitor alpha                              | 2.179       | X                          | 0.000714059 |
| <i>ZC3H12C</i>                  | zinc finger CCCH-type containing 12C              | 2.161       | X                          | 0.004128813 |
| <i>RELB</i>                     | RELB proto-oncogene, NF-kB subunit                | 2.135       | X                          | 0.003401183 |
| <i>METTL12</i>                  | methyltransferase like 12                         | 2.120       | X                          | 0.005321945 |
| <i>NFKB2</i>                    | nuclear factor kappa B subunit 2                  | 2.032       |                            | 0.004994745 |
| <b>Downregulated genes (22)</b> |                                                   |             |                            |             |
| <i>N4BP2L2-IT2</i>              | N4BPL2 intronic transcript 2                      | -2.338      | X                          | 0.001647584 |
| <i>FAM25A</i>                   | family with sequence similarity 25 member A       | -2.443      |                            | 0.032215301 |
| <i>IFT80</i>                    | intraflagellar transport 80                       | -2.625      | X                          | 0.002415638 |
| <i>RARRES1</i>                  | retinoic acid receptor responder 1                | -3.385      |                            | 0.017099356 |
| <i>SNORA53</i>                  | small nucleolar RNA, H/ACA box 53                 | -3.398      | X                          | 0.003442609 |
| <i>FNI</i>                      | fibronectin 1                                     | -3.507      |                            | 1.68E-05    |
| <i>CNTN1</i>                    | contactin 1                                       | -4.084      |                            | 0.000793169 |
| <i>MAP1B</i>                    | microtubule associated protein 1B                 | -4.178      |                            | 0.000563371 |
| <i>CXCL5</i>                    | C-X-C motif chemokine ligand 5                    | -4.850      |                            | 2.92E-05    |
| <i>CPLX2</i>                    | complexin 2                                       | -5.262      |                            | 0.000911363 |
| <i>MUC5B</i>                    | mucin 5B, oligomeric mucus/gel-forming            | -5.304      |                            | 6.70E-09    |
| <i>IGFBP3</i>                   | insulin like growth factor binding protein 3      | -6.234      |                            | 0.018915375 |
| <i>LOC105373455</i>             | uncharacterized LOC105373455                      | -9.804      | X                          | 0.045506961 |
| <i>POLR2J2</i>                  | RNA polymerase II subunit J2                      | -11.320     | X                          | 0.044197545 |
| <i>PEG10</i>                    | paternally expressed 10                           | -12.342     |                            | 0.006989355 |

| Downregulated genes (continued) |                                                                     |         |   |             |
|---------------------------------|---------------------------------------------------------------------|---------|---|-------------|
| <i>PLCL2</i>                    | phospholipase C like 2                                              | -13.103 |   | 0.049033867 |
| <i>NEK11</i>                    | NIMA related kinase 11                                              | -13.940 | X | 0.038807407 |
| <i>BIVM-ERCC5</i>               | <i>BIVM-ERCC5</i> readthrough                                       | -38.920 |   | 8.88E-05    |
| <i>LOC107984730</i>             | vesicle-associated membrane protein-associated protein A pseudogene | -47.041 | X | 0.022851037 |
| <i>ADGRL2</i>                   | adhesion G protein-coupled receptor L2                              | -53.298 |   | 0.01206827  |
| <i>ARPC4-TTLL3</i>              | <i>ARPC4-TTLL3</i> readthrough                                      | -56.646 |   | 0.027026184 |
| <i>KLHL23</i>                   | kelch like family member 23                                         | -90.467 |   | 0.000100019 |

<sup>1</sup> Significant differences between the infected and uninfected Flight cultures were determined according to an FDR < 0.05 and a minimum log2 fold change of 1 or -1 (2-fold increase or decrease in expression, respectively). Log2-fold change values were converted to fold change in this table. Red shading indicates upregulation and blue shading indicates downregulation in the infected cultures relative to the uninfected cultures.

**Supplementary Table 5. Enrichment analysis of Flight HT-29 cultures: infected versus uninfected<sup>1</sup>**

Blue text indicates GO terms/pathways that were **unique** to the Flight infection. Black text indicates terms/pathways that were **commonly regulated** between the Flight and Ground infection.

| Category                                                           | Term                                                                      | Count | %    | Genes                                                                                         | Fold enrichment | P-value     | -log <sub>10</sub> Benjamini |
|--------------------------------------------------------------------|---------------------------------------------------------------------------|-------|------|-----------------------------------------------------------------------------------------------|-----------------|-------------|------------------------------|
| <b>UPREGULATED</b>                                                 |                                                                           |       |      |                                                                                               |                 |             |                              |
| Biological Process                                                 | GO:0006954 inflammatory response                                          | 12    | 30   | <i>CXCL1, IL17C, IRAK2, NFKBIZ, CCL20, CXCL3, RELB, CXCL2, CXCL8, ZC3H12A, NFKB2, TNFAIP3</i> | 17.15           | 2.49E-11    | 7.990517998                  |
| Biological Process                                                 | GO:0007249 I-kappaB kinase/NF-kappaB signaling                            | 5     | 12.5 | <i>IRAK2, RELB, BCL3, NFKB2, BIRC3</i>                                                        | 45.14           | 3.76E-06    | 3.112680743                  |
| Biological Process                                                 | GO:0070098 chemokine-mediated signaling pathway                           | 5     | 12.5 | <i>CXCL1, CCL20, CXCL3, CXCL2, CXCL8</i>                                                      | 38.15           | 7.40E-06    | 2.995336528                  |
| Biological Process                                                 | GO:0090023 positive regulation of neutrophil chemotaxis                   | 4     | 10   | <i>CXCL1, CXCL3, CXCL2, CXCL8</i>                                                             | 98.49           | 7.74E-06    | 3.100434179                  |
| Biological Process                                                 | GO:0071222 cellular response to lipopolysaccharide                        | 5     | 12.5 | <i>ICAM1, CCL20, CXCL8, ZC3H12A, TNFAIP3</i>                                                  | 23.97           | 4.65E-05    | 2.41909551                   |
| Biological Process                                                 | GO:0002237 response to molecule of bacterial origin                       | 3     | 7.5  | <i>CXCL2, CXCL8, TNFAIP3</i>                                                                  | 180.56          | 1.10E-04    | 2.124716028                  |
| Biological Process                                                 | GO:0032496 response to lipopolysaccharide                                 | 5     | 12.5 | <i>CXCL1, CXCL3, CXCL2, NFKB2, SOD2</i>                                                       | 16.51           | 1.97E-04    | 1.939953555                  |
| Biological Process                                                 | GO:0071347 cellular response to interleukin-1                             | 4     | 10   | <i>ICAM1, CCL20, CXCL8, ZC3H12A</i>                                                           | 30.52           | 2.71E-04    | 1.860359033                  |
| Biological Process                                                 | GO:0032088 negative regulation of NF-kappaB transcription factor activity | 4     | 10   | <i>IRAK2, NFKBIA, ZC3H12A, TNFAIP3</i>                                                        | 30.52           | 2.71E-04    | 1.860359033                  |
| Biological Process                                                 | GO:0006955 immune response                                                | 6     | 15   | <i>CXCL1, CCL20, CXCL3, CXCL2, CXCL8, IL32</i>                                                | 7.72            | 8.22E-04    | 1.434736794                  |
| Biological Process                                                 | GO:0071356 cellular response to tumor necrosis factor                     | 4     | 10   | <i>ICAM1, CCL20, CXCL8, ZC3H12A</i>                                                           | 19.70           | 9.76E-04    | 1.40611286                   |
| Biological Process                                                 | GO:0071356 chemotaxis                                                     | 4     | 10   | <i>CXCL1, CCL20, CXCL2, CXCL8</i>                                                             | 17.76           | 0.001316366 | 1.319563934                  |
| Cellular Component                                                 | GO:0005615 extracellular space                                            | 10    | 25   | <i>CXCL1, IL17C, ICAM1, CCL20, CXCL3, CXCL2, CXCL8, IL32, SSPO, TNFAIP2</i>                   | 4.51            | 1.65E-04    | 2.093054837                  |
| Molecular Function                                                 | GO:0008009 chemokine activity                                             | 5     | 12.5 | <i>CXCL1, CCL20, CXCL3, CXCL2, CXCL8</i>                                                      | 55.57           | 1.62E-06    | 3.840056134                  |
| Molecular Function                                                 | GO:0045236 CXCR chemokine receptor binding                                | 3     | 7.5  | <i>CXCL1, CXCL3, CXCL2</i>                                                                    | 181.52          | 1.09E-04    | 2.314981649                  |
| KEGG pathway                                                       | hsa04668 TNF signaling pathway                                            | 9     | 22.5 | <i>CXCL1, ICAM1, CCL20, CXCL3, CXCL2, BCL3, NFKBIA, BIRC3, TNFAIP3</i>                        | 28.93           | 1.73E-10    | 7.870819522                  |
| KEGG pathway                                                       | hsa04064 NF-kappa B signaling pathway                                     | 7     | 17.5 | <i>ICAM1, RELB, CXCL8, NFKBIA, NFKB2, BIRC3, TNFAIP3</i>                                      | 27.67           | 8.18E-08    | 5.496342934                  |
| KEGG pathway                                                       | hsa05134 Legionellosis                                                    | 6     | 15   | <i>CXCL1, CXCL3, CXCL2, CXCL8, NFKBIA, NFKB2</i>                                              | 38.22           | 2.64E-07    | 5.163519008                  |
| KEGG pathway                                                       | hsa04621 NOD-like receptor signaling pathway                              | 6     | 15   | <i>CXCL1, CXCL2, CXCL8, NFKBIA, BIRC3, TNFAIP3</i>                                            | 36.85           | 3.18E-07    | 5.20792802                   |
| KEGG pathway                                                       | hsa04062 Chemokine signaling pathway                                      | 6     | 15   | <i>CXCL1, CCL20, CXCL3, CXCL2, CXCL8, NFKBIA</i>                                              | 11.10           | 1.17E-04    | 2.739140509                  |
| KEGG pathway                                                       | hsa05169 Epstein-Barr virus infection                                     | 5     | 12.5 | <i>ICAM1, RELB, NFKBIA, NFKB2, TNFAIP3</i>                                                    | 14.10           | 2.97E-04    | 2.414067009                  |
| KEGG pathway                                                       | hsa05132 Salmonella infection                                             | 4     | 10   | <i>CXCL1, CXCL3, CXCL2, CXCL8</i>                                                             | 16.58           | 0.001427686 | 1.801512825                  |
| KEGG pathway                                                       | hsa04060 Cytokine-cytokine receptor interaction                           | 5     | 12.5 | <i>CXCL1, CCL20, CXCL3, CXCL2, CXCL8</i>                                                      | 7.08            | 0.003872716 | 1.430326755                  |
| <b>DOWNREGULATED</b>                                               |                                                                           |       |      |                                                                                               |                 |             |                              |
| No GO terms or KEGG pathways were enriched for downregulated genes |                                                                           |       |      |                                                                                               |                 |             |                              |

<sup>1</sup> Differentially expressed upregulated and downregulated human transcripts between infected and uninfected Flight cultures were analyzed using DAVID 6.8 using a threshold count of 2, an EASE score of 0.05 and Benjamini-Hochberg correction ( $< 0.05$ )

**Supplementary Table 6. Differentially expressed host genes in Ground infected vs uninfected cultures<sup>1</sup>**

Blue text highlights genes that were also regulated in the Flight infection and show the same trend

Red text highlights genes that were also regulated in the Flight infection but show the opposite trend

| Gene                          | Description                                                    | Fold Change | Unique to Ground infection | FDR        |
|-------------------------------|----------------------------------------------------------------|-------------|----------------------------|------------|
| <b>Upregulated genes (59)</b> |                                                                |             |                            |            |
| <i>KLHL23</i>                 | kelch like family member 23                                    | 189.944     |                            | 6.42E-07   |
| <i>SLMO2-ATP5E</i>            | SLMO2-ATP5E readthrough                                        | 118.513     | X                          | 8.37E-05   |
| <i>CERS6-AS1</i>              | CERS6 antisense RNA 1                                          | 118.243     | X                          | 0.00090825 |
| <i>BIVM-ERCC5</i>             | BIVM-ERCC5 readthrough                                         | 110.615     |                            | 3.66E-06   |
| <i>CXCL6</i>                  | C-X-C motif chemokine ligand 6                                 | 110.465     | X                          | 0.00025661 |
| <i>UGT1A5</i>                 | UDP glucuronosyltransferase family 1 member A5                 | 106.395     | X                          | 0.00018975 |
| <i>RAB4B-EGLN2</i>            | RAB4B-EGLN2 readthrough (NMD candidate)                        | 98.631      | X                          | 0.0344097  |
| <i>SEN3-EIF4A1</i>            | SEN3-EIF4A1 readthrough (NMD candidate)                        | 96.638      | X                          | 0.00150814 |
| <i>NPHP3-ACAD11</i>           | NPHP3-ACAD11 readthrough (NMD candidate)                       | 93.435      | X                          | 0.00102942 |
| <i>NME1-NME2</i>              | NME1-NME2 readthrough                                          | 74.817      | X                          | 0.00398118 |
| <i>LOC107985867</i>           | uncharacterized LOC107985867                                   | 71.791      | X                          | 0.04166343 |
| <i>LOC642862</i>              | Ras homolog enriched in brain pseudogene                       | 66.202      | X                          | 0.00835659 |
| <i>LOC107985909</i>           | uncharacterized LOC107985909                                   | 57.230      | X                          | 0.03690048 |
| <i>ARPC4-TLL3</i>             | ARPC4-TLL3 readthrough                                         | 44.944      |                            | 0.02154135 |
| <i>CCL20</i>                  | C-C motif chemokine ligand 20                                  | 41.095      |                            | 5.36E-06   |
| <i>EEF1B2P1</i>               | eukaryotic translation elongation factor 1 beta 2 pseudogene 1 | 9.991       | X                          | 0.04093665 |
| <i>HOXA10-HOXA9</i>           | HOXA10-HOXA9 readthrough                                       | 9.851       |                            | 0.00138673 |
| <i>CXCL1</i>                  | C-X-C motif chemokine ligand 1                                 | 7.654       |                            | 1.58E-22   |
| <i>MIR3142HG</i>              | MIR3142 host gene                                              | 7.559       |                            | 0.00937465 |
| <i>IL4I1</i>                  | interleukin 4 induced 1                                        | 7.500       | X                          | 0.00742221 |
| <i>RARRES1</i>                | retinoic acid receptor responder 1                             | 4.350       |                            | 2.86E-09   |
| <i>CXCL8</i>                  | C-X-C motif chemokine ligand 8                                 | 4.297       |                            | 7.21E-12   |
| <i>CXCL2</i>                  | C-X-C motif chemokine ligand 2                                 | 4.289       |                            | 6.89E-05   |
| <i>ICAM1</i>                  | intercellular adhesion molecule 1                              | 3.950       |                            | 1.36E-11   |
| <i>CXCL3</i>                  | C-X-C motif chemokine ligand 3                                 | 3.844       |                            | 0.00367684 |
| <i>MRAS</i>                   | muscle RAS oncogene homolog                                    | 3.621       | X                          | 2.73E-09   |
| <i>ZC3H12A</i>                | zinc finger CCCH-type containing 12A                           | 3.038       |                            | 1.56E-07   |
| <i>PIGR</i>                   | polymeric immunoglobulin receptor                              | 2.937       | X                          | 0.04162124 |
| <i>SDC4</i>                   | syndecan 4                                                     | 2.813       |                            | 1.01E-05   |
| <i>NFKBIZ</i>                 | NFKB inhibitor zeta                                            | 2.808       |                            | 1.83E-06   |
| <i>IFNGR1</i>                 | interferon gamma receptor 1                                    | 2.739       | X                          | 2.57E-06   |
| <i>MCAM</i>                   | melanoma cell adhesion molecule                                | 2.738       | X                          | 0.00013574 |
| <i>TNFAIP3</i>                | TNF alpha induced protein 3                                    | 2.616       |                            | 0.03241145 |
| <i>STMN1</i>                  | stathmin 1                                                     | 2.608       | X                          | 1.44E-05   |
| <i>TSPAN8</i>                 | tetraspanin 8                                                  | 2.567       | X                          | 4.58E-05   |
| <i>DRAM1</i>                  | DNA damage regulated autophagy modulator 1                     | 2.532       | X                          | 7.84E-05   |
| <i>ATP8</i>                   | ATP synthase F0 subunit 8                                      | 2.427       | X                          | 0.00027523 |
| <i>HIST1H2BE</i>              | histone cluster 1 H2B family member e                          | 2.405       | X                          | 0.01499372 |
| <i>TLR4</i>                   | toll like receptor 4                                           | 2.385       | X                          | 0.03275059 |
| <i>TNFAIP2</i>                | TNF alpha induced protein 2                                    | 2.302       |                            | 0.0008292  |
| <i>CCNA2</i>                  | cyclin A2                                                      | 2.263       | X                          | 0.00618899 |
| <i>CDCA7</i>                  | cell division cycle associated 7                               | 2.241       | X                          | 0.00221468 |
| <i>ATP10B</i>                 | ATPase phospholipid transporting 10B (putative)                | 2.229       | X                          | 0.00112381 |
| <i>LOC100287290</i>           | cytokine receptor CRL2                                         | 2.228       | X                          | 0.01649054 |
| <i>TRIP13</i>                 | thyroid hormone receptor interactor 13                         | 2.221       | X                          | 0.00773495 |
| <i>CLEC3A</i>                 | C-type lectin domain family 3 member A                         | 2.215       | X                          | 0.00046371 |
| <i>CENPE</i>                  | centromere protein E                                           | 2.215       | X                          | 0.00831678 |
| <i>RCAN1</i>                  | regulator of calcineurin 1                                     | 2.207       |                            | 0.00835659 |
| <i>IRAK2</i>                  | interleukin 1 receptor associated kinase 2                     | 2.154       |                            | 0.01816602 |
| <i>LCN2</i>                   | lipocalin 2                                                    | 2.150       | X                          | 0.00201172 |
| <i>FAM111B</i>                | family with sequence similarity 111 member B                   | 2.109       | X                          | 0.007646   |
| <i>NFKB2</i>                  | nuclear factor kappa B subunit 2                               | 2.082       |                            | 0.01055386 |
| <i>BIRC3</i>                  | baculoviral IAP repeat containing 3                            | 2.063       |                            | 0.01724045 |
| <i>CEACAM1</i>                | carcinoembryonic antigen related cell adhesion molecule 1      | 2.058       | X                          | 0.00901243 |
| <i>KLK10</i>                  | kallikrein related peptidase 10                                | 2.053       | X                          | 0.01317932 |



| Upregulated genes (continued) |                                                           |        |   |            |
|-------------------------------|-----------------------------------------------------------|--------|---|------------|
| <i>CFTR</i>                   | cystic fibrosis transmembrane conductance regulator       | 2.042  | X | 0.00356923 |
| <i>BRCA1</i>                  | BRCA1, DNA repair associated                              | 2.039  | X | 0.01462255 |
| <i>REL</i>                    | REL proto-oncogene, NF-kB subunit                         | 2.035  | X | 0.00592357 |
| <i>PRNCR1</i>                 | prostate cancer associated non-coding RNA 1               | 2.012  | X | 0.02396165 |
| Downregulated genes (316)     |                                                           |        |   |            |
| <i>THSD4</i>                  | thrombospondin type 1 domain containing 4                 | -2.002 | X | 0.01492104 |
| <i>BHLHE40</i>                | basic helix-loop-helix family member e40                  | -2.005 | X | 0.00814725 |
| <i>CDCP1</i>                  | CUB domain containing protein 1                           | -2.010 | X | 0.01604839 |
| <i>APOL1</i>                  | apolipoprotein L1                                         | -2.019 | X | 0.00783566 |
| <i>FAM162A</i>                | family with sequence similarity 162 member A              | -2.027 | X | 0.01480962 |
| <i>ALDOC</i>                  | aldolase, fructose-bisphosphate C                         | -2.029 | X | 0.00584082 |
| <i>HMOX1</i>                  | heme oxygenase 1                                          | -2.045 | X | 0.00895015 |
| <i>RETSAT</i>                 | retinol saturase                                          | -2.055 | X | 0.01144362 |
| <i>RHOD</i>                   | ras homolog family member D                               | -2.057 | X | 0.04569568 |
| <i>TDP2</i>                   | tyrosyl-DNA phosphodiesterase 2                           | -2.075 | X | 0.00510779 |
| <i>SVIL</i>                   | supervillin                                               | -2.100 | X | 0.01396687 |
| <i>CAPRN2</i>                 | caprin family member 2                                    | -2.105 | X | 0.00742221 |
| <i>C4orf3</i>                 | chromosome 4 open reading frame 3                         | -2.134 | X | 0.00220732 |
| <i>EHD2</i>                   | EH domain containing 2                                    | -2.151 | X | 0.00220372 |
| <i>PKD1</i>                   | pyruvate dehydrogenase kinase 1                           | -2.152 | X | 0.00521454 |
| <i>SLC23A2</i>                | solute carrier family 23 member 2                         | -2.152 | X | 0.00600987 |
| <i>LAMA3</i>                  | laminin subunit alpha 3                                   | -2.163 | X | 0.00315835 |
| <i>ALDOA</i>                  | aldolase, fructose-bisphosphate A                         | -2.164 | X | 0.00615633 |
| <i>ABL2</i>                   | ABL proto-oncogene 2, non-receptor tyrosine kinase        | -2.170 | X | 0.00223627 |
| <i>MGST3</i>                  | microsomal glutathione S-transferase 3                    | -2.170 | X | 0.01961326 |
| <i>TNFRSF10D</i>              | TNF receptor superfamily member 10d                       | -2.188 | X | 0.0443514  |
| <i>SDCBP2</i>                 | syndecan binding protein 2                                | -2.190 | X | 0.00197154 |
| <i>TNS1</i>                   | tensin 1                                                  | -2.194 | X | 0.00228339 |
| <i>MT1E</i>                   | metallothionein 1E                                        | -2.208 | X | 0.00087618 |
| <i>SERTAD1</i>                | SERTA domain containing 1                                 | -2.220 | X | 0.00724439 |
| <i>MT1X</i>                   | metallothionein 1X                                        | -2.222 | X | 0.00064578 |
| <i>SLC16A3</i>                | solute carrier family 16 member 3                         | -2.235 | X | 0.0008612  |
| <i>SLC29A4</i>                | solute carrier family 29 member 4                         | -2.249 | X | 0.00072412 |
| <i>DPP4</i>                   | dipeptidyl peptidase                                      | -2.250 | X | 0.00891828 |
| <i>TP53INP2</i>               | tumor protein p53 inducible nuclear protein 2             | -2.250 | X | 0.00129165 |
| <i>CDA</i>                    | cytidine deaminase                                        | -2.267 | X | 0.01383433 |
| <i>CA12</i>                   | carbonic anhydrase 12                                     | -2.270 | X | 0.00039074 |
| <i>CDC42EP3</i>               | CDC42 effector protein 3                                  | -2.294 | X | 0.0027315  |
| <i>RHOF</i>                   | ras homolog family member F, filopodia associated         | -2.324 | X | 0.00071721 |
| <i>DAPK1</i>                  | death associated protein kinase 1                         | -2.326 | X | 0.00053817 |
| <i>CEACAM5</i>                | carcinoembryonic antigen related cell adhesion molecule 5 | -2.348 | X | 0.00037871 |
| <i>FUT11</i>                  | fucosyltransferase 11                                     | -2.357 | X | 0.0004344  |
| <i>CLCF1</i>                  | cardiotrophin-like cytokine factor 1                      | -2.391 | X | 0.00120931 |
| <i>PGK1</i>                   | phosphoglycerate kinase 1                                 | -2.395 | X | 0.0005445  |
| <i>PLIN2</i>                  | perilipin 2                                               | -2.398 | X | 0.00020336 |
| <i>GAPDHPI</i>                | glyceraldehyde-3-phosphate dehydrogenase pseudogene 1     | -2.410 | X | 0.00171216 |
| <i>GLS</i>                    | glutaminase                                               | -2.429 | X | 0.00028634 |
| <i>VLDLR</i>                  | very low density lipoprotein receptor                     | -2.435 | X | 0.00835659 |
| <i>ISG20</i>                  | interferon stimulated exonuclease gene 20                 | -2.464 | X | 0.00237079 |
| <i>KLF4</i>                   | Kruppel like factor 4                                     | -2.467 | X | 0.03625246 |
| <i>ARL2BP</i>                 | ADP ribosylation factor like GTPase 2 binding protein     | -2.512 | X | 0.00746954 |
| <i>P4HA1</i>                  | prolyl 4-hydroxylase subunit alpha 1                      | -2.520 | X | 2.66E-05   |
| <i>GAB2</i>                   | GRB2 associated binding protein 2                         | -2.540 | X | 0.00112381 |
| <i>DUSP4</i>                  | dual specificity phosphatase 4                            | -2.558 | X | 2.93E-05   |
| <i>PTPRM</i>                  | protein tyrosine phosphatase, receptor type M             | -2.567 | X | 0.02621532 |
| <i>ADM</i>                    | adrenomedullin                                            | -2.580 | X | 0.00042375 |
| <i>LAMC2</i>                  | laminin subunit gamma 2                                   | -2.593 | X | 9.96E-05   |
| <i>MYO15B</i>                 | myosin XVb                                                | -2.608 | X | 0.00397863 |
| <i>ELL2</i>                   | elongation factor for RNA polymerase II 2                 | -2.614 | X | 6.08E-05   |
| <i>NTSR1</i>                  | neurotensin receptor 1                                    | -2.633 | X | 3.37E-05   |
| <i>PTRF</i>                   | polymerase I and transcript release factor                | -2.642 | X | 4.84E-05   |
| <i>AK4</i>                    | adenylate kinase 4                                        | -2.656 | X | 0.0003872  |
| <i>SFN</i>                    | stratifin                                                 | -2.664 | X | 2.72E-05   |
| <i>FOSL1</i>                  | FOS like 1, AP-1 transcription factor subunit             | -2.665 | X | 0.00023341 |
| <i>ATP2B4</i>                 | ATPase plasma membrane Ca2+ transporting 4                | -2.726 | X | 2.04E-05   |

| Downregulated genes (continued) |                                                                                 |        |   |            |
|---------------------------------|---------------------------------------------------------------------------------|--------|---|------------|
| <i>LDHA</i>                     | lactate dehydrogenase A                                                         | -2.736 | X | 2.63E-05   |
| <i>NLRC5</i>                    | NLR family CARD domain containing 5                                             | -2.794 | X | 0.01205825 |
| <i>TUSC3</i>                    | tumor suppressor candidate 3                                                    | -2.795 | X | 0.01160377 |
| <i>ANXA1</i>                    | annexin A1                                                                      | -2.861 | X | 4.57E-06   |
| <i>PLOD2</i>                    | procollagen-lysine,2-oxoglutarate 5-dioxygenase 2                               | -2.884 | X | 2.26E-07   |
| <i>ALCAM</i>                    | activated leukocyte cell adhesion molecule                                      | -2.982 | X | 4.00E-05   |
| <i>GRB10</i>                    | growth factor receptor bound protein 10                                         | -2.985 | X | 0.00889671 |
| <i>SPIRE1</i>                   | spire type actin nucleation factor 1                                            | -2.989 | X | 2.49E-05   |
| <i>OASL</i>                     | 2'-5'-oligoadenylate synthetase like                                            | -2.999 | X | 5.12E-06   |
| <i>IFIT2</i>                    | interferon induced protein with tetratricopeptide repeats 2                     | -3.002 | X | 9.43E-07   |
| <i>GJB3</i>                     | gap junction protein beta 3                                                     | -3.003 | X | 7.53E-05   |
| <i>LAT</i>                      | linker for activation of T-cells                                                | -3.145 | X | 0.00245147 |
| <i>AGR2</i>                     | anterior gradient 2, protein disulphide isomerase family member                 | -3.193 | X | 2.46E-08   |
| <i>MID2</i>                     | midline 2                                                                       | -3.218 | X | 0.00204036 |
| <i>DUSP10</i>                   | dual specificity phosphatase 10                                                 | -3.238 | X | 0.0325711  |
| <i>LOC645553</i>                | uncharacterized LOC645553                                                       | -3.314 | X | 5.08E-08   |
| <i>IGFBP6</i>                   | insulin like growth factor binding protein 6                                    | -3.316 | X | 1.15E-07   |
| <i>TACCI</i>                    | transforming acidic coiled-coil containing protein 1                            | -3.422 | X | 0.00010096 |
| <i>CTSL</i>                     | cathepsin L                                                                     | -3.442 | X | 2.03E-08   |
| <i>LOC107987206</i>             | uncharacterized LOC107987206                                                    | -3.603 |   | 8.12E-10   |
| <i>ZSCAN12P1</i>                | zinc finger and SCAN domain containing 12 pseudogene 1                          | -3.647 | X | 1.41E-06   |
| <i>TUBB3</i>                    | tubulin beta 3 class III                                                        | -3.816 | X | 0.04521746 |
| <i>BNIP3L</i>                   | BCL2 interacting protein 3 like                                                 | -3.817 | X | 5.32E-08   |
| <i>AKR1C1</i>                   | aldo-keto reductase family 1 member C1                                          | -3.835 | X | 1.40E-09   |
| <i>SLPI</i>                     | secretory leukocyte peptidase inhibitor                                         | -3.847 | X | 0.01711276 |
| <i>PAG1</i>                     | phosphoprotein membrane anchor with glycosphingolipid microdomains 1            | -3.912 | X | 0.00160309 |
| <i>C6orf223</i>                 | chromosome 6 open reading frame 223                                             | -4.006 | X | 1.20E-10   |
| <i>SLC11A2</i>                  | solute carrier family 11 member 2                                               | -4.054 | X | 5.58E-12   |
| <i>FUT8</i>                     | fucosyltransferase 8                                                            | -4.127 | X | 0.04599991 |
| <i>ALDH3A1</i>                  | aldehyde dehydrogenase 3 family member A1                                       | -4.139 | X | 3.51E-12   |
| <i>DHRS9</i>                    | dehydrogenase/reductase 9                                                       | -4.156 | X | 1.19E-06   |
| <i>AKAP12</i>                   | A-kinase anchoring protein 12                                                   | -4.221 | X | 0.00685784 |
| <i>P4HA2</i>                    | prolyl 4-hydroxylase subunit alpha 2                                            | -4.287 | X | 6.27E-13   |
| <i>GBE1</i>                     | 1,4-alpha-glucan branching enzyme 1                                             | -4.479 | X | 3.39E-08   |
| <i>CITED2</i>                   | Cbp/p300 interacting transactivator with Glu/Asp rich carboxy-terminal domain 2 | -4.659 | X | 0.00113304 |
| <i>PFKFB3</i>                   | 6-phosphofructo-2-kinase/fructose-2,6-biphosphatase 3                           | -4.697 | X | 3.91E-15   |
| <i>MT2A</i>                     | metallothionein 2A                                                              | -4.818 | X | 1.25E-14   |
| <i>ADGRG6</i>                   | adhesion G protein-coupled receptor G6                                          | -4.848 | X | 0.04234548 |
| <i>ENO2</i>                     | enolase 2                                                                       | -4.881 | X | 5.93E-14   |
| <i>LOC105378179</i>             | uncharacterized LOC105378179                                                    | -4.997 |   | 4.28E-14   |
| <i>FSCN1</i>                    | fascin actin-bundling protein 1                                                 | -5.040 | X | 0.00480852 |
| <i>HDAC9</i>                    | histone deacetylase 9                                                           | -5.060 | X | 0.0070314  |
| <i>ANXA13</i>                   | annexin A13                                                                     | -5.148 | X | 0.03690048 |
| <i>ZNF114</i>                   | zinc finger protein 114                                                         | -5.189 | X | 0.01737084 |
| <i>PLCB4</i>                    | phospholipase C beta 4                                                          | -5.266 | X | 0.0451635  |
| <i>IL1RN</i>                    | interleukin 1 receptor antagonist                                               | -5.288 | X | 5.92E-13   |
| <i>AKR1B1</i>                   | aldo-keto reductase family 1 member B                                           | -5.321 | X | 0.00017875 |
| <i>APLP1</i>                    | amyloid beta precursor like protein 1                                           | -5.363 | X | 0.0395862  |
| <i>NWD2</i>                     | NACHT and WD repeat domain containing 2                                         | -5.379 | X | 0.04345234 |
| <i>CDH17</i>                    | cadherin 17                                                                     | -5.708 | X | 0.00093411 |
| <i>NXPH4</i>                    | neurexophilin 4                                                                 | -5.720 | X | 0.00888243 |
| <i>FADS1</i>                    | fatty acid desaturase 1                                                         | -5.844 | X | 2.59E-06   |
| <i>TTC28</i>                    | tetratricopeptide repeat domain 28                                              | -5.851 | X | 0.01686265 |
| <i>LOC105374003</i>             | uncharacterized LOC105374003                                                    | -5.903 | X | 0.01802239 |
| <i>AXL</i>                      | AXL receptor tyrosine kinase                                                    | -5.965 | X | 0.04551514 |
| <i>KRT17</i>                    | keratin 17                                                                      | -6.018 | X | 0.00030478 |
| <i>UCA1</i>                     | urothelial cancer associated 1 (non-protein coding)                             | -6.046 | X | 1.37E-17   |
| <i>EYA4</i>                     | EYA transcriptional coactivator and phosphatase 4                               | -6.133 | X | 0.02043978 |
| <i>NCF2</i>                     | neutrophil cytosolic factor 2                                                   | -6.217 | X | 0.00081333 |
| <i>CA9</i>                      | carbonic anhydrase 9                                                            | -6.234 | X | 2.30E-17   |
| <i>LONRF2</i>                   | LON peptidase N-terminal domain and ring finger 2                               | -6.325 | X | 0.02503702 |
| <i>NDRG1</i>                    | N-myc downstream regulated 1                                                    | -6.333 | X | 2.71E-20   |
| <i>AHNAK2</i>                   | AHNAK nucleoprotein 2                                                           | -6.590 | X | 8.42E-19   |

| Downregulated genes (continued) |                                                           |         |   |            |
|---------------------------------|-----------------------------------------------------------|---------|---|------------|
| <i>EGLN3</i>                    | egl-9 family hypoxia inducible factor 3                   | -6.646  | X | 2.65E-08   |
| <i>PFKFB4</i>                   | 6-phosphofructo-2-kinase/fructose-2,6-biphosphatase 4     | -6.673  | X | 8.81E-09   |
| <i>RNF144A</i>                  | ring finger protein 144A                                  | -6.720  | X | 0.03389489 |
| <i>CHST11</i>                   | carbohydrate sulfotransferase 11                          | -6.739  | X | 0.01964322 |
| <i>KIAA1462</i>                 | KIAA1462                                                  | -6.960  | X | 6.21E-14   |
| <i>PTPRU</i>                    | protein tyrosine phosphatase, receptor type U             | -6.980  | X | 0.04781902 |
| <i>HHIPL2</i>                   | HHIP like 2                                               | -7.224  | X | 0.02805903 |
| <i>MID1</i>                     | midline 1                                                 | -7.325  | X | 0.00033458 |
| <i>IL6R</i>                     | interleukin 6 receptor                                    | -7.422  | X | 1.73E-07   |
| <i>CST1</i>                     | cystatin SN                                               | -7.428  | X | 3.35E-18   |
| <i>WWTR1</i>                    | WW domain containing transcription regulator 1            | -7.594  | X | 0.00016976 |
| <i>C2orf72</i>                  | chromosome 2 open reading frame 72                        | -7.609  | X | 0.01239241 |
| <i>TET1</i>                     | tet methylcytosine dioxygenase 1                          | -7.668  | X | 0.01176597 |
| <i>SPTSSB</i>                   | serine palmitoyltransferase small subunit B               | -7.782  | X | 1.58E-08   |
| <i>OSMR</i>                     | oncostatin M receptor                                     | -7.791  | X | 0.00195094 |
| <i>NRP1</i>                     | neuropilin 1                                              | -7.935  | X | 3.70E-13   |
| <i>RAET1L</i>                   | retinoic acid early transcript 1L                         | -8.289  | X | 0.04967792 |
| <i>TM4SF19</i>                  | transmembrane 4 L six family member 19                    | -8.626  | X | 0.03241145 |
| <i>IL36RN</i>                   | interleukin 36 receptor antagonist                        | -8.711  | X | 0.03246965 |
| <i>CAV2</i>                     | caveolin 2                                                | -8.955  | X | 0.00044326 |
| <i>LOC105375172</i>             | uncharacterized LOC105375172                              | -9.211  | X | 0.00541484 |
| <i>BTBD11</i>                   | BTB domain containing 11                                  | -9.268  | X | 0.00340314 |
| <i>ADGRL2</i>                   | adhesion G protein-coupled receptor L2                    | -9.277  |   | 0.00933567 |
| <i>SPRR3</i>                    | small proline rich protein 3                              | -9.623  | X | 3.11E-10   |
| <i>PDE7B</i>                    | phosphodiesterase 7B                                      | -9.683  | X | 0.01506336 |
| <i>FCGBP</i>                    | Fc fragment of IgG binding protein                        | -9.721  | X | 0.00112183 |
| <i>MIR210HG</i>                 | MIR210 host gene                                          | -9.789  | X | 0.00207403 |
| <i>PAPPA</i>                    | pappalysin 1                                              | -10.117 | X | 0.00152656 |
| <i>GALNT5</i>                   | polypeptide N-acetylgalactosaminyltransferase 5           | -10.173 | X | 8.17E-06   |
| <i>ST6GAL1</i>                  | ST6 beta-galactoside alpha-2,6-sialyltransferase 1        | -10.262 | X | 0.02175511 |
| <i>KIAA0319</i>                 | KIAA0319                                                  | -10.710 | X | 1.10E-05   |
| <i>C3</i>                       | complement C3                                             | -10.712 | X | 8.44E-14   |
| <i>PHOSPHO2-KLHL23</i>          | PHOSPHO2-KLHL23 readthrough                               | -10.932 |   | 0.01012828 |
| <i>ANGPTL4</i>                  | angiopoietin like 4                                       | -10.989 | X | 8.40E-08   |
| <i>COL6A1</i>                   | collagen type VI alpha 1 chain                            | -11.254 | X | 8.53E-07   |
| <i>DPYSL3</i>                   | dihydropyrimidinase like 3                                | -11.855 | X | 0.00170066 |
| <i>RAB3B</i>                    | RAB3B, member RAS oncogene family                         | -11.875 | X | 0.00087627 |
| <i>ANPEP</i>                    | alanyl aminopeptidase, membrane                           | -12.004 | X | 0.00113304 |
| <i>MUC16</i>                    | mucin 16, cell surface associated                         | -12.864 | X | 1.77E-06   |
| <i>DKK1</i>                     | dickkopf WNT signaling pathway inhibitor 1                | -12.868 | X | 0.01518642 |
| <i>BNIP3</i>                    | BCL2 interacting protein 3                                | -13.200 | X | 0.00017367 |
| <i>NRP2</i>                     | neuropilin 2                                              | -14.036 | X | 0.00835659 |
| <i>ARL4C</i>                    | ADP ribosylation factor like GTPase 4C                    | -14.856 | X | 3.45E-12   |
| <i>COL5A2</i>                   | collagen type V alpha 2 chain                             | -15.236 | X | 6.62E-06   |
| <i>RHOBTB1</i>                  | Rho related BTB domain containing 1                       | -16.083 | X | 0.0031665  |
| <i>CD109</i>                    | CD109 molecule                                            | -16.117 | X | 5.66E-06   |
| <i>GPSM1</i>                    | G-protein signaling modulator 1                           | -16.207 | X | 0.00012942 |
| <i>IGFBP1</i>                   | insulin like growth factor binding protein 1              | -16.359 | X | 0.00021396 |
| <i>CEACAM6</i>                  | carcinoembryonic antigen related cell adhesion molecule 6 | -16.377 | X | 2.67E-41   |
| <i>CPS1</i>                     | carbamoyl-phosphate synthase 1                            | -17.267 | X | 1.27E-05   |
| <i>PPFIA4</i>                   | PTPRF interacting protein alpha 4                         | -17.462 | X | 0.0001341  |
| <i>BDNF</i>                     | brain derived neurotrophic factor                         | -18.098 | X | 0.00055341 |
| <i>BCAT1</i>                    | branched chain amino acid transaminase 1                  | -18.732 | X | 0.04137557 |
| <i>LINC00520</i>                | long intergenic non-protein coding RNA 520                | -18.863 | X | 0.00665282 |
| <i>SPP1</i>                     | secreted phosphoprotein 1                                 | -19.289 | X | 4.59E-10   |
| <i>PTPRS</i>                    | protein tyrosine phosphatase, receptor type S             | -19.328 | X | 0.00031153 |
| <i>HRNR</i>                     | hornerin                                                  | -19.351 | X | 0.00663543 |
| <i>LGSN</i>                     | lensin, lens protein with glutamine synthetase domain     | -19.485 | X | 0.00033458 |
| <i>SETBP1</i>                   | SET binding protein 1                                     | -19.753 | X | 0.00043959 |
| <i>NR3C1</i>                    | nuclear receptor subfamily 3 group C member 1             | -20.319 |   | 1.23E-05   |
| <i>PLCL2</i>                    | phospholipase C like 2                                    | -20.628 |   | 0.00016409 |
| <i>TM4SF18</i>                  | transmembrane 4 L six family member 18                    | -21.166 | X | 0.00021202 |
| <i>NDUFA4L2</i>                 | NDUFA4, mitochondrial complex associated like 2           | -21.211 | X | 1.63E-20   |
| <i>ABCC2</i>                    | ATP binding cassette subfamily C member 2                 | -21.425 | X | 3.64E-24   |

| Downregulated genes (continued) |                                                                  |          |   |            |
|---------------------------------|------------------------------------------------------------------|----------|---|------------|
| <i>CAMK1D</i>                   | calcium/calmodulin dependent protein kinase ID                   | -21.445  | X | 0.03147727 |
| <i>CACNA1H</i>                  | calcium voltage-gated channel subunit alpha1 H                   | -22.426  | X | 0.03101992 |
| <i>LOC102723490</i>             | uncharacterized LOC102723490                                     | -22.547  | X | 0.0025194  |
| <i>TMEM246</i>                  | transmembrane protein 246                                        | -22.725  | X | 0.03275059 |
| <i>ITGA5</i>                    | integrin subunit alpha 5                                         | -22.855  | X | 7.53E-05   |
| <i>ZNF462</i>                   | zinc finger protein 462                                          | -23.183  | X | 0.00983955 |
| <i>RNF217</i>                   | ring finger protein 217                                          | -23.245  | X | 7.53E-05   |
| <i>BDKRB2</i>                   | bradykinin receptor B2                                           | -23.272  | X | 0.01108023 |
| <i>ZNF618</i>                   | zinc finger protein 618                                          | -24.593  | X | 5.60E-06   |
| <i>EML1</i>                     | echinoderm microtubule associated protein like 1                 | -24.799  | X | 0.00556706 |
| <i>NAV3</i>                     | neuron navigator 3                                               | -25.058  | X | 3.06E-05   |
| <i>BASP1</i>                    | brain abundant membrane attached signal protein 1                | -25.295  | X | 2.26E-05   |
| <i>SYT1</i>                     | synaptotagmin 1                                                  | -25.391  | X | 1.27E-06   |
| <i>NEBL</i>                     | nebullette                                                       | -25.421  | X | 0.00575752 |
| <i>ZNF365</i>                   | zinc finger protein 365                                          | -26.097  | X | 3.60E-06   |
| <i>CAVI</i>                     | caveolin 1                                                       | -26.821  | X | 0.00043959 |
| <i>STOM</i>                     | stomatin                                                         | -27.227  | X | 1.23E-05   |
| <i>STC2</i>                     | stanniocalcin 2                                                  | -27.601  | X | 1.84E-06   |
| <i>CALD1</i>                    | caldesmon 1                                                      | -29.834  | X | 5.11E-06   |
| <i>VTN</i>                      | vitronectin                                                      | -30.994  | X | 2.99E-06   |
| <i>SPRR1A</i>                   | small proline rich protein 1A                                    | -31.428  | X | 3.97E-12   |
| <i>NRCAM</i>                    | neuronal cell adhesion molecule                                  | -33.122  | X | 9.16E-10   |
| <i>CNNM1</i>                    | cyclin and CBS domain divalent metal cation transport mediator 1 | -33.659  | X | 1.83E-06   |
| <i>ANTXR1</i>                   | anthrax toxin receptor 1                                         | -34.872  | X | 1.81E-06   |
| <i>NBEA</i>                     | neurobeachin                                                     | -35.223  | X | 7.53E-05   |
| <i>LRP4</i>                     | LDL receptor related protein 4                                   | -35.843  | X | 6.08E-05   |
| <i>SPRR1B</i>                   | small proline rich protein 1B                                    | -37.449  | X | 7.14E-37   |
| <i>PRICKLE2</i>                 | prickle planar cell polarity protein 2                           | -37.696  | X | 2.92E-05   |
| <i>CHST15</i>                   | carbohydrate sulfotransferase 15                                 | -37.801  | X | 2.44E-05   |
| <i>SGK3</i>                     | serum/glucocorticoid regulated kinase family member 3            | -39.071  | X | 0.00197165 |
| <i>ELOVL5</i>                   | ELOVL fatty acid elongase 5                                      | -39.790  | X | 1.60E-05   |
| <i>CNTNAP3B</i>                 | contactin associated protein-like 3B                             | -40.698  | X | 1.03E-05   |
| <i>PEG10</i>                    | paternally expressed 10                                          | -40.701  |   | 8.53E-09   |
| <i>LHX4-AS1</i>                 | LHX4 antisense RNA 1                                             | -41.193  | X | 0.03080333 |
| <i>CST6</i>                     | cystatin E/M                                                     | -41.950  | X | 0.04958711 |
| <i>QKI</i>                      | QKI, KH domain containing RNA binding                            | -45.291  | X | 3.60E-06   |
| <i>IGF2BP1</i>                  | insulin like growth factor 2 mRNA binding protein 1              | -45.485  | X | 1.28E-07   |
| <i>THSD7A</i>                   | thrombospondin type 1 domain containing 7A                       | -48.158  | X | 4.87E-10   |
| <i>CLU</i>                      | clusterin                                                        | -49.319  | X | 1.32E-08   |
| <i>MAP1B</i>                    | microtubule associated protein 1B                                | -51.693  |   | 2.20E-36   |
| <i>GLI2</i>                     | GLI family zinc finger 2                                         | -55.624  | X | 0.02951303 |
| <i>DENND2C</i>                  | DENN domain containing 2C                                        | -58.618  | X | 0.00983955 |
| <i>LOC105376938</i>             | uncharacterized LOC105376938                                     | -61.571  | X | 0.03301083 |
| <i>SLC2A3</i>                   | solute carrier family 2 member 3                                 | -63.692  | X | 1.15E-07   |
| <i>POC1B-GALNT4</i>             | POC1B-GALNT4 readthrough                                         | -65.676  | X | 0.03398009 |
| <i>IL36B</i>                    | interleukin 36, beta                                             | -71.181  | X | 0.0029466  |
| <i>FGA</i>                      | fibrinogen alpha chain                                           | -74.507  | X | 2.96E-11   |
| <i>KRT81</i>                    | keratin 81                                                       | -77.939  | X | 2.49E-08   |
| <i>UNC5C</i>                    | unc-5 netrin receptor C                                          | -78.801  | X | 0.01480962 |
| <i>VIM</i>                      | vimentin                                                         | -79.670  | X | 6.83E-27   |
| <i>PWAR5</i>                    | Prader Willi/Angelman region RNA 5                               | -84.035  | X | 0.03275059 |
| <i>TM4SF20</i>                  | transmembrane 4 L six family member 20                           | -87.285  | X | 0.03718025 |
| <i>NTRK3</i>                    | neurotrophic receptor tyrosine kinase 3                          | -88.269  | X | 0.01076595 |
| <i>KDM5D</i>                    | lysine demethylase 5D                                            | -88.382  | X | 0.01349776 |
| <i>BEX3</i>                     | brain expressed X-linked 3                                       | -88.495  | X | 0.01677241 |
| <i>RIMKLB</i>                   | ribosomal modification protein rimK like family member B         | -88.616  | X | 0.02134754 |
| <i>ANKRD18B</i>                 | ankyrin repeat domain 18B                                        | -88.720  | X | 0.01376336 |
| <i>TIMD4</i>                    | T-cell immunoglobulin and mucin domain containing 4              | -88.838  | X | 0.03379727 |
| <i>ZNF605</i>                   | zinc finger protein 605                                          | -92.952  | X | 0.00851734 |
| <i>BPIFB1</i>                   | BPI fold containing family B member 1                            | -93.539  | X | 0.02883885 |
| <i>FN1</i>                      | fibronectin 1                                                    | -95.301  |   | 1.81E-77   |
| <i>TFF2</i>                     | trefoil factor 2                                                 | -96.688  | X | 0.00036859 |
| <i>KCNE4</i>                    | potassium voltage-gated channel subfamily E regulatory subunit 4 | -97.994  | X | 0.01406747 |
| <i>TSPYL5</i>                   | TSPY like 5                                                      | -98.239  | X | 0.02411357 |
| <i>PHLDB2</i>                   | pleckstrin homology like domain family B member 2                | -100.269 | X | 0.00170066 |

| Downregulated genes (continued) |                                                               |           |   |            |
|---------------------------------|---------------------------------------------------------------|-----------|---|------------|
| <i>HSPB8</i>                    | heat shock protein family B (small) member 8                  | -100.351  | X | 0.00029321 |
| <i>TDRP</i>                     | testis development related protein                            | -101.867  | X | 0.00221468 |
| <i>GALC</i>                     | galactosylceramidase                                          | -102.573  | X | 0.00895015 |
| <i>SIRPA</i>                    | signal regulatory protein alpha                               | -106.261  | X | 0.0046571  |
| <i>CXCL5</i>                    | C-X-C motif chemokine ligand 5                                | -107.246  |   | 3.91E-43   |
| <i>MAP9</i>                     | microtubule associated protein 9                              | -107.265  | X | 0.00746954 |
| <i>ABCA12</i>                   | ATP binding cassette subfamily A member 12                    | -107.269  | X | 0.00753868 |
| <i>RTEL1-TNFRSF6B</i>           | RTEL1-TNFRSF6B readthrough (NMD candidate)                    | -110.140  | X | 0.00010922 |
| <i>RPS4Y1</i>                   | ribosomal protein S4, Y-linked 1                              | -111.012  | X | 0.00089059 |
| <i>SPX</i>                      | spexin hormone                                                | -111.060  | X | 0.00488765 |
| <i>ANKRD30A</i>                 | ankyrin repeat domain 30A                                     | -111.585  | X | 0.00269285 |
| <i>PDE4B</i>                    | phosphodiesterase 4B                                          | -111.960  | X | 0.00618375 |
| <i>SLFN11</i>                   | schlafen family member 11                                     | -114.975  | X | 0.00418215 |
| <i>AMOTL1</i>                   | angiomin like 1                                               | -115.600  | X | 0.00057487 |
| <i>SLC4A4</i>                   | solute carrier family 4 member 4                              | -119.861  | X | 0.00087606 |
| <i>CHGB</i>                     | chromogranin B                                                | -120.970  | X | 0.00176291 |
| <i>RAB34</i>                    | RAB34, member RAS oncogene family                             | -122.055  | X | 0.00089059 |
| <i>UCHL1</i>                    | ubiquitin C-terminal hydrolase L1                             | -124.925  | X | 8.04E-12   |
| <i>FAM127A</i>                  | family with sequence similarity 127 member A                  | -125.537  | X | 0.00109587 |
| <i>CDH6</i>                     | cadherin 6                                                    | -129.443  | X | 0.00018308 |
| <i>PPP1R3C</i>                  | protein phosphatase 1 regulatory subunit 3C                   | -134.673  | X | 0.00042375 |
| <i>LINC00473</i>                | long intergenic non-protein coding RNA 473                    | -136.155  | X | 0.00062936 |
| <i>GPRIN2</i>                   | G protein regulated inducer of neurite outgrowth 2            | -141.783  | X | 5.38E-05   |
| <i>C8orf4</i>                   | chromosome 8 open reading frame 4                             | -143.223  | X | 4.93E-05   |
| <i>CP</i>                       | ceruloplasmin                                                 | -146.505  | X | 1.00E-44   |
| <i>SNURF</i>                    | SNRPN upstream reading frame                                  | -147.990  | X | 4.51E-05   |
| <i>RSPO3</i>                    | R-spondin 3                                                   | -148.087  | X | 5.38E-05   |
| <i>FGFR1</i>                    | fibroblast growth factor receptor 1                           | -151.781  | X | 2.63E-05   |
| <i>MPDZ</i>                     | multiple PDZ domain crumbs cell polarity complex component    | -152.868  | X | 5.13E-05   |
| <i>EPDR1</i>                    | ependymin related 1                                           | -156.984  | X | 1.27E-05   |
| <i>THBD</i>                     | thrombomodulin                                                | -157.366  | X | 2.72E-05   |
| <i>FADS2</i>                    | fatty acid desaturase 2                                       | -161.611  | X | 3.40E-16   |
| <i>CPPED1</i>                   | calcineurin like phosphoesterase domain containing 1          | -169.767  | X | 1.03E-05   |
| <i>EVC</i>                      | EvC ciliary complex subunit 1                                 | -171.180  | X | 8.01E-06   |
| <i>MUC5B</i>                    | mucin 5B, oligomeric mucus/gel-forming                        | -175.440  |   | 2.88E-88   |
| <i>USP9Y</i>                    | ubiquitin specific peptidase 9, Y-linked                      | -176.125  | X | 1.08E-05   |
| <i>COL4A6</i>                   | collagen type IV alpha 6 chain                                | -179.304  | X | 1.70E-06   |
| <i>PNMA2</i>                    | paraneoplastic Ma antigen 2                                   | -184.355  | X | 2.97E-06   |
| <i>GABRB3</i>                   | gamma-aminobutyric acid type A receptor beta3 subunit         | -194.100  | X | 7.56E-07   |
| <i>LOC105374020</i>             | uncharacterized LOC105374020                                  | -198.710  | X | 4.88E-07   |
| <i>STC1</i>                     | stanniocalcin 1                                               | -203.649  | X | 6.84E-07   |
| <i>SCN9A</i>                    | sodium voltage-gated channel alpha subunit 9                  | -203.651  | X | 6.84E-07   |
| <i>DDX3Y</i>                    | DEAD-box helicase 3, Y-linked                                 | -208.229  | X | 4.19E-07   |
| <i>CNTNAP3</i>                  | contactin associated protein-like 3                           | -222.186  | X | 1.47E-07   |
| <i>LOC100505817</i>             | uncharacterized LOC100505817                                  | -226.118  | X | 1.22E-07   |
| <i>C20orf194</i>                | chromosome 20 open reading frame 194                          | -229.311  | X | 1.16E-07   |
| <i>LRRK2</i>                    | leucine rich repeat kinase 2                                  | -236.285  | X | 7.92E-08   |
| <i>ALPK2</i>                    | alpha kinase 2                                                | -285.625  | X | 9.21E-09   |
| <i>NRG1</i>                     | neuregulin 1                                                  | -288.114  | X | 1.02E-08   |
| <i>CPLX2</i>                    | complexin 2                                                   | -322.533  |   | 9.36E-40   |
| <i>BMPRI1B</i>                  | bone morphogenetic protein receptor type 1B                   | -333.784  | X | 3.77E-09   |
| <i>FGG</i>                      | fibrinogen gamma chain                                        | -339.996  | X | 2.13E-09   |
| <i>TBX18</i>                    | T-box 18                                                      | -340.028  | X | 2.30E-09   |
| <i>FAM25A</i>                   | family with sequence similarity 25 member A                   | -349.578  |   | 6.41E-16   |
| <i>PCDH9</i>                    | protocadherin 9                                               | -362.916  | X | 1.84E-09   |
| <i>FXSD2</i>                    | FXSD domain containing ion transport regulator 2              | -376.908  | X | 8.01E-10   |
| <i>FGL1</i>                     | fibrinogen like 1                                             | -377.799  | X | 9.01E-10   |
| <i>HAVCR1</i>                   | hepatitis A virus cellular receptor 1                         | -395.865  | X | 6.62E-10   |
| <i>ST8SIA4</i>                  | ST8 alpha-N-acetylneuraminidase alpha-2,8-sialyltransferase 4 | -433.561  | X | 2.61E-10   |
| <i>COL4A5</i>                   | collagen type IV alpha 5 chain                                | -462.698  | X | 1.24E-10   |
| <i>TTL6</i>                     | tubulin tyrosine ligase like 6                                | -466.552  | X | 1.15E-10   |
| <i>FGB</i>                      | fibrinogen beta chain                                         | -523.943  | X | 2.63E-11   |
| <i>CNTN1</i>                    | contactin 1                                                   | -1831.878 |   | 8.47E-49   |
| <i>IGFBP3</i>                   | insulin like growth factor binding protein 3                  | -3217.287 |   | 4.52E-75   |



<sup>1</sup> Significant differences between Ground infected and uninfected cultures were determined according to an FDR < 0.05 and a minimum log<sub>2</sub> fold change of 1 or -1 (2-fold increase or decrease in expression, respectively). Log<sub>2</sub>-fold change values were converted to fold change in this table. Red shading indicates upregulation and blue shading indicates downregulation in the infected cultures relative to the uninfected cultures.

**Supplementary Table 7. Enrichment analysis of Ground HT-29 cultures: infected versus uninfected<sup>1</sup>**

Blue text indicates GO terms/pathways that were **unique** to the Ground infection. Black text indicates terms/pathways that were **commonly regulated** between the Flight and Ground infection.

| Category             | Term                                                    | Count | %     | Genes                                                                                              | Fold enrichment | P-value  | $-\log_{10}$ Benjamini |
|----------------------|---------------------------------------------------------|-------|-------|----------------------------------------------------------------------------------------------------|-----------------|----------|------------------------|
| <b>UPREGULATED</b>   |                                                         |       |       |                                                                                                    |                 |          |                        |
| Biological Process   | GO:0006954 inflammatory response                        | 13    | 22.03 | <i>IRAK2, CXCL1, NFKBIZ, CXCL3, CXCL2, CXCL8, TLR4, NFKB2, CXCL6, CCL20, REL, ZC3H12A, TNFAIP3</i> | 12.80           | 1.62E-10 | 7.075292654            |
| Biological Process   | GO:0071222 cellular response to lipopolysaccharide      | 7     | 11.86 | <i>LCN2, ICAM1, CCL20, CXCL8, ZC3H12A, TLR4, TNFAIP3</i>                                           | 23.12           | 4.66E-07 | 3.916979441            |
| Biological Process   | GO:0070098 chemokine-mediated signaling pathway         | 6     | 10.17 | <i>CXCL1, CCL20, CXCL3, CXCL2, CXCL8, CXCL6</i>                                                    | 31.53           | 1.12E-06 | 3.712328744            |
| Biological Process   | GO:0071356 cellular response to tumor necrosis factor   | 6     | 10.17 | <i>LCN2, ICAM1, CCL20, CXCL8, ZC3H12A, BRCA1</i>                                                   | 20.35           | 9.75E-06 | 2.897162531            |
| Biological Process   | GO:0007249 I-kappaB kinase/NF-kappaB signaling          | 5     | 8.47  | <i>IRAK2, REL, TLR4, NFKB2, BIRC3</i>                                                              | 31.10           | 1.80E-05 | 2.728936504            |
| Biological Process   | GO:0090023 positive regulation of neutrophil chemotaxis | 4     | 6.78  | <i>CXCL1, CXCL3, CXCL2, CXCL8</i>                                                                  | 67.85           | 2.50E-05 | 2.66526767             |
| Biological Process   | GO:0071347 cellular response to interleukin-1           | 5     | 8.47  | <i>LCN2, ICAM1, CCL20, CXCL8, ZC3H12A</i>                                                          | 26.28           | 3.51E-05 | 2.584909459            |
| Biological Process   | GO:0032496 response to lipopolysaccharide               | 6     | 10.17 | <i>CXCL1, CXCL3, CXCL2, TLR4, CXCL6, NFKB2</i>                                                     | 13.65           | 6.67E-05 | 2.363695209            |
| Biological Process   | GO:0002237 response to molecule of bacterial origin     | 3     | 5.08  | <i>CXCL2, CXCL8, TNFAIP3</i>                                                                       | 124.39          | 2.39E-04 | 1.863206726            |
| Biological Process   | GO:0071356 chemotaxis                                   | 5     | 8.47  | <i>CXCL1, CCL20, CXCL2, CXCL8, CXCL6</i>                                                           | 15.29           | 2.88E-04 | 1.828409596            |
| Biological Process   | GO:0060326 cell chemotaxis                              | 4     | 6.78  | <i>CXCL1, CCL20, CXCL2, CXCL6</i>                                                                  | 22.96           | 6.55E-04 | 1.515975567            |
| Biological Process   | GO:0006955 immune response                              | 7     | 11.86 | <i>CXCL1, CCL20, CXCL3, CXCL2, CXCL8, TLR4, CXCL6</i>                                              | 6.20            | 7.55E-04 | 1.492115608            |
| Cellular Component   | GO:0005615 extracellular space                          | 12    | 20.34 | <i>CXCL1, LCN2, ICAM1, HIST1H2BE, CCL20, CXCL3, CXCL2, CXCL8, CXCL6, PIGR, MCAM, TNFAIP2</i>       | 3.53            | 3.37E-04 | 1.484410284            |
| Molecular Function   | GO:0008009 chemokine activity                           | 6     | 10.17 | <i>CXCL1, CCL20, CXCL3, CXCL2, CXCL8, CXCL6</i>                                                    | 46.98           | 1.48E-07 | 4.772769617            |
| Molecular Function   | GO:0045236 CXCR chemokine receptor binding              | 4     | 6.78  | <i>CXCL1, CXCL3, CXCL2, CXCL6</i>                                                                  | 170.52          | 1.28E-06 | 4.137112083            |
| KEGG pathway         | hsa05134 Legionellosis                                  | 6     | 10.17 | <i>CXCL1, CXCL3, CXCL2, CXCL8, TLR4, NFKB2</i>                                                     | 26.36           | 2.11E-06 | 3.69257035             |
| KEGG pathway         | hsa04668 TNF signaling pathway                          | 7     | 11.86 | <i>CXCL1, ICAM1, CCL20, CXCL3, CXCL2, BIRC3, TNFAIP3</i>                                           | 15.52           | 3.51E-06 | 3.773534914            |
| KEGG pathway         | hsa05132 Salmonella infection                           | 6     | 10.17 | <i>CXCL1, CXCL3, CXCL2, CXCL8, TLR4, IFNGR1</i>                                                    | 17.15           | 1.79E-05 | 3.242148363            |
| KEGG pathway         | hsa04064 NF-kappa B signaling pathway                   | 6     | 10.17 | <i>ICAM1, CXCL8, TLR4, NFKB2, BIRC3, TNFAIP3</i>                                                   | 16.36           | 2.25E-05 | 3.267245909            |
| KEGG pathway         | hsa04621 NOD-like receptor signaling pathway            | 5     | 8.47  | <i>CXCL1, CXCL2, CXCL8, BIRC3, TNFAIP3</i>                                                         | 21.18           | 6.98E-05 | 2.873413913            |
| KEGG pathway         | hsa04060 Cytokine-cytokine receptor interaction         | 7     | 11.86 | <i>CXCL1, CCL20, CXCL3, CXCL2, CXCL8, CXCL6, IFNGR1</i>                                            | 6.83            | 3.58E-04 | 2.243603984            |
| KEGG pathway         | hsa05323 Rheumatoid arthritis                           | 5     | 8.47  | <i>ICAM1, CCL20, CXCL8, TLR4, CXCL6</i>                                                            | 13.48           | 4.05E-04 | 2.256552424            |
| KEGG pathway         | hsa04062 Chemokine signaling pathway                    | 6     | 10.17 | <i>CXCL1, CCL20, CXCL3, CXCL2, CXCL8, CXCL6</i>                                                    | 7.65            | 8.11E-04 | 2.01354949             |
| <b>DOWNREGULATED</b> |                                                         |       |       |                                                                                                    |                 |          |                        |
| Biological Process   | GO:0007155 cell adhesion                                | 23    | 7.28  | <i>NRP2, MPDZ, CNTNAP3B, PTPRS, VTN, PTPRU, SIRPA, COL4A6, APLP1, CDH6, ALCAM, KIAA1462,</i>       | 3.02            | 8.60E-06 | 1.842462087            |

|                           |                                              |    |       |                                                                                                                                                                                                                                                                                                                                                                                                                                                                                                                                                                                                                                                                      |       |          |             |
|---------------------------|----------------------------------------------|----|-------|----------------------------------------------------------------------------------------------------------------------------------------------------------------------------------------------------------------------------------------------------------------------------------------------------------------------------------------------------------------------------------------------------------------------------------------------------------------------------------------------------------------------------------------------------------------------------------------------------------------------------------------------------------------------|-------|----------|-------------|
|                           |                                              |    |       | <i>LAMA3, ITGA5, CDH17, CNTNAP3, CNTN1, COL6A1, LAMC2, ABL2, SPP1, FN1, MUC16</i>                                                                                                                                                                                                                                                                                                                                                                                                                                                                                                                                                                                    |       |          |             |
| <i>Biological Process</i> | GO:0001666 response to hypoxia               | 13 | 4.11  | <i>SLC11A2, LDHA, CAV1, ADM, CA9, PLOD2, HMOX1, EGLN3, BNIP3, DPP4, CITED2, ALDH3A1, ANGPTL4</i>                                                                                                                                                                                                                                                                                                                                                                                                                                                                                                                                                                     | 4.55  | 3.01E-05 | 1.601006259 |
| <i>Biological Process</i> | GO:0061621 canonical glycolysis              | 6  | 1.90  | <i>ALDOA, PFKFB4, PFKFB3, ALDOC, ENO2, PGK1</i>                                                                                                                                                                                                                                                                                                                                                                                                                                                                                                                                                                                                                      | 13.89 | 5.93E-05 | 1.484628112 |
| <i>Biological Process</i> | GO:0030198 extracellular matrix organization | 13 | 4.11  | <i>VTN, COL5A2, COL4A6, COL4A5, FGG, LAMA3, FGA, ITGA5, FGB, COL6A1, LAMC2, SPP1, FN1</i>                                                                                                                                                                                                                                                                                                                                                                                                                                                                                                                                                                            | 3.99  | 1.07E-04 | 1.356529113 |
| <i>Biological Process</i> | GO:0031424 keratinization                    | 7  | 2.22  | <i>HRNR, KRT17, SPRR1A, SPRR1B, SPRR3, SFN, ABCA12</i>                                                                                                                                                                                                                                                                                                                                                                                                                                                                                                                                                                                                               | 8.78  | 1.34E-04 | 1.356763887 |
| <i>Cellular Component</i> | GO:0005615 extracellular space               | 54 | 17.09 | <i>NRP1, IGFBP6, VTN, ANPEP, KRT81, SPX, PAPP, HMOX1, CEACAM6, NRG1, STC2, CST1, IL6R, STOM, CTSL, THBD, ADM, CST6, IL36B, SLPI, STC1, LAMC2, LRRK2, ALDOA, BPIFB1, CXCL5, C3, CLU, CD109, SFN, ALDH3A1, FGG, FGA, FGB, TFF2, ENO2, FN1, SPP1, ANGPTL4, ILIRN, ANXA1, AXL, DPYSL3, IL36RN, DKK1, APOL1, AKR1B1, ANXA13, CP, IGFBP1, AGR2, IGFBP3, MUC5B, MUC16</i>                                                                                                                                                                                                                                                                                                   | 2.52  | 5.81E-10 | 6.736047768 |
| <i>Cellular Component</i> | GO:0070062 extracellular exosome             | 81 | 25.63 | <i>LDHA, HRNR, IGFBP6, UCHL1, VTN, ANPEP, SDCBP2, CLCF1, SLC2A3, PLOD2, CEACAM5, SLC4A4, RHOF, DPP4, AKR1C1, TUBB3, FUT11, PTPRS, BASP1, SIRPA, NEBL, STOM, CTSL, CST6, KRT17, SPRR3, SLPI, CNTN1, LRRK2, ALDOA, FXYD2, RAB3B, BPIFB1, FUT8, EPDR1, C3, POC1B-GALNT4, ALDOC, VIM, CLU, SFN, CDH6, ALCAM, FGG, FGA, FGB, TFF2, GALC, ENO2, COL6A1, FAM162A, NDRG1, FGLI, EHD2, FN1, SPP1, ST6GAL1, CPPED1, ILIRN, FSCN1, AXL, ANXA1, AK4, MID2, THSD7A, MGST3, GBE1, LAMA3, SPRR1B, RAB34, AKR1B1, THSD4, ANXA13, FCGBP, ZNF114, CP, ANTXR1, PGK1, IGFBP3, MUC5B, MUC16</i>                                                                                           | 1.81  | 5.84E-08 | 5.035072263 |
| <i>Cellular Component</i> | GO:0005577 fibrinogen complex                | 5  | 1.58  | <i>FGG, FGA, FGB, FGLI, FN1</i>                                                                                                                                                                                                                                                                                                                                                                                                                                                                                                                                                                                                                                      | 34.91 | 7.33E-06 | 3.112441292 |
| <i>Cellular Component</i> | GO:0005886 plasma membrane                   | 96 | 30.38 | <i>NRP2, SYT1, TUSC3, NRP1, GABRB3, OSMR, UCHL1, CDCP1, NBEA, SDCBP2, NRCAM, ATP2B4, GAB2, SLC2A3, SLC23A2, HMOX1, CNTNAP3, RAET1L, CEACAM6, UNC5C, RHOD, SLC4A4, RHOF, DPP4, PAG1, CA12, PCDH9, PTPRS, SPIRE1, BASP1, PTPRU, IL6R, NTSR1, SIRPA, DAPK1, GRB10, THBD, CA9, TNFRSF10D, CNTN1, LRRK2, ARL4C, FXYD2, CAV2, FGFRI, CAV1, RAB3B, C3, CALD1, VIM, AKAP12, CD109, BDKRB2, APLP1, ALDH3A1, CDH6, SLC11A2, FGG, PLIN2, FGA, SLC29A4, FGB, GPM1, ENO2, AHNAK2, RHOBTB1, LGSN, NDRG1, EHD2, CDC42EP3, FAM127A, ABCA12, RNF144A, CPPED1, ILIRN, MAP1B, ADGRG6, AXL, ANXA1, CNNM1, THSD7A, SLC16A3, LAT, DKK1, CDH17, ITGA5, SVIL, ANXA13, TM4SF20, KIAA0319,</i> | 1.46  | 3.63E-05 | 2.543396236 |

|                           |                                            |    |       |                                                                                                                                                                                                                                                                                                                      |      |             |             |
|---------------------------|--------------------------------------------|----|-------|----------------------------------------------------------------------------------------------------------------------------------------------------------------------------------------------------------------------------------------------------------------------------------------------------------------------|------|-------------|-------------|
|                           |                                            |    |       | <i>ANTXR1, ABCC2, BMPR1B, PHLDB2, MUC16, VLDLR</i>                                                                                                                                                                                                                                                                   |      |             |             |
| <i>Cellular Component</i> | GO:0048471 perinuclear region of cytoplasm | 25 | 7.91  | <i>CAV2, HRNR, CAV1, RAB3B, PTPRM, STC2, POC1B-GALNT4, CLU, IGF2BP1, SPIRE1, MTIX, APLP1, STOM, SLC11A2, BDNF, EML1, HMOX1, RAB34, MT2A, AKR1B1, MT1E, LAMC2, NDRG1, EHD2, SPP1</i>                                                                                                                                  | 2.53 | 5.75E-05    | 2.440179073 |
| <i>Cellular Component</i> | GO:0016324 apical plasma membrane          | 16 | 5.06  | <i>CAV1, OSMR, MPDZ, ANXA1, IL6R, AMOTL1, SLC11A2, SLC29A4, SLC23A2, ANXA13, STC1, ABCC2, NRG1, DPP4, FNI, KCNE4</i>                                                                                                                                                                                                 | 3.46 | 6.74E-05    | 2.45051893  |
| <i>Cellular Component</i> | GO:0005576 extracellular region            | 46 | 14.56 | <i>ALDOA, NRP2, FGFR1, BPIFB1, NXPH4, EPDR1, CXCL5, C3, CLU, IGFBP6, VTN, CDCP1, NRCAM, BDNF, FGG, PLIN2, FGA, CLCF1, PAPP, FGB, RSPO3, CNTNAP3, CDA, COL6A1, NRG1, SPP1, ANGPTL4, FNI, HHIPL2, STC2, ANXA1, IL6R, COL5A2, COL4A6, COL4A5, CTSN, DKK1, LAMA3, APOL1, ADM, IL36B, LAMC2, CP, IGFBP1, CHGB, IGFBP3</i> | 1.80 | 1.30E-04    | 2.23226548  |
| <i>Cellular Component</i> | GO:0072562 blood microparticle             | 11 | 3.48  | <i>STOM, FGG, APOL1, FGA, FGB, C3, CLU, VTN, CP, FNI, ANGPTL4</i>                                                                                                                                                                                                                                                    | 4.55 | 1.59E-04    | 2.202025537 |
| <i>Cellular Component</i> | GO:0016323 basolateral plasma membrane     | 11 | 3.48  | <i>FXRD2, CAV1, ATP2B4, CA9, CDH17, SLC23A2, ANXA1, ANXA13, CEACAM5, IL6R, SLC4A4</i>                                                                                                                                                                                                                                | 3.84 | 6.16E-04    | 1.669578624 |
| <i>Cellular Component</i> | GO:0001533 cornified envelope              | 6  | 1.90  | <i>HRNR, CST6, SPRR1A, SPRR1B, ANXA1, SPRR3</i>                                                                                                                                                                                                                                                                      | 8.20 | 7.80E-04    | 1.613333839 |
| <i>Cellular Component</i> | GO:0009986 cell surface                    | 20 | 6.33  | <i>PPFIA4, NRP1, CLU, ANXA1, CD109, AXL, IL6R, NTSR1, SLC11A2, FGG, THBD, TNS1, FGA, FGB, ITGA5, CDH17, ABCC2, ANXR1, LRP4, DPP4</i>                                                                                                                                                                                 | 2.32 | 0.001100515 | 1.506721294 |
| <i>Cellular Component</i> | GO:0045121 membrane raft                   | 11 | 3.48  | <i>STOM, LAT, CAV2, CAV1, PTRF, CNTN1, ANXA13, NTSR1, PGK1, PAG1, DPP4</i>                                                                                                                                                                                                                                           | 3.36 | 0.00171468  | 1.35471486  |
| <i>Cellular Component</i> | GO:0031093 platelet alpha granule lumen    | 6  | 1.90  | <i>ALDOA, FGG, FGA, FGB, CLU, FNI</i>                                                                                                                                                                                                                                                                                | 6.86 | 0.001763319 | 1.376824471 |
| <i>Molecular Function</i> | GO:0005102 receptor binding                | 19 | 6.01  | <i>CAV1, NXPH4, C3, IGFBP6, ANXA1, CAPRN2, ALCAM, FGG, LAMA3, FGA, ADM, FGB, CLCF1, RSPO3, IGFBP1, NRG1, ABL2, DPP4, ABCA12</i>                                                                                                                                                                                      | 3.29 | 2.07E-05    | 1.96033577  |
| <i>Molecular Function</i> | GO:0030674 protein binding, bridging       | 9  | 2.85  | <i>CAV2, CAV1, FGG, FGA, SPRR1A, FGB, SPRR1B, FSCN1, ANXA1</i>                                                                                                                                                                                                                                                       | 7.15 | 3.57E-05    | 2.024221751 |
| <i>KEGG pathway</i>       | hsa04512 ECM-receptor interaction          | 10 | 3.16  | <i>LAMA3, ITGA5, COL6A1, LAMC2, VTN, COL5A2, COL4A6, SPP1, COL4A5, FNI</i>                                                                                                                                                                                                                                           | 5.69 | 5.52E-05    | 1.986378305 |

<sup>1</sup> Differentially expressed upregulated and downregulated human transcripts between infected and uninfected Ground cultures were analyzed using DAVID 6.8 using a threshold count of 2, an EASE score of 0.05 and Benjamini-Hochberg correction (< 0.05)

**Supplementary Table 8. Differentially expressed host genes in infected Flight vs infected Ground cultures <sup>1,2</sup>**

| Gene                           | Description                                                      | Fold Change | FDR         |
|--------------------------------|------------------------------------------------------------------|-------------|-------------|
| <b>Upregulated genes (266)</b> |                                                                  |             |             |
| <i>FAM25A</i>                  | family with sequence similarity 25 member A                      | 349.858     | 4.73E-16    |
| <i>LOC103344931</i>            | uncharacterized LOC103344931                                     | 174.972     | 1.86E-06    |
| <i>TFF2</i>                    | trefoil factor 2                                                 | 165.359     | 3.20E-06    |
| <i>CST6</i>                    | cystatin E/M                                                     | 111.743     | 6.78E-05    |
| <i>HSPB8</i>                   | heat shock protein family B (small) member 8                     | 95.264      | 0.000275112 |
| <i>FKBP1A-SDCBP2</i>           | FKBP1A-SDCBP2 readthrough (NMD candidate)                        | 93.738      | 0.016978697 |
| <i>IL36B</i>                   | interleukin 36, beta                                             | 91.330      | 0.000328636 |
| <i>SPRR1B</i>                  | small proline rich protein 1B                                    | 90.507      | 4.98E-60    |
| <i>LOC283045</i>               | uncharacterized LOC283045                                        | 87.262      | 0.000752781 |
| <i>IFNL1</i>                   | interferon lambda 1                                              | 87.059      | 0.000774627 |
| <i>TGIF2-C20orf24</i>          | TGIF2-C20orf24 readthrough                                       | 83.971      | 0.014763594 |
| <i>SPRR1A</i>                  | small proline rich protein 1A                                    | 82.378      | 3.44E-26    |
| <i>EEF1E1-BLOC1S5</i>          | EEF1E1-BLOC1S5 readthrough (NMD candidate)                       | 78.034      | 0.006423799 |
| <i>CNTN1</i>                   | contactin 1                                                      | 58.459      | 0.00135517  |
| <i>LOC105373098</i>            | uncharacterized LOC105373098                                     | 54.519      | 0.042969066 |
| <i>HSPE1-MOB4</i>              | HSPE1-MOB4 readthrough                                           | 46.503      | 0.049391085 |
| <i>DENND2C</i>                 | DENN domain containing 2C                                        | 46.204      | 0.020233506 |
| <i>LHX4-AS1</i>                | LHX4 antisense RNA 1                                             | 40.102      | 0.019069817 |
| <i>SPRR3</i>                   | small proline rich protein 3                                     | 39.831      | 9.36E-38    |
| <i>CSF2</i>                    | colony stimulating factor 2                                      | 33.856      | 4.08E-05    |
| <i>SGK3</i>                    | serum/glucocorticoid regulated kinase family member 3            | 26.708      | 0.013019581 |
| <i>ZNF365</i>                  | zinc finger protein 365                                          | 23.966      | 7.32E-06    |
| <i>IFNB1</i>                   | interferon beta 1                                                | 23.921      | 0.000704738 |
| <i>LIPK</i>                    | lipase family member K                                           | 20.760      | 1.96E-05    |
| <i>IGFN1</i>                   | immunoglobulin-like and fibronectin type III domain containing 1 | 20.284      | 0.002406174 |
| <i>KIAA0319</i>                | KIAA0319                                                         | 16.959      | 6.36E-09    |
| <i>PHOSPHO2-KLHL23</i>         | PHOSPHO2-KLHL23 readthrough                                      | 14.719      | 0.000662791 |
| <i>LINC00520</i>               | long intergenic non-protein coding RNA 520                       | 14.147      | 0.023038258 |
| <i>IVL</i>                     | involucrin                                                       | 14.120      | 0.028183866 |
| <i>CST1</i>                    | cystatin SN                                                      | 14.084      | 3.61E-33    |
| <i>CAV2</i>                    | caveolin 2                                                       | 13.904      | 1.44E-06    |
| <i>CTNNA2</i>                  | catenin alpha 2                                                  | 13.889      | 0.000915727 |
| <i>RAET1L</i>                  | retinoic acid early transcript 1L                                | 13.570      | 0.000922228 |
| <i>CST4</i>                    | cystatin S                                                       | 13.348      | 0.034275804 |
| <i>IL36RN</i>                  | interleukin 36 receptor antagonist                               | 12.809      | 0.001101779 |
| <i>NCF2</i>                    | neutrophil cytosolic factor 2                                    | 12.717      | 8.83E-09    |
| <i>GPSM1</i>                   | G-protein signaling modulator 1                                  | 12.571      | 0.000883479 |
| <i>CLU</i>                     | clusterin                                                        | 12.008      | 0.007434587 |
| <i>LOC105378179</i>            | uncharacterized LOC105378179                                     | 11.573      | 1.25E-30    |
| <i>LOC105376517</i>            | uncharacterized LOC105376517                                     | 11.557      | 0.011312967 |
| <i>MYH15</i>                   | myosin heavy chain 15                                            | 11.045      | 0.00503416  |
| <i>MAOB</i>                    | monoamine oxidase B                                              | 10.502      | 0.002963514 |
| <i>AHNAK2</i>                  | AHNAK nucleoprotein 2                                            | 10.412      | 3.44E-28    |
| <i>COL6A1</i>                  | collagen type VI alpha 1 chain                                   | 9.924       | 4.26E-06    |
| <i>DHRS9</i>                   | dehydrogenase/reductase 9                                        | 9.854       | 6.38E-21    |
| <i>SPTSSB</i>                  | serine palmitoyltransferase small subunit B                      | 9.756       | 4.12E-11    |
| <i>KIAA1462</i>                | KIAA1462                                                         | 9.681       | 2.18E-20    |
| <i>KRT17</i>                   | keratin 17                                                       | 9.345       | 2.55E-07    |
| <i>NAV3</i>                    | neuron navigator 3                                               | 9.326       | 0.037751375 |
| <i>ANGPTL4</i>                 | angiopoietin like 4                                              | 8.868       | 2.45E-06    |
| <i>LINC00941</i>               | long intergenic non-protein coding RNA 941                       | 8.554       | 0.003695165 |
| <i>GDPD3</i>                   | glycerophosphodiester phosphodiesterase domain containing 3      | 8.283       | 0.024416238 |
| <i>LOC102723480</i>            | uncharacterized LOC102723480                                     | 8.053       | 0.031117076 |
| <i>ANKRD29</i>                 | ankyrin repeat domain 29                                         | 8.048       | 0.034882773 |
| <i>TMEM255B</i>                | transmembrane protein 255B                                       | 7.863       | 0.020426879 |
| <i>ARL4C</i>                   | ADP ribosylation factor like GTPase 4C                           | 7.489       | 4.50E-06    |
| <i>UCA1</i>                    | urothelial cancer associated 1 (non-protein coding)              | 7.372       | 1.41E-21    |
| <i>IL1RN</i>                   | interleukin 1 receptor antagonist                                | 7.002       | 1.27E-18    |



|                     |                                                                 |       |             |
|---------------------|-----------------------------------------------------------------|-------|-------------|
| <i>NOV</i>          | nephroblastoma overexpressed                                    | 6.924 | 0.035766746 |
| <i>CDRT1</i>        | CMT1A duplicated region transcript 1                            | 6.649 | 0.016827859 |
| <i>GALNT5</i>       | polypeptide N-acetylgalactosaminyltransferase 5                 | 6.309 | 0.001648066 |
| <i>ZNF114</i>       | zinc finger protein 114                                         | 6.302 | 0.001731296 |
| <i>HDAC9</i>        | histone deacetylase 9                                           | 6.301 | 0.000357609 |
| <i>LOC105374003</i> | uncharacterized LOC105374003                                    | 6.241 | 0.006659696 |
| <i>SCEL</i>         | sciellin                                                        | 5.931 | 0.001828161 |
| <i>IGFL2</i>        | IGF like family member 2                                        | 5.931 | 0.003961994 |
| <i>IL6R</i>         | interleukin 6 receptor                                          | 5.907 | 1.07E-05    |
| <i>FAM173A</i>      | family with sequence similarity 173 member A                    | 5.741 | 0.02035755  |
| <i>HBEGF</i>        | heparin binding EGF like growth factor                          | 5.697 | 2.68E-08    |
| <i>PTRF</i>         | polymerase I and transcript release factor                      | 5.686 | 6.98E-18    |
| <i>IL32</i>         | interleukin 32                                                  | 5.616 | 0.02786076  |
| <i>FOSL1</i>        | FOS like 1, AP-1 transcription factor subunit                   | 5.532 | 1.04E-15    |
| <i>GJB3</i>         | gap junction protein beta 3                                     | 5.489 | 1.60E-13    |
| <i>AKAP12</i>       | A-kinase anchoring protein 12                                   | 5.406 | 0.000157836 |
| <i>SEMA7A</i>       | semaphorin 7A (John Milton Hagen blood group)                   | 5.381 | 0.034775622 |
| <i>IFIT2</i>        | interferon induced protein with tetratricopeptide repeats 2     | 5.236 | 8.21E-16    |
| <i>LOC107987206</i> | uncharacterized LOC107987206                                    | 5.121 | 6.07E-16    |
| <i>OASL</i>         | 2'-5'-oligoadenylate synthetase like                            | 4.896 | 6.66E-14    |
| <i>NTSR1</i>        | neurotensin receptor 1                                          | 4.872 | 7.55E-15    |
| <i>MSX2</i>         | msh homeobox 2                                                  | 4.775 | 0.035687819 |
| <i>RSAD2</i>        | radical S-adenosyl methionine domain containing 2               | 4.771 | 7.03E-10    |
| <i>TUBB3</i>        | tubulin beta 3 class III                                        | 4.746 | 0.003044697 |
| <i>ATP2B4</i>       | ATPase plasma membrane Ca <sup>2+</sup> transporting 4          | 4.653 | 5.82E-14    |
| <i>CDA</i>          | cytidine deaminase                                              | 4.556 | 3.97E-11    |
| <i>HLA-B</i>        | major histocompatibility complex, class I, B                    | 4.517 | 0.011509289 |
| <i>CLCF1</i>        | cardiotrophin-like cytokine factor 1                            | 4.481 | 1.24E-12    |
| <i>NLR5</i>         | NLR family CARD domain containing 5                             | 4.464 | 1.14E-06    |
| <i>SPINK1</i>       | serine peptidase inhibitor, Kazal type 1                        | 4.439 | 0.023427591 |
| <i>NDUFA4L2</i>     | NDUFA4, mitochondrial complex associated like 2                 | 4.406 | 0.000974367 |
| <i>LAMC2</i>        | laminin subunit gamma 2                                         | 4.402 | 9.60E-13    |
| <i>AKR1C1</i>       | aldo-keto reductase family 1 member C1                          | 4.319 | 2.09E-11    |
| <i>PMAIP1</i>       | phorbol-12-myristate-13-acetate-induced protein 1               | 4.086 | 4.23E-05    |
| <i>DPP4</i>         | dipeptidyl peptidase 4                                          | 4.067 | 4.23E-10    |
| <i>ACOT7</i>        | acyl-CoA thioesterase 7                                         | 3.928 | 0.028748948 |
| <i>HLA-B</i>        | major histocompatibility complex, class I, B                    | 3.886 | 5.78E-05    |
| <i>SFN</i>          | stratifin                                                       | 3.848 | 2.17E-10    |
| <i>CEACAM6</i>      | carcinoembryonic antigen related cell adhesion molecule 6       | 3.836 | 2.29E-09    |
| <i>ADAM19</i>       | ADAM metallopeptidase domain 19                                 | 3.811 | 6.02E-05    |
| <i>FUT8</i>         | fucosyltransferase 8                                            | 3.805 | 0.049833584 |
| <i>LAMA3</i>        | laminin subunit alpha 3                                         | 3.790 | 8.90E-11    |
| <i>ELL2</i>         | elongation factor for RNA polymerase II 2                       | 3.606 | 1.57E-09    |
| <i>SPIRE1</i>       | spire type actin nucleation factor 1                            | 3.600 | 9.80E-08    |
| <i>LOC645553</i>    | uncharacterized LOC645553                                       | 3.599 | 2.80E-09    |
| <i>EREG</i>         | epiregulin                                                      | 3.567 | 4.31E-09    |
| <i>SERTAD1</i>      | SERTA domain containing 1                                       | 3.500 | 2.30E-08    |
| <i>DUSP10</i>       | dual specificity phosphatase 10                                 | 3.489 | 0.008112262 |
| <i>SECTM1</i>       | secreted and transmembrane 1                                    | 3.489 | 1.50E-09    |
| <i>MAP2</i>         | microtubule associated protein 2                                | 3.481 | 0.015967901 |
| <i>ANXA1</i>        | annexin A1                                                      | 3.472 | 9.67E-09    |
| <i>PTGS2</i>        | prostaglandin-endoperoxide synthase 2                           | 3.442 | 2.09E-09    |
| <i>CTSL</i>         | cathepsin L                                                     | 3.441 | 1.59E-08    |
| <i>KLF4</i>         | Kruppel like factor 4                                           | 3.399 | 0.000100998 |
| <i>RHOF</i>         | ras homolog family member F, filopodia associated               | 3.373 | 6.61E-09    |
| <i>PDLIM7</i>       | PDZ and LIM domain 7                                            | 3.357 | 2.49E-06    |
| <i>RHOD</i>         | ras homolog family member D                                     | 3.348 | 3.85E-07    |
| <i>NRP1</i>         | neuropilin 1                                                    | 3.329 | 0.000887425 |
| <i>ISG15</i>        | ISG15 ubiquitin-like modifier                                   | 3.296 | 1.29E-08    |
| <i>GLS</i>          | glutaminase                                                     | 3.255 | 5.99E-08    |
| <i>CDCP1</i>        | CUB domain containing protein 1                                 | 3.213 | 6.37E-08    |
| <i>LAT</i>          | linker for activation of T-cells                                | 3.197 | 0.00120829  |
| <i>MLLT11</i>       | myeloid/lymphoid or mixed-lineage leukemia; translocated to, 11 | 3.136 | 0.0109947   |
| <i>CXCL2</i>        | C-X-C motif chemokine ligand 2                                  | 3.108 | 7.23E-05    |
| <i>MID2</i>         | midline 2                                                       | 3.094 | 0.002403245 |
| <i>ATG4D</i>        | autophagy related 4D cysteine peptidase                         | 3.083 | 0.014317719 |

|                   |                                                             |       |             |
|-------------------|-------------------------------------------------------------|-------|-------------|
| <i>SLC25A30</i>   | solute carrier family 25 member 30                          | 3.032 | 0.002810537 |
| <i>PLIN2</i>      | perilipin 2                                                 | 3.024 | 1.58E-07    |
| <i>FLNA</i>       | filamin A                                                   | 2.928 | 3.14E-06    |
| <i>ISG20</i>      | interferon stimulated exonuclease gene 20                   | 2.920 | 3.46E-05    |
| <i>P4HA2</i>      | prolyl 4-hydroxylase subunit alpha 2                        | 2.887 | 1.20E-06    |
| <i>GPC1</i>       | glypican 1                                                  | 2.868 | 1.74E-06    |
| <i>NQO2</i>       | NAD(P)H quinone dehydrogenase 2                             | 2.837 | 0.00196878  |
| <i>CDKN1A</i>     | cyclin dependent kinase inhibitor 1A                        | 2.834 | 1.72E-06    |
| <i>CHAC1</i>      | ChaC glutathione specific gamma-glutamylcyclotransferase 1  | 2.819 | 0.009631218 |
| <i>SRXN1</i>      | sulfiredoxin 1                                              | 2.756 | 7.17E-06    |
| <i>IDS</i>        | iduronate 2-sulfatase                                       | 2.749 | 9.90E-06    |
| <i>SDCBP2</i>     | syndecan binding protein 2                                  | 2.746 | 3.36E-06    |
| <i>ZSCAN12P1</i>  | zinc finger and SCAN domain containing 12 pseudogene 1      | 2.745 | 0.000745457 |
| <i>SQRDL</i>      | sulfide quinone reductase-like (yeast)                      | 2.742 | 0.020259647 |
| <i>MFGE8</i>      | milk fat globule-EGF factor 8 protein                       | 2.736 | 0.000208377 |
| <i>TXN</i>        | thioredoxin                                                 | 2.726 | 1.60E-05    |
| <i>ZNF185</i>     | zinc finger protein 185 (LIM domain)                        | 2.707 | 4.99E-06    |
| <i>WFDC2</i>      | WAP four-disulfide core domain 2                            | 2.678 | 1.40E-05    |
| <i>PLP2</i>       | proteolipid protein 2                                       | 2.665 | 1.33E-05    |
| <i>PI3</i>        | peptidase inhibitor 3                                       | 2.659 | 2.40E-06    |
| <i>PINK1</i>      | PTEN induced putative kinase 1                              | 2.648 | 6.39E-06    |
| <i>TIMP1</i>      | TIMP metalloproteinase inhibitor 1                          | 2.641 | 1.02E-05    |
| <i>CXCL8</i>      | C-X-C motif chemokine ligand 8                              | 2.628 | 1.33E-05    |
| <i>CDC42EP3</i>   | CDC42 effector protein 3                                    | 2.627 | 7.43E-05    |
| <i>CAPN2</i>      | calpain 2                                                   | 2.614 | 2.75E-05    |
| <i>SLC39A13</i>   | solute carrier family 39 member 13                          | 2.611 | 0.006480976 |
| <i>KLF10</i>      | Kruppel like factor 10                                      | 2.609 | 9.66E-06    |
| <i>SPTSSA</i>     | serine palmitoyltransferase small subunit A                 | 2.600 | 0.001035961 |
| <i>TREML2</i>     | triggering receptor expressed on myeloid cells like 2       | 2.592 | 0.000350856 |
| <i>TNFRSF12A</i>  | TNF receptor superfamily member 12A                         | 2.589 | 1.33E-05    |
| <i>SULT2B1</i>    | sulfotransferase family 2B member 1                         | 2.573 | 1.42E-05    |
| <i>PLAUR</i>      | plasminogen activator, urokinase receptor                   | 2.567 | 1.68E-05    |
| <i>CEACAM5</i>    | carcinoembryonic antigen related cell adhesion molecule 5   | 2.550 | 2.86E-05    |
| <i>LRP8</i>       | LDL receptor related protein 8                              | 2.519 | 7.67E-05    |
| <i>IMPA2</i>      | inositol monophosphatase 2                                  | 2.516 | 7.88E-05    |
| <i>CAPRN2</i>     | caprin family member 2                                      | 2.512 | 6.96E-05    |
| <i>IGFBP6</i>     | insulin like growth factor binding protein 6                | 2.509 | 0.000228406 |
| <i>LOXL4</i>      | lysyl oxidase like 4                                        | 2.495 | 4.63E-05    |
| <i>ABL2</i>       | ABL proto-oncogene 2, non-receptor tyrosine kinase          | 2.475 | 5.94E-05    |
| <i>LURAP1L</i>    | leucine rich adaptor protein 1 like                         | 2.475 | 9.28E-05    |
| <i>IFIT3</i>      | interferon induced protein with tetratricopeptide repeats 3 | 2.473 | 5.40E-05    |
| <i>GLRX</i>       | glutaredoxin                                                | 2.470 | 0.000658385 |
| <i>EGR1</i>       | early growth response 1                                     | 2.467 | 0.000166425 |
| <i>CYP4F11</i>    | cytochrome P450 family 4 subfamily F member 11              | 2.464 | 0.001320621 |
| <i>CCAT1</i>      | colon cancer associated transcript 1 (non-protein coding)   | 2.435 | 7.73E-05    |
| <i>ANKRD22</i>    | ankyrin repeat domain 22                                    | 2.432 | 0.001845486 |
| <i>LAMB3</i>      | laminin subunit beta 3                                      | 2.430 | 0.00025236  |
| <i>SH3KBP1</i>    | SH3 domain containing kinase binding protein 1              | 2.430 | 0.000107567 |
| <i>PPAD</i>       | peroxisome proliferator activated receptor delta            | 2.417 | 0.000100998 |
| <i>ALCAM</i>      | activated leukocyte cell adhesion molecule                  | 2.414 | 0.002649636 |
| <i>STBD1</i>      | starch binding domain 1                                     | 2.411 | 0.023918262 |
| <i>ST6GALNAC4</i> | ST6 N-acetylgalactosaminide alpha-2,6-sialyltransferase 4   | 2.410 | 0.000822164 |
| <i>MOB3C</i>      | MOB kinase activator 3C                                     | 2.408 | 6.87E-05    |
| <i>HLA-A</i>      | major histocompatibility complex, class I, A                | 2.404 | 0.000936675 |
| <i>TXNRD1</i>     | thioredoxin reductase 1                                     | 2.403 | 0.000444854 |
| <i>VLDLR</i>      | very low density lipoprotein receptor                       | 2.398 | 0.006318591 |
| <i>COTL1</i>      | coactosin like F-actin binding protein 1                    | 2.398 | 0.000103682 |
| <i>FADS3</i>      | fatty acid desaturase 3                                     | 2.391 | 0.003044697 |
| <i>MAP1A</i>      | microtubule associated protein 1A                           | 2.389 | 0.000148154 |
| <i>MXD1</i>       | MAX dimerization protein 1                                  | 2.388 | 0.000130541 |
| <i>TMEM265</i>    | transmembrane protein 265                                   | 2.384 | 0.003856795 |
| <i>SH3TC2</i>     | SH3 domain and tetratricopeptide repeats 2                  | 2.382 | 0.000134804 |
| <i>ARNTL2</i>     | aryl hydrocarbon receptor nuclear translocator like 2       | 2.361 | 0.00019065  |
| <i>CPTP</i>       | ceramide-1-phosphate transfer protein                       | 2.350 | 0.005972415 |
| <i>MYEOV</i>      | myeloma overexpressed                                       | 2.342 | 0.000280113 |
| <i>IFIT1</i>      | interferon induced protein with tetratricopeptide repeats 1 | 2.337 | 0.000192761 |

|                 |                                                            |       |             |
|-----------------|------------------------------------------------------------|-------|-------------|
| <i>C6orf223</i> | chromosome 6 open reading frame 223                        | 2.336 | 0.001106511 |
| <i>RHOB</i>     | ras homolog family member B                                | 2.330 | 0.000223022 |
| <i>SLC27A4</i>  | solute carrier family 27 member 4                          | 2.328 | 0.002868922 |
| <i>PDGFB</i>    | platelet derived growth factor subunit B                   | 2.323 | 0.030133813 |
| <i>PDLIM5</i>   | PDZ and LIM domain 5                                       | 2.312 | 0.000627161 |
| <i>HLA-A</i>    | major histocompatibility complex, class I, A               | 2.303 | 0.000261901 |
| <i>C6orf1</i>   | chromosome 6 open reading frame 1                          | 2.300 | 0.035598022 |
| <i>AP5Z1</i>    | adaptor related protein complex 5 zeta 1 subunit           | 2.281 | 0.006318591 |
| <i>RNF24</i>    | ring finger protein 24                                     | 2.275 | 0.00042326  |
| <i>MICALL1</i>  | MICAL like 1                                               | 2.275 | 0.000322409 |
| <i>ECM1</i>     | extracellular matrix protein 1                             | 2.264 | 0.021792663 |
| <i>AKT1S1</i>   | AKT1 substrate 1                                           | 2.262 | 0.000658385 |
| <i>BSPRY</i>    | B-box and SPRY domain containing                           | 2.250 | 0.013831217 |
| <i>PPIF</i>     | peptidylprolyl isomerase F                                 | 2.239 | 0.000579804 |
| <i>NOSIP</i>    | nitric oxide synthase interacting protein                  | 2.236 | 0.017550578 |
| <i>SLCO4A1</i>  | solute carrier organic anion transporter family member 4A1 | 2.235 | 0.000627161 |
| <i>KRT80</i>    | keratin 80                                                 | 2.232 | 0.000616848 |
| <i>NXPE3</i>    | neurexophilin and PC-esterase domain family member 3       | 2.229 | 0.038725336 |
| <i>LPCAT2</i>   | lysophosphatidylcholine acyltransferase 2                  | 2.226 | 0.000793393 |
| <i>SNORA74A</i> | small nucleolar RNA, H/ACA box 74A                         | 2.220 | 0.000633005 |
| <i>GCLM</i>     | glutamate-cysteine ligase modifier subunit                 | 2.217 | 0.00110182  |
| <i>JUN</i>      | Jun proto-oncogene, AP-1 transcription factor subunit      | 2.216 | 0.000936675 |
| <i>ATF3</i>     | activating transcription factor 3                          | 2.208 | 0.003277282 |
| <i>ENO2</i>     | enolase 2                                                  | 2.206 | 0.004424572 |
| <i>C11orf24</i> | chromosome 11 open reading frame 24                        | 2.203 | 0.008004439 |
| <i>APRT</i>     | adenine phosphoribosyltransferase                          | 2.195 | 0.006692795 |
| <i>MAPK13</i>   | mitogen-activated protein kinase 13                        | 2.190 | 0.00148469  |
| <i>EPAS1</i>    | endothelial PAS domain protein 1                           | 2.186 | 0.001040986 |
| <i>NOCT</i>     | nocturnin                                                  | 2.185 | 0.034748331 |
| <i>MGST3</i>    | microsomal glutathione S-transferase 3                     | 2.183 | 0.010221763 |
| <i>SH3BGL3</i>  | SH3 domain binding glutamate rich protein like 3           | 2.180 | 0.002297154 |
| <i>TDP2</i>     | tyrosyl-DNA phosphodiesterase 2                            | 2.178 | 0.001060702 |
| <i>ABLIM3</i>   | actin binding LIM protein family member 3                  | 2.169 | 0.001174074 |
| <i>ARL2BP</i>   | ADP ribosylation factor like GTPase 2 binding protein      | 2.166 | 0.041670299 |
| <i>GPX3</i>     | glutathione peroxidase 3                                   | 2.158 | 0.001888852 |
| <i>SLC10A3</i>  | solute carrier family 10 member 3                          | 2.152 | 0.001731296 |
| <i>DHDDS</i>    | dehydrodolichyl diphosphate synthase subunit               | 2.144 | 0.001731296 |
| <i>CLTB</i>     | clathrin light chain B                                     | 2.138 | 0.038567446 |
| <i>OSGIN1</i>   | oxidative stress induced growth inhibitor 1                | 2.130 | 0.001731296 |
| <i>FTHIP16</i>  | ferritin heavy chain 1 pseudogene 16                       | 2.122 | 0.001610405 |
| <i>ACSL1</i>    | acyl-CoA synthetase long-chain family member 1             | 2.116 | 0.00258019  |
| <i>CD59</i>     | CD59 molecule                                              | 2.114 | 0.004446175 |
| <i>TPRA1</i>    | transmembrane protein adipocyte associated 1               | 2.112 | 0.00891168  |
| <i>NABP1</i>    | nucleic acid binding protein 1                             | 2.111 | 0.005544972 |
| <i>YRDC</i>     | yrdC N6-threonylcarbamoyltransferase domain containing     | 2.106 | 0.035880246 |
| <i>RABAC1</i>   | Rab acceptor 1                                             | 2.102 | 0.004525921 |
| <i>PKP3</i>     | plakophilin 3                                              | 2.101 | 0.002399367 |
| <i>IFITM10</i>  | interferon induced transmembrane protein 10                | 2.091 | 0.019575473 |
| <i>RHOG</i>     | ras homolog family member G                                | 2.089 | 0.004066989 |
| <i>MYZAP</i>    | myocardial zonula adherens protein                         | 2.084 | 0.005247721 |
| <i>ITPKC</i>    | inositol-trisphosphate 3-kinase C                          | 2.080 | 0.003193015 |
| <i>ITGA3</i>    | integrin subunit alpha 3                                   | 2.078 | 0.005972415 |
| <i>MALL</i>     | mal, T-cell differentiation protein like                   | 2.070 | 0.018578373 |
| <i>NCDN</i>     | neurochondrin                                              | 2.070 | 0.006525294 |
| <i>TOM1</i>     | target of myb1 membrane trafficking protein                | 2.062 | 0.020045806 |
| <i>TACSTD2</i>  | tumor-associated calcium signal transducer 2               | 2.050 | 0.007626992 |
| <i>PODXL</i>    | podocalyxin like                                           | 2.049 | 0.008473486 |
| <i>HLA-C</i>    | major histocompatibility complex, class I, C               | 2.048 | 0.005134135 |
| <i>KLC2</i>     | kinesin light chain 2                                      | 2.048 | 0.005090163 |
| <i>GLA</i>      | galactosidase alpha                                        | 2.046 | 0.036829644 |
| <i>S100A16</i>  | S100 calcium binding protein A16                           | 2.046 | 0.004110161 |
| <i>ODC1</i>     | ornithine decarboxylase 1                                  | 2.043 | 0.005972415 |
| <i>ADAM15</i>   | ADAM metalloproteinase domain 15                           | 2.042 | 0.003853852 |
| <i>CPEB2</i>    | cytoplasmic polyadenylation element binding protein 2      | 2.037 | 0.018164374 |
| <i>EZR</i>      | eZRin                                                      | 2.020 | 0.010078286 |
| <i>SRM</i>      | spermidine synthase                                        | 2.020 | 0.034533542 |

|                                  |                                                                       |        |             |
|----------------------------------|-----------------------------------------------------------------------|--------|-------------|
| <i>GNB5</i>                      | G protein subunit beta 5                                              | 2.020  | 0.010947358 |
| <i>DCBLD2</i>                    | discoidin, CUB and LCCL domain containing 2                           | 2.020  | 0.010947358 |
| <i>SRPRB</i>                     | SRP receptor beta subunit                                             | 2.018  | 0.005134135 |
| <i>KLHL21</i>                    | kelch like family member 21                                           | 2.018  | 0.005431255 |
| <i>PRSS3</i>                     | protease, serine 3                                                    | 2.016  | 0.008004439 |
| <i>KCNAB2</i>                    | potassium voltage-gated channel subfamily A regulatory beta subunit 2 | 2.012  | 0.016885691 |
| <i>ASNS</i>                      | asparagine synthetase (glutamine-hydrolyzing)                         | 2.011  | 0.005134135 |
| <i>SEC61G</i>                    | Sec61 translocon gamma subunit                                        | 2.011  | 0.009844088 |
| <i>RAB4B</i>                     | RAB4B, member RAS oncogene family                                     | 2.003  | 0.038567446 |
| <i>RN7SLAP</i>                   | RNA, 7SL, cytoplasmic 4, pseudogene                                   | 2.002  | 0.013952378 |
| <b>Downregulated genes (269)</b> |                                                                       |        |             |
| <i>COX2</i>                      | cytochrome c oxidase subunit II                                       | -2.002 | 0.01040103  |
| <i>BRWD3</i>                     | bromodomain and WD repeat domain containing 3                         | -2.007 | 0.00503416  |
| <i>MAGED2</i>                    | MAGE family member D2                                                 | -2.010 | 0.011177354 |
| <i>FRY</i>                       | FRY microtubule binding protein                                       | -2.018 | 0.009342067 |
| <i>TNS1</i>                      | tensin 1                                                              | -2.022 | 0.02452076  |
| <i>SERPINB1</i>                  | serpin family B member 1                                              | -2.023 | 0.004815504 |
| <i>ANO9</i>                      | anoctamin 9                                                           | -2.026 | 0.008193695 |
| <i>ZBTB37</i>                    | zinc finger and BTB domain containing 37                              | -2.038 | 0.020218872 |
| <i>MARCKSL1</i>                  | MARCKS like 1                                                         | -2.038 | 0.00626795  |
| <i>DPY19L4</i>                   | dpy-19 like 4 ( <i>C. elegans</i> )                                   | -2.043 | 0.021298522 |
| <i>ARHGAP26</i>                  | Rho GTPase activating protein 26                                      | -2.049 | 0.003715828 |
| <i>NFIA</i>                      | nuclear factor I A                                                    | -2.054 | 0.003235242 |
| <i>SBSPON</i>                    | somatomedin B and thrombospondin type 1 domain containing             | -2.057 | 0.003596785 |
| <i>SCARNA9</i>                   | small Cajal body-specific RNA 9                                       | -2.057 | 0.002868922 |
| <i>DIAPH2</i>                    | diaphanous related formin 2                                           | -2.060 | 0.003320834 |
| <i>KLHDC7A</i>                   | kelch domain containing 7A                                            | -2.061 | 0.01345768  |
| <i>STK39</i>                     | serine/threonine kinase 39                                            | -2.062 | 0.003060387 |
| <i>ZNF827</i>                    | zinc finger protein 827                                               | -2.067 | 0.002312942 |
| <i>CPNE2</i>                     | copine 2                                                              | -2.068 | 0.012142378 |
| <i>GALM</i>                      | galactose mutarotase                                                  | -2.073 | 0.037042785 |
| <i>MTRNR2L8</i>                  | MT-RNR2-like 8                                                        | -2.073 | 0.007784735 |
| <i>SLC1A1</i>                    | solute carrier family 1 member 1                                      | -2.081 | 0.002257088 |
| <i>FAM13A</i>                    | family with sequence similarity 13 member A                           | -2.084 | 0.043492603 |
| <i>ETS2</i>                      | ETS proto-oncogene 2, transcription factor                            | -2.087 | 0.004424572 |
| <i>LOC107986981</i>              | uncharacterized LOC107986981                                          | -2.091 | 0.023073852 |
| <i>C4orf19</i>                   | chromosome 4 open reading frame 19                                    | -2.092 | 0.001859692 |
| <i>VPS13A</i>                    | vacuolar protein sorting 13 homolog A                                 | -2.096 | 0.003101956 |
| <i>LOC101060400</i>              | uncharacterized LOC101060400                                          | -2.100 | 0.005609339 |
| <i>TRERF1</i>                    | transcriptional regulating factor 1                                   | -2.100 | 0.030259937 |
| <i>TBC1D1</i>                    | TBC1 domain family member 1                                           | -2.105 | 0.00503416  |
| <i>LOC105379752</i>              | putative uncharacterized protein FLJ46204                             | -2.108 | 0.003044697 |
| <i>MAML2</i>                     | mastermind like transcriptional coactivator 2                         | -2.111 | 0.019291377 |
| <i>CORO2A</i>                    | coronin 2A                                                            | -2.112 | 0.001731296 |
| <i>TCF12</i>                     | transcription factor 12                                               | -2.115 | 0.002326437 |
| <i>BCKDHB</i>                    | branched chain keto acid dehydrogenase E1 subunit beta                | -2.118 | 0.001973714 |
| <i>EMP2</i>                      | epithelial membrane protein 2                                         | -2.124 | 0.00135517  |
| <i>FAXDC2</i>                    | fatty acid hydroxylase domain containing 2                            | -2.128 | 0.008283405 |
| <i>RNLS</i>                      | renalase, FAD dependent amine oxidase                                 | -2.131 | 0.038396803 |
| <i>TARBP1</i>                    | TAR (HIV-1) RNA binding protein 1                                     | -2.133 | 0.001397187 |
| <i>ALDH7A1</i>                   | aldehyde dehydrogenase 7 family member A1                             | -2.134 | 0.026871016 |
| <i>COX1</i>                      | cytochrome c oxidase subunit I                                        | -2.134 | 0.001329926 |
| <i>MMS22L</i>                    | MMS22 like, DNA repair protein                                        | -2.139 | 0.022235807 |
| <i>PLA2G4A</i>                   | phospholipase A2 group IVA                                            | -2.143 | 0.030244159 |
| <i>TMEM168</i>                   | transmembrane protein 168                                             | -2.143 | 0.003546792 |
| <i>ABCG2</i>                     | ATP binding cassette subfamily G member 2 (Junior blood group)        | -2.144 | 0.001040986 |
| <i>ARID5B</i>                    | AT-rich interaction domain 5B                                         | -2.147 | 0.001354768 |
| <i>MCAM</i>                      | melanoma cell adhesion molecule                                       | -2.156 | 0.007784735 |
| <i>CCSER1</i>                    | coiled-coil serine rich protein 1                                     | -2.172 | 0.000992228 |
| <i>ATP6V1B1</i>                  | ATPase H <sup>+</sup> transporting V1 subunit B1                      | -2.173 | 0.034093819 |
| <i>UGT1A8</i>                    | UDP glucuronosyltransferase family 1 member A8                        | -2.178 | 0.000799691 |
| <i>ATP10B</i>                    | ATPase phospholipid transporting 10B (putative)                       | -2.179 | 0.001224466 |
| <i>ZNF888</i>                    | zinc finger protein 888                                               | -2.179 | 0.000832337 |
| <i>CRYZ</i>                      | crystallin zeta                                                       | -2.180 | 0.004330053 |
| <i>PRELID2</i>                   | PRELI domain containing 2                                             | -2.182 | 0.003585386 |
| <i>SCAPER</i>                    | S-phase cyclin A associated protein in the ER                         | -2.189 | 0.005741624 |

|                 |                                                                      |        |             |
|-----------------|----------------------------------------------------------------------|--------|-------------|
| <i>MAG11</i>    | membrane associated guanylate kinase, WW and PDZ domain containing 1 | -2.191 | 0.005972415 |
| <i>TP53I11</i>  | tumor protein p53 inducible protein 11                               | -2.200 | 0.004856119 |
| <i>ND6</i>      | NADH dehydrogenase, subunit 6 (complex I)                            | -2.202 | 0.002608104 |
| <i>ZNF552</i>   | zinc finger protein 552                                              | -2.205 | 0.002248026 |
| <i>GEN1</i>     | GEN1, Holliday junction 5' flap endonuclease                         | -2.211 | 0.015061117 |
| <i>LY75</i>     | lymphocyte antigen 75                                                | -2.214 | 0.00051051  |
| <i>CABLES1</i>  | Cdk5 and Abl enzyme substrate 1                                      | -2.218 | 0.000945746 |
| <i>YPEL2</i>    | yippee like 2                                                        | -2.225 | 0.03659843  |
| <i>MYOM3</i>    | myomesin 3                                                           | -2.227 | 0.005972415 |
| <i>CCDC144B</i> | coiled-coil domain containing 144B (pseudogene)                      | -2.249 | 0.001094149 |
| <i>NYNRIN</i>   | NYN domain and retroviral integrase containing                       | -2.261 | 0.000468191 |
| <i>SEMA4G</i>   | semaphorin 4G                                                        | -2.270 | 0.000337909 |
| <i>LIPE</i>     | lipase E, hormone sensitive type                                     | -2.272 | 0.000653837 |
| <i>DZIP3</i>    | DAZ interacting zinc finger protein 3                                | -2.279 | 0.046658045 |
| <i>GLUL</i>     | glutamate-ammonia ligase                                             | -2.305 | 0.000219963 |
| <i>ABCG1</i>    | ATP binding cassette subfamily G member 1                            | -2.331 | 0.046463911 |
| <i>ARHGAP18</i> | Rho GTPase activating protein 18                                     | -2.335 | 0.000196072 |
| <i>CALML4</i>   | calmodulin like 4                                                    | -2.340 | 0.000150174 |
| <i>CCNG1</i>    | cyclin G1                                                            | -2.353 | 0.000116327 |
| <i>ASS1</i>     | argininosuccinate synthase 1                                         | -2.357 | 0.00017951  |
| <i>DBP</i>      | D-box binding PAR bZIP transcription factor                          | -2.372 | 0.01126228  |
| <i>FOXP3</i>    | forkhead box N3                                                      | -2.390 | 0.000416047 |
| <i>ADAM22</i>   | ADAM metallopeptidase domain 22                                      | -2.410 | 0.039059095 |
| <i>HOXB8</i>    | homeobox B8                                                          | -2.467 | 3.41E-05    |
| <i>HIST1H1D</i> | histone cluster 1 H1 family member d                                 | -2.490 | 9.33E-05    |
| <i>DIAPH3</i>   | diaphanous related formin 3                                          | -2.494 | 0.005850117 |
| <i>NECTIN3</i>  | nectin cell adhesion molecule 3                                      | -2.500 | 5.38E-05    |
| <i>SAMD12</i>   | sterile alpha motif domain containing 12                             | -2.526 | 9.28E-05    |
| <i>HNF4A</i>    | hepatocyte nuclear factor 4 alpha                                    | -2.533 | 0.009631218 |
| <i>TMC5</i>     | transmembrane channel like 5                                         | -2.541 | 2.49E-05    |
| <i>DMTN</i>     | dematin actin binding protein                                        | -2.548 | 0.020560131 |
| <i>TXNIP</i>    | thioredoxin interacting protein                                      | -2.551 | 2.66E-05    |
| <i>ZNF334</i>   | zinc finger protein 334                                              | -2.551 | 0.032535341 |
| <i>LCN2</i>     | lipocalin 2                                                          | -2.555 | 1.98E-05    |
| <i>RIN2</i>     | Ras and Rab interactor 2                                             | -2.556 | 0.005676915 |
| <i>MECOM</i>    | MDS1 and EVI1 complex locus                                          | -2.558 | 2.75E-05    |
| <i>ACSS1</i>    | acyl-CoA synthetase short-chain family member 1                      | -2.563 | 0.018254584 |
| <i>ARPIN</i>    | actin-related protein 2/3 complex inhibitor                          | -2.565 | 0.00030171  |
| <i>MFSD4A</i>   | major facilitator superfamily domain containing 4A                   | -2.567 | 0.008221302 |
| <i>MUC13</i>    | mucin 13, cell surface associated                                    | -2.575 | 1.40E-05    |
| <i>HGD</i>      | homogentisate 1,2-dioxygenase                                        | -2.576 | 0.030151155 |
| <i>PRNCR1</i>   | prostate cancer associated non-coding RNA 1                          | -2.579 | 0.00011628  |
| <i>PRKCA</i>    | protein kinase C alpha                                               | -2.580 | 1.51E-05    |
| <i>FER</i>      | FER tyrosine kinase                                                  | -2.593 | 0.001425191 |
| <i>SKP2</i>     | S-phase kinase associated protein 2                                  | -2.594 | 0.00012505  |
| <i>SYBU</i>     | syntabulin                                                           | -2.597 | 0.000223022 |
| <i>SYNE2</i>    | spectrin repeat containing nuclear envelope protein 2                | -2.598 | 2.67E-05    |
| <i>HOXA5</i>    | homeobox A5                                                          | -2.609 | 0.044762099 |
| <i>ANK3</i>     | ankyrin 3                                                            | -2.612 | 7.23E-05    |
| <i>PLA2R1</i>   | phospholipase A2 receptor 1                                          | -2.615 | 8.07E-06    |
| <i>CD24</i>     | CD24 molecule                                                        | -2.623 | 1.01E-05    |
| <i>DPYSL2</i>   | dihydropyrimidinase like 2                                           | -2.629 | 0.000965269 |
| <i>ANXA9</i>    | annexin A9                                                           | -2.641 | 0.006048449 |
| <i>DENND5B</i>  | DENN domain containing 5B                                            | -2.645 | 8.86E-06    |
| <i>NRIP1</i>    | nuclear receptor interacting protein 1                               | -2.653 | 7.74E-06    |
| <i>ALDH1A1</i>  | aldehyde dehydrogenase 1 family member A1                            | -2.676 | 3.67E-05    |
| <i>TLR4</i>     | toll like receptor 4                                                 | -2.679 | 0.004074744 |
| <i>SIAE</i>     | sialic acid acetyltransferase                                        | -2.691 | 0.020708638 |
| <i>TSC22D3</i>  | TSC22 domain family member 3                                         | -2.694 | 5.87E-06    |
| <i>PRSS12</i>   | protease, serine 12                                                  | -2.705 | 0.04109117  |
| <i>C1orf21</i>  | chromosome 1 open reading frame 21                                   | -2.718 | 0.012251147 |
| <i>DYNC2H1</i>  | dynein cytoplasmic 2 heavy chain 1                                   | -2.727 | 0.000153055 |
| <i>POF1B</i>    | premature ovarian failure, 1B                                        | -2.728 | 3.17E-06    |
| <i>HOXB3</i>    | homeobox B3                                                          | -2.728 | 1.09E-05    |
| <i>PROS1</i>    | protein S (alpha)                                                    | -2.762 | 6.28E-05    |
| <i>COBLL1</i>   | cordon-bleu WH2 repeat protein like 1                                | -2.780 | 1.27E-05    |



|                      |                                                                                                   |        |             |
|----------------------|---------------------------------------------------------------------------------------------------|--------|-------------|
| <i>TM4SF4</i>        | transmembrane 4 L six family member 4                                                             | -2.799 | 1.99E-05    |
| <i>TEAD2</i>         | TEA domain transcription factor 2                                                                 | -2.802 | 0.001539242 |
| <i>PRR15L</i>        | proline rich 15 like                                                                              | -2.823 | 0.013943702 |
| <i>TRIM2</i>         | tripartite motif containing 2                                                                     | -2.828 | 4.64E-06    |
| <i>LOC105375724</i>  | uncharacterized LOC105375724                                                                      | -2.837 | 6.68E-07    |
| <i>RBPM5</i>         | RNA binding protein with multiple splicing                                                        | -2.841 | 0.036998877 |
| <i>MTA3</i>          | metastasis associated 1 family member 3                                                           | -2.843 | 4.46E-05    |
| <i>BHLHE41</i>       | basic helix-loop-helix family member e41                                                          | -2.909 | 9.84E-07    |
| <i>ENTPD5</i>        | ectonucleoside triphosphate diphosphohydrolase 5                                                  | -2.915 | 2.07E-06    |
| <i>SLC40A1</i>       | solute carrier family 40 member 1                                                                 | -2.932 | 5.30E-07    |
| <i>ABCC4</i>         | ATP binding cassette subfamily C member 4                                                         | -2.945 | 4.24E-07    |
| <i>CREB3L1</i>       | cAMP responsive element binding protein 3 like 1                                                  | -2.969 | 2.46E-07    |
| <i>LOC107986513</i>  | uncharacterized LOC107986513                                                                      | -2.980 | 6.47E-07    |
| <i>AQP5</i>          | aquaporin 5                                                                                       | -2.985 | 0.030244159 |
| <i>MYADM</i>         | myeloid associated differentiation marker                                                         | -3.007 | 0.000638586 |
| <i>CACNA1D</i>       | calcium voltage-gated channel subunit alpha1 D                                                    | -3.017 | 8.23E-05    |
| <i>VIL1</i>          | villin 1                                                                                          | -3.019 | 1.94E-07    |
| <i>LOC730102</i>     | quinone oxidoreductase-like protein 2 pseudogene                                                  | -3.028 | 0.003596785 |
| <i>PTPRJ</i>         | protein tyrosine phosphatase, receptor type J                                                     | -3.064 | 7.04E-08    |
| <i>LOC100287290</i>  | cytokine receptor CRL2                                                                            | -3.067 | 3.33E-05    |
| <i>BCAS1</i>         | breast carcinoma amplified sequence 1                                                             | -3.098 | 4.62E-08    |
| <i>SMARCA1</i>       | SWI/SNF related, matrix associated, actin dependent regulator of chromatin, subfamily a, member 1 | -3.100 | 4.77E-08    |
| <i>XAF1</i>          | XIAP associated factor 1                                                                          | -3.111 | 0.001452029 |
| <i>EHHADH</i>        | enoyl-CoA hydratase and 3-hydroxyacyl CoA dehydrogenase                                           | -3.119 | 0.017953289 |
| <i>ATP8</i>          | ATP synthase F0 subunit 8                                                                         | -3.166 | 1.58E-07    |
| <i>PAPSS2</i>        | 3'-phosphoadenosine 5'-phosphosulfate synthase 2                                                  | -3.198 | 0.000315393 |
| <i>PLCE1</i>         | phospholipase C epsilon 1                                                                         | -3.239 | 0.006894681 |
| <i>KIZ</i>           | kizuna centrosomal protein                                                                        | -3.246 | 6.28E-05    |
| <i>TFPI</i>          | tissue factor pathway inhibitor                                                                   | -3.274 | 7.99E-09    |
| <i>HCAR1</i>         | hydroxycarboxylic acid receptor 1                                                                 | -3.344 | 6.56E-06    |
| <i>TSPAN9</i>        | tetraspanin 9                                                                                     | -3.365 | 1.35E-05    |
| <i>LOC102723409</i>  | uncharacterized LOC102723409                                                                      | -3.408 | 3.88E-06    |
| <i>PDZK1IP1</i>      | PDZK1 interacting protein 1                                                                       | -3.440 | 0.003341487 |
| <i>CLMN</i>          | calmin                                                                                            | -3.459 | 6.31E-08    |
| <i>KANSL1L</i>       | KAT8 regulatory NSL complex subunit 1 like                                                        | -3.507 | 6.17E-08    |
| <i>FGFR2</i>         | fibroblast growth factor receptor 2                                                               | -3.535 | 0.011505071 |
| <i>PTPRB</i>         | protein tyrosine phosphatase, receptor type B                                                     | -3.541 | 2.20E-07    |
| <i>BCL2L15</i>       | BCL2 like 15                                                                                      | -3.546 | 0.000728345 |
| <i>SPRY1</i>         | sprouty RTK signaling antagonist 1                                                                | -3.550 | 0.006659696 |
| <i>USH1C</i>         | USH1 protein network component harmonin                                                           | -3.646 | 2.39E-10    |
| <i>MDK</i>           | midkine (neurite growth-promoting factor 2)                                                       | -3.652 | 1.21E-10    |
| <i>INSR</i>          | insulin receptor                                                                                  | -3.653 | 0.030242524 |
| <i>IFT80</i>         | intraflagellar transport 80                                                                       | -3.710 | 1.28E-06    |
| <i>SLC12A2</i>       | solute carrier family 12 member 2                                                                 | -3.726 | 2.32E-09    |
| <i>SELENBP1</i>      | selenium binding protein 1                                                                        | -3.730 | 0.000269573 |
| <i>F5</i>            | coagulation factor V                                                                              | -3.733 | 1.53E-10    |
| <i>PROM1</i>         | prominin 1                                                                                        | -3.741 | 1.50E-08    |
| <i>SCAMP5</i>        | secretory carrier membrane protein 5                                                              | -3.816 | 0.023177718 |
| <i>GRAMD1B</i>       | GRAM domain containing 1B                                                                         | -3.857 | 3.01E-09    |
| <i>MYRFL</i>         | myelin regulatory factor-like                                                                     | -3.871 | 0.001924602 |
| <i>ADRA2A</i>        | adrenoceptor alpha 2A                                                                             | -3.880 | 0.034275804 |
| <i>HNF4G</i>         | hepatocyte nuclear factor 4 gamma                                                                 | -3.939 | 0.000131103 |
| <i>MTRNR2L2</i>      | MT-RNR2-like 2                                                                                    | -3.939 | 2.51E-10    |
| <i>TP53INP1</i>      | tumor protein p53 inducible nuclear protein 1                                                     | -3.982 | 0.004330053 |
| <i>NDUFC2-KCTD14</i> | NDUFC2-KCTD14 readthrough                                                                         | -4.021 | 0.038850134 |
| <i>SH3PX2A</i>       | SH3 and PX domains 2A                                                                             | -4.048 | 5.57E-05    |
| <i>PDZK1</i>         | PDZ domain containing 1                                                                           | -4.141 | 0.019069817 |
| <i>TSPAN12</i>       | tetraspanin 12                                                                                    | -4.158 | 8.90E-11    |
| <i>CDCA7</i>         | cell division cycle associated 7                                                                  | -4.183 | 1.56E-10    |
| <i>ALDH6A1</i>       | aldehyde dehydrogenase 6 family member A1                                                         | -4.263 | 0.002083909 |
| <i>GDA</i>           | guanine deaminase                                                                                 | -4.331 | 0.00023237  |
| <i>ARHGEF40</i>      | Rho guanine nucleotide exchange factor 40                                                         | -4.356 | 0.00503416  |
| <i>TRAF5</i>         | TNF receptor associated factor 5                                                                  | -4.380 | 1.00E-08    |
| <i>HNF1A</i>         | HNF1 homeobox A                                                                                   | -4.532 | 0.016687695 |
| <i>VWA2</i>          | von Willebrand factor A domain containing 2                                                       | -4.546 | 0.000131819 |



|                     |                                                                  |         |             |
|---------------------|------------------------------------------------------------------|---------|-------------|
| <i>CEACAM7</i>      | carcinoembryonic antigen related cell adhesion molecule 7        | -4.613  | 0.006752896 |
| <i>LOC107985962</i> | uncharacterized LOC107985962                                     | -4.664  | 4.32E-05    |
| <i>ZNF792</i>       | zinc finger protein 792                                          | -4.833  | 0.003104877 |
| <i>IQGAP2</i>       | IQ motif containing GTPase activating protein 2                  | -4.962  | 3.67E-07    |
| <i>MAP2K6</i>       | mitogen-activated protein kinase kinase 6                        | -4.974  | 0.023073852 |
| <i>HOXA10-HOXA9</i> | HOXA10-HOXA9 readthrough                                         | -4.989  | 0.034794494 |
| <i>TPPP3</i>        | tubulin polymerization promoting protein family member 3         | -5.044  | 0.000226304 |
| <i>PPP1R1B</i>      | protein phosphatase 1 regulatory inhibitor subunit 1B            | -5.247  | 0.007164323 |
| <i>PTK7</i>         | protein tyrosine kinase 7 (inactive)                             | -5.286  | 0.008739183 |
| <i>PTGS1</i>        | prostaglandin-endoperoxide synthase 1                            | -5.329  | 2.38E-05    |
| <i>NAALADL2</i>     | N-acetylated alpha-linked acidic dipeptidase like 2              | -5.526  | 7.09E-15    |
| <i>F2R</i>          | coagulation factor II thrombin receptor                          | -5.527  | 4.34E-06    |
| <i>FSIP2</i>        | fibrous sheath interacting protein 2                             | -5.547  | 0.001081339 |
| <i>CLDN2</i>        | claudin 2                                                        | -5.571  | 1.69E-09    |
| <i>LRIG1</i>        | leucine rich repeats and immunoglobulin like domains 1           | -5.643  | 0.038751244 |
| <i>AZGP1</i>        | alpha-2-glycoprotein 1, zinc-binding                             | -5.656  | 0.000436236 |
| <i>MRAS</i>         | muscle RAS oncogene homolog                                      | -5.725  | 3.37E-16    |
| <i>CLRN3</i>        | clarin 3                                                         | -5.779  | 0.010553069 |
| <i>FREM2</i>        | FRAS1 related extracellular matrix protein 2                     | -5.902  | 2.30E-13    |
| <i>MYO7B</i>        | myosin VIIIB                                                     | -5.917  | 0.003193015 |
| <i>PRLR</i>         | prolactin receptor                                               | -6.128  | 5.52E-10    |
| <i>LOC101927627</i> | uncharacterized LOC101927627                                     | -6.253  | 0.011321596 |
| <i>DNMT3B</i>       | DNA methyltransferase 3 beta                                     | -6.294  | 0.036862708 |
| <i>LOC107984897</i> | uncharacterized LOC107984897                                     | -6.295  | 0.017551046 |
| <i>LOC107985977</i> | uncharacterized LOC107985977                                     | -6.362  | 0.035933985 |
| <i>LOC107985783</i> | uncharacterized LOC107985783                                     | -6.429  | 0.028183866 |
| <i>PA2G4P6</i>      | proliferation-associated 2G4 pseudogene 6                        | -6.436  | 0.032981839 |
| <i>IYD</i>          | iodotyrosine deiodinase                                          | -6.666  | 0.026871016 |
| <i>ITGA1</i>        | integrin subunit alpha 1                                         | -6.697  | 0.000147026 |
| <i>STRA6</i>        | stimulated by retinoic acid 6                                    | -7.004  | 0.000189968 |
| <i>CLEC3A</i>       | C-type lectin domain family 3 member A                           | -7.019  | 8.38E-23    |
| <i>AOC1</i>         | amine oxidase, copper containing 1                               | -7.158  | 0.030244159 |
| <i>PTPRO</i>        | protein tyrosine phosphatase, receptor type O                    | -7.233  | 1.83E-08    |
| <i>CFTR</i>         | cystic fibrosis transmembrane conductance regulator              | -7.414  | 1.97E-23    |
| <i>NR5A2</i>        | nuclear receptor subfamily 5 group A member 2                    | -7.531  | 0.014017946 |
| <i>TOX3</i>         | TOX high mobility group box family member 3                      | -7.681  | 0.017790707 |
| <i>LOC105374285</i> | uncharacterized LOC105374285                                     | -7.740  | 0.016739932 |
| <i>LOC105370256</i> | uncharacterized LOC105370256                                     | -7.842  | 1.93E-06    |
| <i>KCNH2</i>        | potassium voltage-gated channel subfamily H member 2             | -8.033  | 0.02795979  |
| <i>LOC105375166</i> | uncharacterized LOC105375166                                     | -8.057  | 0.013750618 |
| <i>ROR1</i>         | receptor tyrosine kinase like orphan receptor 1                  | -8.130  | 1.49E-11    |
| <i>COLCA1</i>       | colorectal cancer associated 1                                   | -8.343  | 5.25E-05    |
| <i>SLC3A1</i>       | solute carrier family 3 member 1                                 | -8.511  | 0.011159164 |
| <i>PBX1</i>         | PBX homeobox 1                                                   | -8.519  | 2.85E-05    |
| <i>DHRS3</i>        | dehydrogenase/reductase 3                                        | -8.612  | 4.61E-09    |
| <i>BANK1</i>        | B-cell scaffold protein with ankyrin repeats 1                   | -8.765  | 0.005544972 |
| <i>SOSTDC1</i>      | sclerostin domain containing 1                                   | -9.013  | 0.006480976 |
| <i>SNORA81</i>      | small nucleolar RNA, H/ACA box 81                                | -9.250  | 0.000662791 |
| <i>HNF1A-AS1</i>    | HNF1A antisense RNA 1                                            | -9.745  | 0.000416047 |
| <i>SELL</i>         | selectin L                                                       | -9.857  | 0.036559843 |
| <i>CHN2</i>         | chimerin 2                                                       | -10.090 | 0.023038258 |
| <i>NR1H4</i>        | nuclear receptor subfamily 1 group H member 4                    | -10.158 | 0.021298522 |
| <i>LOC107986348</i> | uncharacterized LOC107986348                                     | -10.414 | 0.018289346 |
| <i>PPP1R14D</i>     | protein phosphatase 1 regulatory inhibitor subunit 14D           | -10.565 | 0.045192065 |
| <i>SNORA53</i>      | small nucleolar RNA, H/ACA box 53                                | -10.990 | 9.49E-16    |
| <i>DNAJB3</i>       | DnaJ heat shock protein family (Hsp40) member B3                 | -11.268 | 0.002203655 |
| <i>KCNE3</i>        | potassium voltage-gated channel subfamily E regulatory subunit 3 | -11.618 | 1.83E-08    |
| <i>LOC107984117</i> | uncharacterized LOC107984117                                     | -11.737 | 0.008547173 |
| <i>TSPAN8</i>       | tetraspanin 8                                                    | -11.804 | 8.38E-28    |
| <i>COLCA2</i>       | colorectal cancer associated 2                                   | -12.376 | 7.87E-05    |
| <i>NEK11</i>        | NIMA related kinase 11                                           | -12.473 | 0.049862387 |
| <i>UPK3A</i>        | uroplakin 3A                                                     | -13.132 | 0.003980082 |
| <i>SLITRK6</i>      | SLIT and NTRK like family member 6                               | -14.266 | 4.21E-10    |
| <i>CERS6-AS1</i>    | CERS6 antisense RNA 1                                            | -14.612 | 0.019864509 |
| <i>NOX1</i>         | NADPH oxidase 1                                                  | -17.719 | 9.41E-06    |
| <i>CLCA4</i>        | chloride channel accessory 4                                     | -20.665 | 9.95E-05    |

|                     |                                                                     |          |             |
|---------------------|---------------------------------------------------------------------|----------|-------------|
| <i>PIGR</i>         | polymeric immunoglobulin receptor                                   | -24.298  | 1.92E-13    |
| <i>LGR5</i>         | leucine rich repeat containing G protein-coupled receptor 5         | -26.321  | 2.15E-05    |
| <i>RARRES1</i>      | retinoic acid receptor responder 1                                  | -29.233  | 1.71E-31    |
| <i>TCTN1</i>        | tectonic family member 1                                            | -45.813  | 0.031120585 |
| <i>BIVM-ERCC5</i>   | BIVM-ERCC5 readthrough                                              | -50.327  | 1.15E-05    |
| <i>HMGN2P6</i>      | high mobility group nucleosomal binding domain 2 pseudogene 6       | -53.270  | 0.046831057 |
| <i>ZNF487</i>       | zinc finger protein 487                                             | -57.814  | 0.027680754 |
| <i>MIA-RAB4B</i>    | MIA-RAB4B readthrough (NMD candidate)                               | -60.015  | 0.031886731 |
| <i>HPN</i>          | hepsin                                                              | -62.384  | 0.02724668  |
| <i>CFL1P3</i>       | cofilin 1 pseudogene 3                                              | -63.685  | 0.009036343 |
| <i>LOC107984730</i> | vesicle-associated membrane protein-associated protein A pseudogene | -64.050  | 0.00314187  |
| <i>UGT1A1</i>       | UDP glucuronosyltransferase family 1 member A1                      | -64.911  | 0.002848347 |
| <i>ARPC4-TTLL3</i>  | ARPC4-TTLL3 readthrough                                             | -71.115  | 0.00645244  |
| <i>LOC105373828</i> | uncharacterized LOC105373828                                        | -78.850  | 0.004192017 |
| <i>RAB4B-EGLN2</i>  | RAB4B-EGLN2 readthrough (NMD candidate)                             | -98.631  | 0.018980844 |
| <i>CD96</i>         | CD96 molecule                                                       | -100.928 | 0.001141202 |
| <i>KLHL23</i>       | kelch like family member 23                                         | -168.922 | 5.04E-07    |

<sup>1</sup> Slightly different volumes of bacterial inocula were introduced into Flight and Ground cultures (see Methods), which were then allowed to incubate for 6 hr with the host cells. These trends need to be confirmed in future studies.

<sup>2</sup> Significant differences between the Flight and Ground infected cultures were determined according to an FDR < 0.05 and a minimum log<sub>2</sub> fold change of 1 or -1 (2-fold increase or decrease in expression, respectively). Log<sub>2</sub>-fold change values were converted to fold change in this table. Red shading indicates upregulation and blue shading downregulation in the infected Flight culture.

**Supplementary Table 9. Bacterial transcripts expressed in infected Flight HT-29 cultures<sup>1</sup>**

| Gene           | Description                                                            | Fold Change*<br>(above background) | FDR         |
|----------------|------------------------------------------------------------------------|------------------------------------|-------------|
| <i>talB</i>    | transaldolase B                                                        | 341.966                            | 5.66E-10    |
| <i>dnaK</i>    | chaperone protein DnaK                                                 | 566.752                            | 4.39E-15    |
| <i>dnaJ</i>    | chaperone protein DnaJ                                                 | 86.955                             | 0.008884184 |
| <i>nhaA</i>    | Na(+)/H(+) antiporter NhaA                                             | 111.313                            | 0.001491851 |
| <i>ileS</i>    | isoleucine--tRNA ligase                                                | 313.102                            | 1.02E-09    |
| <i>surA</i>    | chaperone SurA                                                         | 137.090                            | 3.63E-05    |
| <i>lpdT</i>    | LPS-assembly protein LptD                                              | 262.983                            | 3.77E-09    |
| <i>mraW</i>    | rRNA small subunit methyltransferase H                                 | 91.179                             | 0.016679775 |
| <i>ftsI</i>    | peptidoglycan synthase FtsI                                            | 144.887                            | 1.29E-05    |
| <i>murE</i>    | UDP-N-acetylmuramoylalanine-D-glutamate--2,6-diaminopimelate ligase    | 137.184                            | 5.61E-05    |
| <i>murD</i>    | UDP-N-acetylmuramoylalanine--D-glutamate ligase                        | 91.266                             | 0.0166552   |
| <i>murC</i>    | UDP-N-acetylmuramate--L-alanine ligase                                 | 135.862                            | 6.01E-05    |
| <i>ftsA</i>    | cell division protein FtsA                                             | 115.883                            | 0.00013139  |
| <i>ftsZ</i>    | cell division protein FtsZ                                             | 222.393                            | 2.45E-08    |
| <i>lpxC</i>    | UDP-3-O-[3-hydroxymyristoyl] N-acetylglucosamine deacetylase           | 510.069                            | 4.24E-12    |
| <i>secA</i>    | preprotein translocase subunit SecA                                    | 177.223                            | 7.63E-07    |
| <i>guaC</i>    | GMP reductase                                                          | 193.552                            | 1.51E-07    |
| <i>aceE</i>    | pyruvate dehydrogenase decarboxylase subunit E1                        | 1592.895                           | 1.47E-43    |
| <i>aceF</i>    | pyruvate dehydrogenase dihydrolipoyltransacetylase subunit E2          | 1062.685                           | 1.22E-25    |
| <i>lpdA</i>    | pyruvate dehydrogenase lipoamide dehydrogenase subunit E3              | 914.682                            | 1.82E-21    |
| <i>acnB</i>    | aconitate hydratase B                                                  | 104.005                            | 0.000508897 |
| <i>yadF</i>    | carbonic anhydrase                                                     | 279.741                            | 2.22E-09    |
| <i>dksA</i>    | RNA polymerase-binding transcription factor                            | 136.358                            | 2.15E-05    |
| <i>mrcB</i>    | transpeptidase/transglycosylase                                        | 107.677                            | 0.000795093 |
| <i>fhuA</i>    | ferrichrome outer membranereceptor/ transporter                        | 325.186                            | 6.69E-10    |
| <i>htrA</i>    | serine endoprotease                                                    | 99.393                             | 0.000684486 |
| <i>dapD</i>    | 2,3,4,5-tetrahydropyridine-2,6-dicarboxylate N-succinyltransferase     | 169.505                            | 9.45E-07    |
| <i>rpsB</i>    | 30S ribosomal protein S2                                               | 496.756                            | 4.24E-12    |
| <i>tsf</i>     | elongation factor Ts                                                   | 427.435                            | 6.07E-11    |
| <i>frr</i>     | ribosome recycling factor                                              | 91.854                             | 0.00685563  |
| <i>yaeL</i>    | zinc metallopeptidase RseP                                             | 177.387                            | 6.57E-07    |
| <i>bamA</i>    | outer membrane protein assembly factor BamA                            | 686.069                            | 2.93E-15    |
| <i>STM0225</i> | chaperone protein Skp                                                  | 168.524                            | 1.96E-06    |
| <i>lpxD</i>    | UDP-3-O-[3-hydroxymyristoyl] glucosamine N-acyltransferase             | 239.145                            | 1.10E-08    |
| <i>lpxA</i>    | acyl-[acyl-carrier-protein]--UDP-N-acetylglucosamine O-acyltransferase | 132.461                            | 9.45E-05    |
| <i>dnaE</i>    | DNA polymerase III subunit alpha                                       | 148.707                            | 7.31E-06    |
| <i>accA</i>    | acetyl-CoA carboxylase carboxyltransferase subunit alpha               | 91.521                             | 0.009143141 |
| <i>proS</i>    | proline--tRNA ligase                                                   | 136.276                            | 4.75E-05    |
| <i>mltD</i>    | membrane-bound lytic murein transglycosylase D                         | 349.436                            | 4.79E-10    |
| <i>pepD</i>    | aminoacyl-histidine dipeptidase                                        | 258.750                            | 4.91E-09    |
| <i>foxA</i>    | ferrioxamine B receptor                                                | 132.379                            | 0.000122485 |
| <i>STM0402</i> | thiol-alkyl hydroperoxide reductase                                    | 357.549                            | 3.81E-10    |
| <i>secD</i>    | preprotein translocase subunit SecD                                    | 164.640                            | 1.04E-06    |
| <i>secF</i>    | preprotein translocase subunit SecF                                    | 140.921                            | 5.94E-05    |
| <i>yajQ</i>    | phage host factor                                                      | 87.121                             | 0.011460819 |
| <i>cyoB</i>    | cytochrome o ubiquinol oxidase subunit I                               | 128.000                            | 2.05E-05    |
| <i>tig</i>     | trigger factor                                                         | 464.979                            | 1.54E-11    |
| <i>clpX</i>    | ATP-dependent protease ATP-binding subunit ClpX                        | 313.104                            | 1.49E-09    |
| <i>lon</i>     | Lon protease                                                           | 534.304                            | 1.75E-13    |
| <i>cypD</i>    | peptidyl-prolyl cis-trans isomerase                                    | 198.525                            | 1.36E-07    |
| <i>ybaY</i>    | outer membrane lipoprotein                                             | 75.007                             | 0.009029474 |
| <i>acrB</i>    | RND family acridine efflux pump                                        | 337.083                            | 5.62E-10    |
| <i>acrA</i>    | acridine efflux pump                                                   | 128.066                            | 0.000268248 |
| <i>STM0478</i> | small-conductance mechanosensitive channel                             | 144.231                            | 3.07E-05    |
| <i>htpG</i>    | chaperone protein HtpG                                                 | 431.399                            | 2.10E-11    |
| <i>ppiB</i>    | peptidyl-prolyl cis-trans isomerase                                    | 140.502                            | 3.74E-05    |
| <i>fepA</i>    | outer membrane porin                                                   | 1069.642                           | 8.68E-25    |

|                |                                                                        |          |             |
|----------------|------------------------------------------------------------------------|----------|-------------|
| <i>fes</i>     | enterochelin esterase                                                  | 304.174  | 1.39E-09    |
| <i>entF</i>    | enterobactin synthase subunit F                                        | 1139.247 | 1.05E-27    |
| <i>fepB</i>    | ferric-enterobactin ABC transporter substrate-binding protein FepB     | 82.643   | 0.01455434  |
| <i>entC</i>    | isochorismate synthase                                                 | 378.947  | 2.35E-10    |
| <i>entE</i>    | 2,3-dihydroxybenzoate-AMP ligase                                       | 718.990  | 3.69E-16    |
| <i>entB</i>    | 2,3-dihydro-2,3-dihydroxybenzoate synthetase                           | 453.288  | 2.94E-11    |
| <i>entA</i>    | 2,3-dihydro-2,3-dihydroxybenzoate dehydrogenase                        | 198.026  | 1.02E-07    |
| <i>ahpC</i>    | alkyl hydroperoxide reductase subunit C                                | 267.389  | 3.94E-09    |
| <i>cspE</i>    | RNA chaperone                                                          | 152.689  | 4.92E-06    |
| <i>lipA</i>    | lipoyl synthase                                                        | 144.080  | 1.36E-05    |
| <i>STM0636</i> | hypothetical protein                                                   | 263.767  | 3.77E-09    |
| <i>dacA</i>    | D-alanyl-D-alanine carboxypeptidase                                    | 95.581   | 0.005682252 |
| <i>leuS</i>    | leucine--tRNA ligase                                                   | 255.387  | 5.22E-09    |
| <i>glnS</i>    | glutamine--tRNA ligase                                                 | 177.222  | 1.03E-06    |
| <i>fldA</i>    | flavodoxin                                                             | 95.326   | 0.013975553 |
| <i>pgm</i>     | phosphoglucomutase                                                     | 185.675  | 2.78E-07    |
| <i>gltA</i>    | citrate synthase                                                       | 124.580  | 0.000146232 |
| <i>sucA</i>    | 2-oxoglutarate dehydrogenase subunit E1                                | 82.735   | 0.008801829 |
| <i>sucB</i>    | 2-oxoglutarate dehydrogenase dihydrolipoyltranssuccinase subunit E2    | 83.145   | 0.018188223 |
| <i>cydA</i>    | cytochrome d terminal oxidase polypeptide subunit I                    | 324.550  | 6.19E-10    |
| <i>cydB</i>    | cytochrome d terminal oxidase polypeptide subunit II                   | 250.981  | 6.37E-09    |
| <i>tolB</i>    | translocation protein TolB                                             | 242.949  | 8.98E-09    |
| <i>pal</i>     | peptidoglycan-associated outer membrane lipoprotein                    | 128.152  | 7.56E-05    |
| <i>aroG</i>    | 3-deoxy-7-phosphoheptulonate synthase                                  | 111.739  | 0.001451907 |
| <i>gpmA</i>    | 2,3-bisphosphoglycerate-dependent phosphoglycerate mutase              | 1416.608 | 1.37E-35    |
| <i>galM</i>    | aldose 1-epimerase                                                     | 103.766  | 0.000353839 |
| <i>ybhC</i>    | pectinesterase                                                         | 124.005  | 0.000443114 |
| <i>uvrB</i>    | excinuclease ABC subunit B                                             | 103.787  | 0.002851449 |
| <i>ybhL</i>    | permease                                                               | 91.620   | 0.022036221 |
| <i>dps</i>     | DNA starvation/stationary phase protection protein                     | 87.062   | 0.000322234 |
| <i>ompX</i>    | outer membrane protease                                                | 1010.648 | 2.72E-23    |
| <i>ybjX</i>    | VirK-like protein                                                      | 160.731  | 3.06E-06    |
| <i>clpA</i>    | ATP-dependent Clp protease ATP-binding subunit                         | 272.415  | 3.09E-09    |
| <i>cydD</i>    | cysteine/glutathione ABC transporter permease/ATP-binding protein CycD | 116.298  | 0.000499058 |
| <i>trxB</i>    | thioredoxin reductase                                                  | 177.877  | 5.73E-07    |
| <i>ftsK</i>    | DNA translocase FtsK                                                   | 242.691  | 9.24E-09    |
| <i>serS</i>    | serine--tRNA ligase                                                    | 116.125  | 0.000239994 |
| <i>pflB</i>    | pyruvate formate lyase I                                               | 1191.943 | 2.41E-30    |
| <i>serC</i>    | 3-phosphoserine/phosphohydroxythreonine aminotransferase               | 144.563  | 2.41E-05    |
| <i>rpsA</i>    | 30S ribosomal protein S1                                               | 1592.990 | 1.15E-43    |
| <i>mukB</i>    | chromosome partition protein MukB                                      | 210.461  | 4.81E-08    |
| <i>ycbL</i>    | metallo-beta-lactamase                                                 | 132.129  | 0.000124372 |
| <i>aspC</i>    | aspartate aminotransferase                                             | 226.792  | 2.27E-08    |
| <i>ompF</i>    | outer membrane protein F                                               | 300.566  | 1.10E-09    |
| <i>asnC</i>    | DNA-binding transcriptional regulator AsnC                             | 263.506  | 3.78E-09    |
| <i>pepN</i>    | aminopeptidase N                                                       | 170.076  | 1.14E-06    |
| <i>ompA</i>    | outer membrane protein A                                               | 1636.462 | 9.54E-45    |
| <i>STM1085</i> | hypothetical protein                                                   | 132.295  | 3.89E-05    |
| <i>ycdW</i>    | glyoxylate/hydroxypyruvate reductase A                                 | 78.739   | 0.049430321 |
| <i>mdoG</i>    | glucan biosynthesis protein G                                          | 152.769  | 8.17E-06    |
| <i>mdoH</i>    | glucans biosynthesis glucosyltransferase H                             | 128.232  | 4.98E-05    |
| <i>grxB</i>    | glutaredoxin                                                           | 119.651  | 2.94E-05    |
| <i>rne</i>     | ribonuclease E                                                         | 341.232  | 4.48E-10    |
| <i>STM1190</i> | hypothetical protein                                                   | 210.378  | 4.72E-08    |
| <i>fabG</i>    | 3-oxoacyl-ACP reductase FabG                                           | 164.959  | 9.45E-07    |
| <i>acpP</i>    | acyl carrier protein                                                   | 317.522  | 8.17E-10    |
| <i>fabF</i>    | 3-oxoacyl-(acyl carrier protein) synthase II                           | 366.311  | 3.03E-10    |
| <i>ptsG</i>    | PTS system glucose-specific transporter subunit IIBC                   | 205.732  | 8.55E-08    |
| <i>fhuE</i>    | ferric-rhodotorulic acid outer membrane transporter                    | 455.347  | 2.58E-11    |
| <i>ndh</i>     | respiratory NADH dehydrogenase 2                                       | 337.084  | 4.83E-10    |
| <i>ycfJ</i>    | outer membrane lipoprotein                                             | 111.739  | 0.001451907 |
| <i>ycfR</i>    | outer membrane protein                                                 | 620.905  | 9.99E-14    |
| <i>mfd</i>     | transcription-repair coupling factor                                   | 95.498   | 0.007651395 |
| <i>phoQ</i>    | virulence sensor histidine kinase PhoQ                                 | 74.683   | 0.046007929 |

|                |                                                           |          |             |
|----------------|-----------------------------------------------------------|----------|-------------|
| <i>phoP</i>    | virulence transcriptional regulator PhoP                  | 161.384  | 3.46E-06    |
| <i>purB</i>    | adenylosuccinate lyase                                    | 79.087   | 0.03745205  |
| <i>icdA</i>    | isocitrate dehydrogenase                                  | 197.695  | 1.15E-07    |
| <i>STM1254</i> | outer membrane lipoprotein                                | 87.471   | 0.026274197 |
| <i>mipA</i>    | murein-synthesizing holoenzymescaffolding protein         | 271.536  | 2.70E-09    |
| <i>gapA</i>    | glyceraldehyde-3-phosphate dehydrogenase                  | 3400.016 | 6.20E-83    |
| <i>sppA</i>    | protease 4                                                | 112.169  | 0.001900915 |
| <i>pfkB</i>    | 6-phosphofructokinase                                     | 78.759   | 0.008835747 |
| <i>thrS</i>    | threonine--tRNA ligase                                    | 173.084  | 4.73E-07    |
| <i>infC</i>    | translation initiation factor IF-3                        | 645.619  | 1.52E-14    |
| <i>rplT</i>    | 50S ribosomal protein L20                                 | 296.329  | 1.59E-09    |
| <i>pheS</i>    | phenylalanine--tRNA ligase subunit alpha                  | 119.945  | 0.000539408 |
| <i>pheT</i>    | phenylalanine--tRNA ligase subunit beta                   | 480.438  | 1.34E-11    |
| <i>ihfA</i>    | integration host factor subunit alpha                     | 111.909  | 0.001441843 |
| <i>STM1345</i> | hypothetical protein                                      | 103.701  | 0.002166443 |
| <i>pps</i>     | phosphoenolpyruvate synthase                              | 74.513   | 0.046422793 |
| <i>ydiJ</i>    | oxidase                                                   | 103.619  | 0.005250623 |
| <i>sufA</i>    | iron-sulfur cluster assembly scaffold protein             | 235.170  | 1.39E-08    |
| <i>sufB</i>    | cysteine desulfurase activator complex subunit SufB       | 1345.176 | 7.11E-34    |
| <i>sufC</i>    | ABC transporter ATP-binding protein                       | 686.942  | 3.36E-15    |
| <i>sufD</i>    | cysteine desulfurase activator complex subunit SufD       | 1110.179 | 7.78E-27    |
| <i>sufS</i>    | bifunctional cysteine desulfurase/selenocysteine lyase    | 705.370  | 1.40E-15    |
| <i>ynhA</i>    | cysteine desulfuration protein SufE                       | 128.069  | 0.000120721 |
| <i>ynhG</i>    | murein L,D-transpeptidase                                 | 119.859  | 0.000726107 |
| <i>lpp</i>     | major outer membrane lipoprotein                          | 625.247  | 2.31E-14    |
| <i>pykF</i>    | pyruvate kinase                                           | 912.272  | 1.25E-20    |
| <i>cfa</i>     | cyclopropane-fatty-acyl-phospholipid synthase             | 144.895  | 2.94E-05    |
| <i>nemaA</i>   | N-ethylmaleimide reductase                                | 107.246  | 0.003313037 |
| <i>slyB</i>    | outer membrane lipoprotein SlyB                           | 206.316  | 6.46E-08    |
| <i>tyrS</i>    | tyrosine--tRNA ligase                                     | 312.110  | 8.17E-10    |
| <i>tpdB</i>    | dipeptide/tripeptide transporter permease A               | 164.791  | 2.88E-06    |
| <i>rsxC</i>    | electron transport complex protein RxC                    | 86.675   | 0.036211033 |
| <i>add</i>     | adenosine deaminase                                       | 107.845  | 0.00133207  |
| <i>ydgA</i>    | periplasmic protein                                       | 115.967  | 0.000508897 |
| <i>manA</i>    | mannose-6-phosphate isomerase                             | 152.769  | 1.55E-05    |
| <i>rstA</i>    | response regulator RstA                                   | 112.075  | 0.001058898 |
| <i>ydgH</i>    | periplasmic protein                                       | 135.941  | 7.86E-05    |
| <i>pntA</i>    | NAD(P) transhydrogenase subunit alpha                     | 374.238  | 2.42E-10    |
| <i>pntB</i>    | NAD(P) transhydrogenase subunit beta                      | 201.922  | 9.72E-08    |
| <i>sfcA</i>    | malate dehydrogenase                                      | 99.893   | 0.003463106 |
| <i>ompD</i>    | outer membrane porin protein OmpD                         | 750.848  | 2.72E-17    |
| <i>STM1586</i> | hypothetical protein                                      | 1115.491 | 1.80E-26    |
| <i>yncB</i>    | NADP-dependent oxidoreductase                             | 78.747   | 0.02287475  |
| <i>tehB</i>    | tellurite resistance protein TehB                         | 136.027  | 6.05E-05    |
| <i>STM1627</i> | alcohol dehydrogenase class III                           | 316.889  | 6.69E-10    |
| <i>ldhA</i>    | D-lactate dehydrogenase                                   | 296.776  | 1.49E-09    |
| <i>fnr</i>     | fumarate/nitrate reduction transcriptional regulator      | 235.255  | 1.33E-08    |
| <i>ydaA</i>    | universal stress protein E                                | 136.520  | 3.74E-05    |
| <i>tpx</i>     | 2-Cys peroxiredoxin                                       | 75.186   | 0.027306016 |
| <i>fabI</i>    | enoyl-ACP reductase FabI                                  | 274.978  | 2.61E-09    |
| <i>rnb</i>     | exoribonuclease II                                        | 197.861  | 1.21E-07    |
| <i>topA</i>    | DNA topoisomerase I                                       | 132.376  | 4.75E-05    |
| <i>STM1731</i> | catalase                                                  | 54.310   | 0.006608703 |
| <i>tonB</i>    | transport protein TonB                                    | 116.138  | 0.000865214 |
| <i>adhE</i>    | bifunctional acetaldehyde-CoA/alcohol dehydrogenase       | 1271.894 | 4.09E-31    |
| <i>hms</i>     | DNA-binding protein H-NS                                  | 436.399  | 4.79E-11    |
| <i>galU</i>    | UTP--glucose-1-phosphate uridylyltransferase subunit GalU | 312.740  | 8.82E-10    |
| <i>prsA</i>    | ribose-phosphate pyrophosphokinase                        | 206.651  | 8.14E-08    |
| <i>ychF</i>    | ribosome-binding ATPase                                   | 95.326   | 0.010310501 |
| <i>STM1808</i> | cytoplasmic protein                                       | 217.826  | 4.24E-08    |
| <i>minD</i>    | ATPase MinD                                               | 156.913  | 6.51E-06    |
| <i>sdaA</i>    | L-serine deaminase I/L-threonine deaminase I              | 124.251  | 0.000118887 |
| <i>manX</i>    | PTS system mannose-specific transporter subunit IIAB      | 83.237   | 0.041103978 |
| <i>prc</i>     | tail-specific protease                                    | 172.995  | 1.53E-06    |
| <i>proQ</i>    | ProP effector                                             | 91.005   | 0.01676257  |
| <i>zwf</i>     | glucose-6-phosphate 1-dehydrogenase                       | 198.110  | 1.38E-07    |



|                |                                                                                                    |          |             |
|----------------|----------------------------------------------------------------------------------------------------|----------|-------------|
| <i>pykA</i>    | pyruvate kinase                                                                                    | 136.194  | 4.75E-05    |
| <i>aspS</i>    | aspartate--tRNA ligase                                                                             | 222.308  | 2.99E-08    |
| <i>otsA</i>    | alpha,alpha-trehalose-phosphate synthase                                                           | 66.647   | 0.034901782 |
| <i>fliC</i>    | flagellin                                                                                          | 877.911  | 2.85E-22    |
| <i>fliD</i>    | flagellar hook-associated protein 2                                                                | 116.125  | 0.000239994 |
| <i>rcaA</i>    | transcriptional regulator RcaA                                                                     | 164.704  | 4.18E-06    |
| <i>STM2059</i> | hypothetical protein                                                                               | 99.123   | 0.008801829 |
| <i>hisG</i>    | ATP phosphoribosyltransferase                                                                      | 103.358  | 0.005317227 |
| <i>hisD</i>    | histidinol dehydrogenase                                                                           | 144.730  | 3.77E-05    |
| <i>hisC</i>    | histidinol-phosphate aminotransferase                                                              | 107.422  | 0.002403211 |
| <i>hisB</i>    | bifunctional imidazole glycerol-phosphate dehydratase/histidinol phosphatase                       | 115.799  | 0.000883894 |
| <i>hisA</i>    | 1-(5-phosphoribosyl)-5-[(5-phosphoribosylamino)methylideneamino] imidazole-4-carboxamide isomerase | 120.542  | 0.000695851 |
| <i>hisF</i>    | imidazole glycerol phosphate synthase subunit HisF                                                 | 144.234  | 2.45E-05    |
| <i>wzzB</i>    | chain length determinant protein                                                                   | 99.216   | 0.004787305 |
| <i>udg</i>     | UDP-glucose 6-dehydrogenase                                                                        | 119.774  | 0.000728572 |
| <i>gnd</i>     | 6-phosphogluconate dehydrogenase                                                                   | 419.607  | 7.52E-11    |
| <i>rfbK</i>    | phosphomannomutase                                                                                 | 95.152   | 0.010361769 |
| <i>rfbM</i>    | mannose-1-phosphate guanylyltransferase                                                            | 107.507  | 0.002394758 |
| <i>rfbH</i>    | lipopolysaccharide biosynthesis protein RfbH                                                       | 325.095  | 7.16E-10    |
| <i>rfbG</i>    | CDP glucose 4,6-dehydratase                                                                        | 152.769  | 8.17E-06    |
| <i>rfbF</i>    | glucose-1-phosphate cytidylyltransferase                                                           | 160.894  | 3.55E-06    |
| <i>galF</i>    | UTP--glucose-1-phosphate uridylyltransferase subunit GalF                                          | 180.957  | 4.82E-07    |
| <i>wcaG</i>    | GDP-fucose synthetase                                                                              | 115.627  | 0.001204791 |
| <i>gmd</i>     | GDP-D-mannose dehydratase                                                                          | 308.772  | 8.17E-10    |
| <i>fbaB</i>    | fructose-bisphosphate aldolase                                                                     | 103.684  | 0.000188095 |
| <i>mrp</i>     | ATP-binding protein                                                                                | 83.413   | 0.040755941 |
| <i>metG</i>    | methionine--tRNA ligase                                                                            | 144.399  | 2.43E-05    |
| <i>dld</i>     | D-lactate dehydrogenase                                                                            | 108.106  | 0.002314828 |
| <i>cirA</i>    | catecholate siderophore receptor CirA                                                              | 1353.962 | 4.04E-35    |
| <i>fruA</i>    | PTS system fructose-specific transporter subunit IIBC                                              | 346.207  | 3.85E-10    |
| <i>fruK</i>    | 1-phosphofructokinase                                                                              | 94.998   | 0.003463106 |
| <i>fruF</i>    | bifunctional PTS system fructose-specific transporter subunit IIA/HPr protein                      | 272.063  | 3.05E-09    |
| <i>ompC</i>    | outer membrane porin protein C                                                                     | 276.390  | 3.61E-09    |
| <i>gyrA</i>    | DNA gyrase subunit A                                                                               | 311.379  | 1.49E-09    |
| <i>nrdA</i>    | ribonucleotide-diphosphate reductase subunit alpha                                                 | 169.181  | 1.19E-06    |
| <i>yfbE</i>    | UDP-4-amino-4-deoxy-L-arabinose--oxoglutarate aminotransferase                                     | 103.445  | 0.005298763 |
| <i>yfbG</i>    | bifunctional UDP-glucuronic acid decarboxylase/UDP-4-amino-4-deoxy-L-arabinose formyltransferase   | 144.229  | 3.89E-05    |
| <i>yfbT</i>    | phosphatase                                                                                        | 91.266   | 0.0166552   |
| <i>ackA</i>    | acetate kinase                                                                                     | 624.861  | 4.38E-14    |
| <i>pta</i>     | phosphate acetyltransferase                                                                        | 739.651  | 6.17E-17    |
| <i>accD</i>    | acetyl-CoA carboxylase carboxyltransferase subunit beta                                            | 116.205  | 0.000239879 |
| <i>fabB</i>    | 3-oxoacyl-ACP synthase                                                                             | 193.881  | 1.15E-07    |
| <i>aroC</i>    | chorismate synthase                                                                                | 99.298   | 0.008732494 |
| <i>gltX</i>    | glutamate--tRNA ligase                                                                             | 103.532  | 0.003874387 |
| <i>zipA</i>    | cell division protein ZipA                                                                         | 95.239   | 0.01032549  |
| <i>cysK</i>    | cysteine synthase A                                                                                | 161.057  | 3.00E-06    |
| <i>ptsH</i>    | PTS system phosphohistidinoprotein-hexose phosphotransferase Hpr                                   | 79.346   | 0.036990212 |
| <i>ptsI</i>    | phosphoenolpyruvate-protein phosphotransferase                                                     | 771.606  | 7.06E-18    |
| <i>crr</i>     | PTS system glucose-specific transporter subunit IIA                                                | 238.034  | 1.12E-08    |
| <i>maeB</i>    | malic enzyme                                                                                       | 87.386   | 0.034885393 |
| <i>tktB</i>    | transketolase                                                                                      | 58.227   | 0.029903073 |
| <i>nlpB</i>    | outer membrane protein assembly factor BamC                                                        | 177.224  | 6.70E-07    |
| <i>dapA</i>    | 4-hydroxy-tetrahydrodipicolinate synthase                                                          | 197.694  | 1.41E-07    |
| <i>guaA</i>    | GMP synthase                                                                                       | 82.177   | 5.24E-09    |
| <i>guaB</i>    | inosine 5'-monophosphate dehydrogenase                                                             | 522.330  | 3.06E-12    |
| <i>engA</i>    | GTP-binding protein EngA                                                                           | 95.239   | 0.01032549  |
| <i>bamB</i>    | uter membrane protein assembly factor BamB                                                         | 160.894  | 3.55E-06    |
| <i>hisS</i>    | histidine--tRNA ligase                                                                             | 136.679  | 2.50E-05    |
| <i>ispG</i>    | 4-hydroxy-3-methylbut-2-en-1-yl diphosphate synthase (flavodoxin)                                  | 124.254  | 0.000190443 |
| <i>hscA</i>    | chaperone protein HscA                                                                             | 144.482  | 1.58E-05    |
| <i>STM2542</i> | iron-sulfur cluster assembly scaffold protein                                                      | 95.501   | 0.013853016 |



|                |                                                                      |          |             |
|----------------|----------------------------------------------------------------------|----------|-------------|
| <i>nifS</i>    | cysteine desulfurase                                                 | 390.650  | 1.52E-10    |
| <i>yfhP</i>    | HTH-type transcriptional regulator IscR                              | 345.197  | 4.27E-10    |
| <i>glyA</i>    | serine hydroxymethyltransferase                                      | 173.405  | 4.68E-07    |
| <i>hmpA</i>    | bifunctional nitric oxide dioxygenase/dihydropteridine reductase     | 509.589  | 5.75E-12    |
| <i>purG</i>    | phosphoribosylformylglycinamide synthase                             | 83.147   | 0.030839015 |
| <i>lepB</i>    | signal peptidase I                                                   | 91.021   | 0.004276768 |
| <i>lepA</i>    | elongation factor 4                                                  | 144.239  | 1.60E-05    |
| <i>rseA</i>    | anti-sigma E factor RseA                                             | 164.873  | 2.87E-06    |
| <i>rpoE</i>    | ECF RNA polymerase sigma factor RpoE                                 | 131.716  | 9.92E-05    |
| <i>rrlG</i>    | 23S ribosomal RNA                                                    | 1349.750 | 5.63E-148   |
| <i>clpB</i>    | chaperone protein ClpB                                               | 309.315  | 1.42E-09    |
| <i>yfiO</i>    | outer membrane protein assembly factor BamD                          | 79.000   | 0.037584526 |
| <i>yfiA</i>    | translation inhibitor protein RaiA                                   | 144.565  | 2.35E-06    |
| <i>rplS</i>    | 50S ribosomal protein L19                                            | 94.984   | 0.007866572 |
| <i>trmD</i>    | tRNA (guanine-N(1)-)-methyltransferase                               | 177.958  | 5.12E-07    |
| <i>rimM</i>    | ribosome maturation factor RimM                                      | 181.287  | 3.59E-07    |
| <i>ffh</i>     | signal recognition particle protein                                  | 95.155   | 0.007794176 |
| <i>grpE</i>    | heat shock protein GrpE                                              | 144.565  | 3.27E-06    |
| <i>iroB</i>    | glycosyl transferase                                                 | 641.177  | 1.46E-14    |
| <i>iroC</i>    | ABC transporter ATP-binding protein                                  | 743.803  | 1.46E-16    |
| <i>iroD</i>    | enterochelin esterase-like protein                                   | 79.085   | 0.029019319 |
| <i>iroE</i>    | alpha/beta superfamily hydrolase                                     | 128.235  | 0.000265768 |
| <i>iroN</i>    | iron-enterobactin outer membrane transporter FepA                    | 2863.691 | 1.68E-73    |
| <i>virK</i>    | VirK-like protein                                                    | 99.472   | 0.003550264 |
| <i>mig-14</i>  | transcriptional activator                                            | 186.091  | 4.68E-07    |
| <i>ygaU</i>    | LysM domain/BON superfamily protein                                  | 46.434   | 0.03186216  |
| <i>stpA</i>    | DNA binding protein StpA                                             | 107.841  | 0.000789508 |
| <i>ygaM</i>    | inner membrane protein                                               | 71.033   | 0.027171871 |
| <i>nrdI</i>    | ribonucleotide reductase stimulatory protein                         | 149.113  | 1.00E-05    |
| <i>nrdE</i>    | ribonucleotide-diphosphate reductase subunit alpha                   | 1100.334 | 2.74E-25    |
| <i>nrdF</i>    | ribonucleotide-diphosphate reductase subunit beta                    | 456.012  | 2.68E-11    |
| <i>alaS</i>    | alanine--tRNA ligase                                                 | 432.910  | 5.07E-11    |
| <i>recA</i>    | recombinase A                                                        | 322.124  | 6.49E-10    |
| <i>sitA</i>    | Fur regulated iron ABC transporter substrate-binding protein SitA    | 231.451  | 1.75E-08    |
| <i>sitB</i>    | Fur regulated iron ABC transporter ATP-binding protein SitB          | 82.740   | 0.006944022 |
| <i>sipC</i>    | cell invasion protein SipC                                           | 74.771   | 0.028037755 |
| <i>mutS</i>    | DNA mismatch repair protein MutS                                     | 86.944   | 0.027018766 |
| <i>rpoS</i>    | RNA polymerase sigma factor RpoS                                     | 1008.823 | 3.06E-25    |
| <i>nlpD</i>    | Murein hydrolase activator NlpD                                      | 907.538  | 8.46E-21    |
| <i>eno</i>     | enolase                                                              | 2390.934 | 5.75E-64    |
| <i>pyrG</i>    | CTP synthase                                                         | 346.852  | 4.68E-10    |
| <i>relA</i>    | (P)ppGpp synthetase I                                                | 140.665  | 2.96E-05    |
| <i>STM2963</i> | flavodoxin                                                           | 119.776  | 0.000544498 |
| <i>queF</i>    | 7-cyano-7-deazaguanine reductase                                     | 82.974   | 0.024226675 |
| <i>ygdH</i>    | nucleotide binding protein                                           | 108.162  | 0.000607636 |
| <i>ptsP</i>    | fused phosphoenolpyruvate-protein phosphotransferase PtsP/GAF domain | 87.121   | 0.011460819 |
| <i>lysS</i>    | lysine--tRNA ligase                                                  | 338.000  | 6.19E-10    |
| <i>prfB</i>    | peptide chain release factor 2                                       | 107.265  | 0.001054219 |
| <i>gcvP</i>    | glycine dehydrogenase                                                | 238.718  | 1.10E-08    |
| <i>gcvT</i>    | glycine cleavage system aminomethyltransferase T                     | 160.567  | 3.61E-06    |
| <i>pepP</i>    | proline aminopeptidase P II                                          | 99.638   | 0.002663035 |
| <i>rpiA</i>    | ribose-5-phosphate isomerase A                                       | 91.092   | 0.016737514 |
| <i>fba</i>     | fructose-bisphosphate aldolase                                       | 1220.524 | 1.45E-30    |
| <i>pgk</i>     | phosphoglycerate kinase                                              | 1034.879 | 1.99E-24    |
| <i>tktA</i>    | transketolase                                                        | 771.027  | 6.57E-18    |
| <i>speB</i>    | agmatinase                                                           | 79.259   | 0.037120907 |
| <i>speA</i>    | arginine decarboxylase                                               | 91.474   | 0.000381687 |
| <i>metK</i>    | methionine adenosyltransferase                                       | 279.388  | 2.20E-09    |
| <i>yggN</i>    | periplasmic protein                                                  | 132.380  | 0.000160331 |
| <i>exbB</i>    | biopolymer transport protein ExbB                                    | 185.759  | 4.74E-07    |
| <i>parC</i>    | DNA topoisomerase IV subunit A                                       | 115.884  | 0.000667121 |
| <i>parE</i>    | DNA topoisomerase IV subunit B                                       | 107.002  | 0.001848666 |
| <i>tolC</i>    | outer membrane channel protein                                       | 214.607  | 4.23E-08    |
| <i>STM3187</i> | hypothetical protein                                                 | 103.453  | 0.001018282 |
| <i>ygiC</i>    | glutathionylspermidine synthase                                      | 78.660   | 0.029772505 |

|                |                                                                |          |             |
|----------------|----------------------------------------------------------------|----------|-------------|
| <i>dnaG</i>    | DNA primase                                                    | 99.307   | 0.002108061 |
| <i>rpoD</i>    | RNA polymerase sigma factor RpoD                               | 309.498  | 1.59E-09    |
| <i>rnpB</i>    | miscRNA                                                        | 5956.497 | 1.40E-100   |
| <i>STM3264</i> | hypothetical protein                                           | 86.857   | 0.027059    |
| <i>yraP</i>    | periplasmic protein                                            | 82.974   | 0.024226675 |
| <i>deaD</i>    | ATP-dependent RNA helicase DeaD                                | 185.349  | 2.29E-07    |
| <i>nlpI</i>    | lipoprotein NlpI                                               | 230.853  | 1.58E-08    |
| <i>pnp</i>     | polyribonucleotide nucleotidyltransferase                      | 346.024  | 4.83E-10    |
| <i>infB</i>    | translation initiation factor IF-2                             | 451.863  | 2.68E-11    |
| <i>nusA</i>    | transcription termination/antitermination protein NusA         | 136.516  | 1.55E-05    |
| <i>hflB</i>    | ATP-dependent metalloprotease                                  | 658.460  | 7.25E-15    |
| <i>rpmA</i>    | 50S ribosomal protein L27                                      | 112.143  | 0.000384927 |
| <i>rplU</i>    | 50S ribosomal protein L21                                      | 180.881  | 3.41E-07    |
| <i>murA</i>    | UDP-N-acetylglucosamine 1-carboxyvinyltransferase              | 107.509  | 0.001788389 |
| <i>rpoN</i>    | RNA polymerase factor sigma-54                                 | 127.755  | 5.15E-05    |
| <i>sspA</i>    | stringent starvation protein A                                 | 128.316  | 0.000118887 |
| <i>rpsI</i>    | 30S ribosomal protein S9                                       | 214.272  | 4.26E-08    |
| <i>rplM</i>    | 50S ribosomal protein L13                                      | 259.098  | 4.87E-09    |
| <i>degQ</i>    | serine endoprotease                                            | 95.501   | 0.013853016 |
| <i>mdh</i>     | malate dehydrogenase                                           | 136.436  | 1.18E-05    |
| <i>accB</i>    | acetyl-CoA carboxylase biotin carboxyl carrier protein subunit | 107.260  | 0.001385671 |
| <i>accC</i>    | acetyl-CoA carboxylase biotin carboxylase subunit              | 369.625  | 2.35E-10    |
| <i>rrlD</i>    | 23S ribosomal RNA                                              | 3066.503 | 4.90E-159   |
| <i>rrsD</i>    | 16S ribosomal RNA                                              | 1218.134 | 8.97E-32    |
| <i>rplQ</i>    | 50S ribosomal protein L17                                      | 250.981  | 7.26E-09    |
| <i>rpoA</i>    | DNA-directed RNA polymerase subunit alpha                      | 237.033  | 1.09E-26    |
| <i>rpsD</i>    | 30S ribosomal protein S4                                       | 526.961  | 1.96E-12    |
| <i>rpsK</i>    | 30S ribosomal protein S11                                      | 267.477  | 3.77E-09    |
| <i>rpsM</i>    | 30S ribosomal protein S13                                      | 131.892  | 4.90E-05    |
| <i>secY</i>    | preprotein translocase subunit SecY                            | 1006.777 | 8.25E-26    |
| <i>rplO</i>    | 50S ribosomal protein L15                                      | 419.701  | 7.52E-11    |
| <i>rpsE</i>    | 30S ribosomal protein S5                                       | 308.592  | 1.57E-09    |
| <i>rplR</i>    | 50S ribosomal protein L18                                      | 99.550   | 0.001018282 |
| <i>rplF</i>    | 50S ribosomal protein L6                                       | 73.454   | 1.67E-08    |
| <i>rpsH</i>    | 30S ribosomal protein S8                                       | 152.524  | 8.25E-06    |
| <i>rpsN</i>    | 30S ribosomal protein S14                                      | 153.009  | 3.60E-06    |
| <i>rplE</i>    | 50S ribosomal protein L5                                       | 45.020   | 6.24E-08    |
| <i>rplX</i>    | 50S ribosomal protein L24                                      | 115.718  | 0.000516519 |
| <i>rplN</i>    | 50S ribosomal protein L14                                      | 23.301   | 3.11E-05    |
| <i>rpsQ</i>    | 30S ribosomal protein S17                                      | 111.906  | 0.000814079 |
| <i>rplP</i>    | 50S ribosomal protein L16                                      | 303.455  | 1.38E-09    |
| <i>rpsC</i>    | 30S ribosomal protein S3                                       | 494.224  | 2.97E-12    |
| <i>rplV</i>    | 50S ribosomal protein L22                                      | 107.598  | 0.000406278 |
| <i>rpsS</i>    | 30S ribosomal protein S19                                      | 99.389   | 0.002100381 |
| <i>rplB</i>    | 50S ribosomal protein L2                                       | 517.987  | 8.65E-13    |
| <i>rplW</i>    | 50S ribosomal protein L23                                      | 132.135  | 3.93E-05    |
| <i>rplD</i>    | 50S ribosomal protein L4                                       | 312.287  | 1.41E-09    |
| <i>rplC</i>    | 50S ribosomal protein L3                                       | 588.557  | 8.00E-14    |
| <i>rpsJ</i>    | 30S ribosomal protein S10                                      | 103.536  | 0.000251559 |
| <i>tuf</i>     | elongation factor Tu                                           | 1309.641 | 4.78E-35    |
| <i>fusA</i>    | elongation factor G                                            | 1959.349 | 1.39E-54    |
| <i>rpsG</i>    | 30S ribosomal protein S7                                       | 267.302  | 3.77E-09    |
| <i>rpsL</i>    | 30S ribosomal protein S12                                      | 164.715  | 1.58E-06    |
| <i>fkpA</i>    | FKBP-type peptidyl-prolyl cis-trans isomerase                  | 325.643  | 1.01E-09    |
| <i>slyD</i>    | FKBP-type peptidyl-prolyl cis-trans isomerase                  | 103.534  | 0.001298241 |
| <i>crp</i>     | cAMP-activated global transcriptional regulator                | 82.573   | 0.00885116  |
| <i>ppiA</i>    | peptidyl-prolyl cis-trans isomerase A                          | 86.864   | 0.01536003  |
| <i>trpS</i>    | tryptophan--tRNA ligase                                        | 107.762  | 0.001765289 |
| <i>damX</i>    | membrane protein                                               | 124.334  | 0.000148068 |
| <i>aroB</i>    | 3-dehydroquinate synthase                                      | 115.635  | 0.000518276 |
| <i>yhgF</i>    | RNase R                                                        | 153.095  | 6.68E-06    |
| <i>feoB</i>    | ferrous iron transport protein B                               | 206.648  | 5.91E-08    |
| <i>yhgI</i>    | Fe/S biogenesis protein NfuA                                   | 168.775  | 1.24E-06    |
| <i>glpD</i>    | glycerol-3-phosphate dehydrogenase                             | 772.473  | 3.07E-19    |
| <i>asd</i>     | aspartate-semialdehyde dehydrogenase                           | 86.950   | 0.015304929 |
| <i>rpoH</i>    | RNA polymerase sigma factor RpoH                               | 288.301  | 2.04E-09    |

|                |                                                                                                            |           |             |
|----------------|------------------------------------------------------------------------------------------------------------|-----------|-------------|
| <i>ftsY</i>    | signal recognition particle receptor FtsY                                                                  | 107.935   | 0.002336607 |
| <i>STM3580</i> | inner membrane lipoprotein                                                                                 | 107.509   | 0.001788389 |
| <i>pitA</i>    | low-affinity phosphate transporter                                                                         | 103.271   | 0.005324251 |
| <i>uspA</i>    | universal stress protein A                                                                                 | 91.187    | 0.001735388 |
| <i>prlC</i>    | oligopeptidase A                                                                                           | 148.629   | 1.83E-06    |
| <i>gor</i>     | glutathione oxidoreductase                                                                                 | 140.421   | 1.42E-05    |
| <i>treF</i>    | trehalase                                                                                                  | 62.702    | 0.006719178 |
| <i>glyS</i>    | glycine--tRNA ligase subunit beta                                                                          | 214.104   | 4.18E-08    |
| <i>glyQ</i>    | glycine--tRNA ligase subunit alpha                                                                         | 128.151   | 0.000201317 |
| <i>STM3663</i> | hypothetical protein                                                                                       | 140.584   | 3.73E-05    |
| <i>mtlA</i>    | PTS system mannitol-specific transporter subunit IIABC                                                     | 127.736   | 0.000158277 |
| <i>mtlD</i>    | mannitol-1-phosphate 5-dehydrogenase                                                                       | 111.901   | 0.000389915 |
| <i>tdh</i>     | L-threonine 3-dehydrogenase                                                                                | 144.401   | 1.59E-05    |
| <i>kbl</i>     | 2-amino-3-ketobutyrate CoA ligase                                                                          | 91.521    | 0.009143141 |
| <i>rfaD</i>    | ADP-L-glycero-D-manno-heptose-6-epimerase                                                                  | 108.185   | 0.001726124 |
| <i>spoT</i>    | bifunctional (p)ppGpp synthetase II/ guanosine-3',5'-bis pyrophosphate 3'-pyrophosphohydrolase             | 115.469   | 0.000523201 |
| <i>cigR</i>    | inner membrane protein                                                                                     | 79.526    | 0.047537052 |
| <i>gyrB</i>    | DNA gyrase subunit B                                                                                       | 279.917   | 2.28E-09    |
| <i>gidC</i>    | membrane protein insertase YidC                                                                            | 194.212   | 1.57E-07    |
| <i>glmS</i>    | glucosamine--fructose-6-phosphate aminotransferase                                                         | 210.461   | 4.94E-08    |
| <i>glmU</i>    | bifunctional N-acetylglucosamine-1-phosphate uridylyltransferase/glucosamine-1-phosphate acetyltransferase | 165.038   | 1.55E-06    |
| <i>atpD</i>    | F0F1 ATP synthase subunit beta                                                                             | 487.977   | 6.60E-12    |
| <i>atpG</i>    | F0F1 ATP synthase subunit gamma                                                                            | 218.921   | 2.99E-08    |
| <i>atpA</i>    | F0F1 ATP synthase subunit alpha                                                                            | 806.172   | 2.54E-18    |
| <i>atpH</i>    | F0F1 ATP synthase subunit delta                                                                            | 78.742    | 0.038123195 |
| <i>atpF</i>    | F0F1 ATP synthase subunit B                                                                                | 152.851   | 6.68E-06    |
| <i>gidA</i>    | tRNA uridine 5-carboxymethylaminomethyl modification protein<br>GidA                                       | 140.584   | 3.73E-05    |
| <i>rrlC</i>    | 23S ribosomal RNA                                                                                          | 18320.494 | 8.75E-194   |
| <i>STM3898</i> | hypothetical protein                                                                                       | 120.112   | 0.000406278 |
| <i>ilvE</i>    | branched-chain amino acid aminotransferase                                                                 | 87.120    | 0.019961856 |
| <i>ilvC</i>    | ketol-acid reductoisomerase                                                                                | 53.447    | 2.68E-07    |
| <i>rhlB</i>    | ATP-dependent RNA helicase RhlB                                                                            | 99.386    | 0.006385292 |
| <i>trxA</i>    | thioredoxin                                                                                                | 144.726   | 1.56E-05    |
| <i>rho</i>     | transcription termination factor Rho                                                                       | 325.004   | 6.69E-10    |
| <i>wzzE</i>    | lipopolysaccharide biosynthesis protein WzzE                                                               | 83.060    | 0.031556083 |
| <i>wecC</i>    | UDP-N-acetyl-D-mannosamine dehydrogenase                                                                   | 91.178    | 0.022537304 |
| <i>cyaA</i>    | adenylate cyclase                                                                                          | 316.256   | 7.98E-10    |
| <i>uvrD</i>    | DNA-dependent helicase II                                                                                  | 107.336   | 0.002411705 |
| <i>udp</i>     | uridine phosphorylase                                                                                      | 144.646   | 2.40E-05    |
| <i>ubiE</i>    | ubiquinone/menaquinone biosynthesis C-methyltransferase UbiE                                               | 79.001    | 0.04883916  |
| <i>ubiB</i>    | protein kinase UbiB                                                                                        | 87.295    | 0.026503262 |
| <i>yigC</i>    | inner membrane protein; 3-octaprenyl-4-hydroxybenzoate decarboxylase                                       | 82.886    | 0.031834397 |
| <i>pepQ</i>    | Xaa-Pro dipeptidase                                                                                        | 86.963    | 0.004273201 |
| <i>rrlA</i>    | 23S ribosomal RNA                                                                                          | 7479.076  | 9.53E-174   |
| <i>dsbA</i>    | thiol:disulfide interchange protein DsbA                                                                   | 95.412    | 0.007678716 |
| <i>polA</i>    | DNA polymerase I                                                                                           | 127.900   | 0.000204432 |
| <i>STM4002</i> | cytoplasmic protein                                                                                        | 595.415   | 1.30E-13    |
| <i>glnA</i>    | glutamine synthetase                                                                                       | 119.863   | 0.000318257 |
| <i>typA</i>    | GTP-binding elongation factor family protein                                                               | 365.568   | 3.38E-10    |
| <i>fdoG</i>    | formate dehydrogenase large subunit                                                                        | 78.490    | 0.029988932 |
| <i>sodA</i>    | superoxide dismutase                                                                                       | 365.661   | 3.70E-10    |
| <i>cpxA</i>    | sensory kinase CpxS                                                                                        | 128.645   | 0.000116717 |
| <i>cpxP</i>    | cpx regulon periplasmic repressor                                                                          | 119.792   | 7.19E-05    |
| <i>pfkA</i>    | 6-phosphofructokinase                                                                                      | 148.949   | 8.41E-06    |
| <i>tpiA</i>    | triosephosphate isomerase                                                                                  | 530.056   | 1.84E-12    |
| <i>menG</i>    | ribonuclease activity regulator protein RraA                                                               | 112.412   | 0.001039014 |
| <i>hslU</i>    | ATP-dependent protease ATPase subunit HslU                                                                 | 181.773   | 2.18E-07    |
| <i>STM4118</i> | phosphoethanolamine transferase CptA                                                                       | 148.461   | 1.56E-05    |
| <i>ppc</i>     | phosphoenolpyruvate carboxylase                                                                            | 226.962   | 2.02E-08    |
| <i>oxyR</i>    | DNA-binding transcriptional regulator OxyR                                                                 | 99.556    | 0.003537433 |
| <i>rrlB</i>    | 23S ribosomal RNA                                                                                          | 4457.818  | 6.23E-150   |
| <i>tuf</i>     | elongation factor Tu                                                                                       | 1322.760  | 1.12E-34    |

|                |                                                                            |           |             |
|----------------|----------------------------------------------------------------------------|-----------|-------------|
| <i>nusG</i>    | transcription termination/antitermination protein NusG                     | 91.005    | 0.01676257  |
| <i>rplK</i>    | 50S ribosomal protein L11                                                  | 32.662    | 0.000188901 |
| <i>rplA</i>    | 50S ribosomal protein L1                                                   | 472.519   | 1.33E-11    |
| <i>rplJ</i>    | 50S ribosomal protein L10                                                  | 411.400   | 9.47E-11    |
| <i>rplL</i>    | 50S ribosomal protein L7/L12                                               | 234.914   | 1.31E-08    |
| <i>rpoB</i>    | DNA-directed RNA polymerase subunit beta                                   | 1323.848  | 1.42E-33    |
| <i>rpoC</i>    | DNA-directed RNA polymerase subunit beta'                                  | 1579.582  | 3.60E-41    |
| <i>hupA</i>    | DNA-binding protein HU-alpha                                               | 128.317   | 0.00015212  |
| <i>rrlE</i>    | 23S ribosomal RNA                                                          | 36296.432 | 1.34E-139   |
| <i>metH</i>    | B12-dependent methionine synthase                                          | 74.769    | 0.045842849 |
| <i>pgi</i>     | glucose-6-phosphate isomerase                                              | 407.909   | 1.04E-10    |
| <i>yjbH</i>    | outer membrane lipoprotein                                                 | 95.501    | 0.013853016 |
| <i>plsB</i>    | glycerol-3-phosphate acyltransferase                                       | 152.039   | 7.17E-06    |
| <i>lexA</i>    | LexA repressor                                                             | 103.618   | 0.003860697 |
| <i>uvrA</i>    | excinuclease ABC subunit A                                                 | 99.388    | 0.003563157 |
| <i>ssb</i>     | single-stranded DNA-binding protein                                        | 132.213   | 7.53E-05    |
| <i>STM4261</i> | inner membrane protein                                                     | 235.774   | 1.71E-08    |
| <i>proP</i>    | proline/betaine transporter                                                | 116.212   | 0.000386754 |
| <i>aspA</i>    | aspartate ammonia-lyase                                                    | 62.431    | 0.030839015 |
| <i>groES</i>   | co-chaperonin GroES                                                        | 111.667   | 9.26E-05    |
| <i>groEL</i>   | chaperonin GroEL                                                           | 1779.354  | 1.12E-53    |
| <i>efp</i>     | elongation factor P                                                        | 165.119   | 2.37E-06    |
| <i>miaA</i>    | tRNA dimethylallyltransferase                                              | 111.308   | 0.002010453 |
| <i>hfq</i>     | RNA-binding protein Hfq                                                    | 99.051    | 0.003639612 |
| <i>hflX</i>    | GTPase HflX                                                                | 136.118   | 2.60E-05    |
| <i>hflK</i>    | FtsH protease regulator HflK                                               | 218.753   | 3.25E-08    |
| <i>hflC</i>    | FtsH protease regulator HflC                                               | 201.922   | 9.13E-08    |
| <i>purA</i>    | adenylosuccinate synthetase                                                | 255.560   | 5.37E-09    |
| <i>vacB</i>    | ribonuclease R                                                             | 235.085   | 1.36E-08    |
| <i>rpsF</i>    | 30S ribosomal protein S6                                                   | 107.251   | 0.002415638 |
| <i>rplI</i>    | 50S ribosomal protein L9                                                   | 148.306   | 7.50E-06    |
| <i>ytfE</i>    | iron-sulfur cluster repair protein                                         | 107.847   | 0.001759067 |
| <i>ytfM</i>    | outer membrane protein                                                     | 115.715   | 0.000886947 |
| <i>ytfN</i>    | periplasmic protein                                                        | 185.344   | 4.82E-07    |
| <i>ppa</i>     | inorganic pyrophosphatase                                                  | 246.664   | 7.53E-09    |
| <i>fbp</i>     | fructose-1,6-bisphosphatase                                                | 124.334   | 0.000148068 |
| <i>mpl</i>     | UDP-N-acetylmuramate:L-alanyl-gamma-D-glutamyl-meso-diaminopimelate ligase | 79.167    | 0.022367956 |
| <i>valS</i>    | valine--tRNA ligase                                                        | 329.426   | 6.58E-10    |
| <i>pepA</i>    | cytosol aminopeptidase                                                     | 107.922   | 0.000786737 |
| <i>yjgP</i>    | permease                                                                   | 107.507   | 0.002394758 |
| <i>yjgQ</i>    | permease                                                                   | 91.528    | 0.016451292 |
| <i>STM4492</i> | cytoplasmic protein                                                        | 79.089    | 0.04867233  |
| <i>STM4496</i> | DNA repair ATPase                                                          | 169.344   | 1.06E-06    |
| <i>STM4519</i> | NAD-dependent aldehyde dehydrogenase                                       | 42.076    | 0.038336009 |
| <i>mdoB</i>    | phosphoglycerol transferase I                                              | 111.657   | 0.000642458 |
| <i>fluF</i>    | ferric hydroximate transport ferric iron reductase                         | 189.738   | 3.85E-07    |
| <i>osmY</i>    | hyperosmotically inducible periplasmic protein                             | 66.645    | 0.001693119 |
| <i>deoC</i>    | 2-deoxyribose-5-phosphate aldolase                                         | 91.436    | 0.009176473 |
| <i>deoB</i>    | phosphopentomutase                                                         | 267.740   | 4.16E-09    |
| <i>deoD</i>    | purine nucleoside phosphorylase                                            | 152.688   | 8.18E-06    |
| <i>yjyK</i>    | ABC transporter ATP-binding protein                                        | 218.333   | 3.03E-08    |
| <i>arcA</i>    | two-component response regulator ArcA                                      | 95.327    | 0.004367867 |
| <i>repA2</i>   | DNA replication (plasmid-encoded)                                          | 92.167    | 0.015097344 |
| <i>rlgA</i>    | putative integrase protein (plasmid-encoded)                               | 128.070   | 9.53E-05    |
| <i>PSLT046</i> | putative carbonic anhydrase (plasmid-encoded)                              | 124.258   | 0.000326829 |

<sup>1</sup> Fold change indicate expression in the infected Flight cultures above background (relative to uninfected cultures). Significance determined according to an FDR < 0.05. Log2-fold change values were converted to fold change.

Supplementary Table 10. Bacterial transcripts expressed in infected Ground HT-29 cultures<sup>1</sup>

| Gene           | Description                                                       | Fold Change*<br>(above background) | FDR        |
|----------------|-------------------------------------------------------------------|------------------------------------|------------|
| <i>dnaK</i>    | chaperone protein DnaK                                            | 259.173                            | 3.77E-09   |
| <i>aceE</i>    | pyruvate dehydrogenase decarboxylase subunit E1                   | 215.790                            | 1.11E-11   |
| <i>aceF</i>    | pyruvate dehydrogenase dihydrolipoyltransacetylase subunit E2     | 110.707                            | 1.08E-05   |
| <i>lpdA</i>    | pyruvate dehydrogenase lipoamide dehydrogenase subunit E3         | 102.768                            | 4.47E-05   |
| <i>rpsB</i>    | 30S ribosomal protein S2                                          | 79.529                             | 0.00152656 |
| <i>bamA</i>    | outer membrane protein assembly factor BamA                       | 43.233                             | 0.04234548 |
| <i>tig</i>     | trigger factor                                                    | 68.587                             | 0.00433008 |
| <i>clpX</i>    | ATP-dependent protease ATP-binding subunit ClpX                   | 83.002                             | 0.00123279 |
| <i>lon</i>     | Lon protease                                                      | 169.552                            | 1.60E-06   |
| <i>htpG</i>    | chaperone protein HtpG                                            | 154.799                            | 7.43E-06   |
| <i>fepA</i>    | outer membrane porin                                              | 51.367                             | 0.00983955 |
| <i>entF</i>    | enterobactin synthase subunit F                                   | 103.653                            | 1.72E-05   |
| <i>entE</i>    | 2,3-dihydroxybenzoate-AMP ligase                                  | 61.799                             | 0.0054494  |
| <i>ahpC</i>    | alkyl hydroperoxide reductase subunit C                           | 43.045                             | 0.04677683 |
| <i>gpmA</i>    | 2,3-bisphosphoglycerate-dependent phosphoglycerate mutase         | 78.391                             | 0.00017875 |
| <i>dps</i>     | DNA starvation/stationary phase protection protein                | 104.609                            | 0.00025543 |
| <i>ompX</i>    | outer membrane protease                                           | 58.760                             | 0.0044015  |
| <i>pflB</i>    | pyruvate formate lyase I                                          | 158.909                            | 3.88E-08   |
| <i>rpsA</i>    | 30S ribosomal protein S1                                          | 223.101                            | 5.30E-12   |
| <i>ompA</i>    | outer membrane protein A                                          | 212.325                            | 1.27E-11   |
| <i>STM1119</i> | NAD(P)H dehydrogenase                                             | 84.732                             | 0.01734099 |
| <i>grxB</i>    | glutaredoxin                                                      | 64.856                             | 0.00710134 |
| <i>gapA</i>    | glyceraldehyde-3-phosphate dehydrogenase                          | 29.341                             | 9.28E-18   |
| <i>thrS</i>    | threonine--tRNA ligase                                            | 46.743                             | 0.0328973  |
| <i>infC</i>    | translation initiation factor IF-3                                | 50.584                             | 0.01991171 |
| <i>sufB</i>    | cysteine desulfurase activator complex subunit SufB               | 100.646                            | 1.27E-05   |
| <i>sufD</i>    | cysteine desulfurase activator complex subunit SufD               | 103.540                            | 1.95E-05   |
| <i>lpp</i>     | major outer membrane lipoprotein                                  | 72.561                             | 0.00220372 |
| <i>pykF</i>    | pyruvate kinase                                                   | 54.819                             | 0.00827378 |
| <i>STM1513</i> | cytoplasmic protein                                               | 200.975                            | 6.33E-07   |
| <i>ompD</i>    | outer membrane porin protein OmpD                                 | 94.826                             | 0.00018353 |
| <i>STM1586</i> | hypothetical protein                                              | 73.936                             | 0.00056052 |
| <i>yciE</i>    | cytoplasmic protein                                               | 80.782                             | 0.03979437 |
| <i>STM1731</i> | catalase                                                          | 194.030                            | 6.42E-07   |
| <i>adhE</i>    | bifunctional acetaldehyde-CoA/alcohol dehydrogenase               | 74.320                             | 0.00039074 |
| <i>fliC</i>    | flagellin                                                         | 211.274                            | 3.86E-09   |
| <i>fbaB</i>    | fructose-bisphosphate aldolase                                    | 57.332                             | 0.01843163 |
| <i>cirA</i>    | catecholate siderophore receptor CirA                             | 152.389                            | 3.37E-08   |
| <i>ompC</i>    | outer membrane porin protein C                                    | 61.352                             | 0.00767944 |
| <i>gyrA</i>    | DNA gyrase subunit A                                              | 75.791                             | 0.00221468 |
| <i>ackA</i>    | acetate kinase                                                    | 43.144                             | 0.04551514 |
| <i>pta</i>     | phosphate acetyltransferase                                       | 87.497                             | 0.00038578 |
| <i>fabB</i>    | 3-oxoacyl-ACP synthase                                            | 46.774                             | 0.03190145 |
| <i>ptsI</i>    | phosphoenolpyruvate-protein phosphotransferase                    | 102.185                            | 8.31E-05   |
| <i>glyA</i>    | serine hydroxymethyltransferase                                   | 46.744                             | 0.0328973  |
| <i>rrlG</i>    | 23S ribosomal RNA                                                 | 30.158                             | 2.43E-52   |
| <i>clpB</i>    | chaperone protein ClpB                                            | 225.633                            | 2.42E-07   |
| <i>yfiA</i>    | translation inhibitor protein RaiA                                | 101.268                            | 0.00022094 |
| <i>grpE</i>    | heat shock protein GrpE                                           | 65.018                             | 0.00574178 |
| <i>iroB</i>    | glycosyl transferase                                              | 61.622                             | 0.00642321 |
| <i>iroC</i>    | ABC transporter ATP-binding protein                               | 50.764                             | 0.0169945  |
| <i>iroN</i>    | iron-enterobactin outer membrane transporter FepA                 | 162.958                            | 2.27E-10   |
| <i>ygaU</i>    | LysM domain/BON superfamily protein                               | 103.945                            | 0.00069547 |
| <i>alaS</i>    | alanine--tRNA ligase                                              | 46.634                             | 0.03582473 |
| <i>sitA</i>    | Fur regulated iron ABC transporter substrate-binding protein SitA | 65.066                             | 0.00510779 |
| <i>rpoS</i>    | RNA polymerase sigma factor RpoS                                  | 172.403                            | 3.49E-08   |
| <i>nlpD</i>    | Murein hydrolase activator NlpD                                   | 73.359                             | 0.00099118 |
| <i>eno</i>     | enolase                                                           | 177.415                            | 7.09E-11   |
| <i>fba</i>     | fructose-bisphosphate aldolase                                    | 126.071                            | 1.10E-06   |



|                |                                                |          |            |
|----------------|------------------------------------------------|----------|------------|
| <i>pgk</i>     | phosphoglycerate kinase                        | 84.830   | 0.00019867 |
| <i>tktA</i>    | transketolase                                  | 105.819  | 6.00E-05   |
| <i>speA</i>    | arginine decarboxylase                         | 75.516   | 0.00363269 |
| <i>rpoD</i>    | RNA polymerase sigma factor RpoD               | 79.403   | 0.00165141 |
| <i>rnpB</i>    | miscRNA                                        | 1051.758 | 6.70E-45   |
| <i>infB</i>    | translation initiation factor IF-2             | 53.986   | 0.01711276 |
| <i>hflB</i>    | ATP-dependent metalloprotease                  | 57.983   | 0.00889671 |
| <i>rrlD</i>    | 23S ribosomal RNA                              | 57.033   | 1.62E-65   |
| <i>rrsD</i>    | 16S ribosomal RNA                              | 7.622    | 0.0005445  |
| <i>rpoA</i>    | DNA-directed RNA polymerase subunit alpha      | 13.496   | 1.59E-05   |
| <i>rpsD</i>    | 30S ribosomal protein S4                       | 54.073   | 0.0160496  |
| <i>secY</i>    | preprotein translocase subunit SecY            | 39.312   | 9.28E-08   |
| <i>rplF</i>    | 50S ribosomal protein L6                       | 50.311   | 0.02413302 |
| <i>rplB</i>    | 50S ribosomal protein L2                       | 12.521   | 0.00796151 |
| <i>rplC</i>    | 50S ribosomal protein L3                       | 90.634   | 0.00046371 |
| <i>tuf</i>     | elongation factor Tu                           | 41.139   | 4.22E-09   |
| <i>fusA</i>    | elongation factor G                            | 272.067  | 4.14E-15   |
| <i>fkpA</i>    | FKBP-type peptidyl-prolyl cis-trans isomerase  | 72.161   | 0.00312084 |
| <i>glpD</i>    | glycerol-3-phosphate dehydrogenase             | 196.118  | 3.39E-08   |
| <i>prlC</i>    | oligopeptidase A                               | 90.460   | 0.00053022 |
| <i>treF</i>    | trehalase                                      | 85.994   | 0.00245147 |
| <i>atpA</i>    | F0F1 ATP synthase subunit alpha                | 76.737   | 0.00090433 |
| <i>rrlC</i>    | 23S ribosomal RNA                              | 79.605   | 4.85E-76   |
| <i>ilvC</i>    | ketol-acid reductoisomerase                    | 50.423   | 0.02154135 |
| <i>rrlA</i>    | 23S ribosomal RNA                              | 80.685   | 4.45E-74   |
| <i>STM4002</i> | cytoplasmic protein                            | 50.500   | 0.02144679 |
| <i>typA</i>    | GTP-binding elongation factor family protein   | 46.632   | 0.03535343 |
| <i>sodA</i>    | superoxide dismutase                           | 82.975   | 0.00129205 |
| <i>tpiA</i>    | triosephosphate isomerase                      | 50.403   | 0.02323298 |
| <i>hslU</i>    | ATP-dependent protease ATPase subunit HslU     | 79.628   | 0.00127907 |
| <i>rrlB</i>    | 23S ribosomal RNA                              | 91.438   | 3.51E-71   |
| <i>tuf</i>     | elongation factor Tu                           | 177.880  | 2.72E-09   |
| <i>rplA</i>    | 50S ribosomal protein L1                       | 57.664   | 0.01176427 |
| <i>rplJ</i>    | 50S ribosomal protein L10                      | 46.627   | 0.03582473 |
| <i>rpoB</i>    | DNA-directed RNA polymerase subunit beta       | 7.609    | 0.00901243 |
| <i>rpoC</i>    | DNA-directed RNA polymerase subunit beta'      | 105.009  | 4.16E-06   |
| <i>rrlE</i>    | 23S ribosomal RNA                              | 64.862   | 9.36E-58   |
| <i>pgi</i>     | glucose-6-phosphate isomerase                  | 46.626   | 0.03582473 |
| <i>STM4261</i> | inner membrane protein                         | 83.148   | 0.00102942 |
| <i>groES</i>   | co-chaperonin GroES                            | 53.747   | 0.02396165 |
| <i>groEL</i>   | chaperonin GroEL                               | 108.096  | 4.77E-24   |
| <i>vacB</i>    | ribonuclease R                                 | 46.767   | 0.03150487 |
| <i>STM4519</i> | NAD-dependent aldehyde dehydrogenase           | 133.018  | 5.10E-05   |
| <i>osmY</i>    | hyperosmotically inducible periplasmic protein | 172.709  | 2.01E-06   |
| <i>deoB</i>    | phosphopentomutase                             | 50.406   | 0.02183121 |
| <i>yjyK</i>    | ABC transporter ATP-binding protein            | 57.791   | 0.00984699 |

<sup>1</sup> Fold change indicates expression in the infected Ground cultures above background (relative to uninfected ground cultures/no bacteria). Significance determined according to an FDR < 0.05. Log2-fold change values were converted to fold change.



**Supplementary Table 11. Differential expression of bacterial transcripts between infected Flight and infected Ground HT-29 cultures<sup>1</sup>**

| Gene                           | Description                                                                                       | Fold Change (Flight/Ground) | FDR         |
|--------------------------------|---------------------------------------------------------------------------------------------------|-----------------------------|-------------|
| <b>Upregulated genes (328)</b> |                                                                                                   |                             |             |
| <i>STM1627</i>                 | alcohol dehydrogenase class III                                                                   | 316.889                     | 2.80E-09    |
| <i>gmd</i>                     | GDP-D-mannose dehydratase                                                                         | 308.772                     | 3.48E-09    |
| <i>STM1808</i>                 | cytoplasmic protein                                                                               | 217.826                     | 1.82E-07    |
| <i>fhuF</i>                    | ferric hydroximate transport ferric iron reductase                                                | 189.738                     | 1.39E-06    |
| <i>rcsA</i>                    | transcriptional regulator RcsA                                                                    | 164.704                     | 1.18E-05    |
| <i>manA</i>                    | mannose-6-phosphate isomerase                                                                     | 152.769                     | 3.66E-05    |
| <i>hisD</i>                    | histidinol dehydrogenase                                                                          | 144.730                     | 8.14E-05    |
| <i>yfbG</i>                    | bifunctional UDP-glucuronic acid decarboxylase/UDP-4-amino-4-deoxy-L-arabinose formyltransferase  | 144.229                     | 8.37E-05    |
| <i>secF</i>                    | preprotein translocase subunit SecF                                                               | 140.921                     | 0.000120443 |
| <i>ygjN</i>                    | periplasmic protein                                                                               | 132.380                     | 0.000295131 |
| <i>iroE</i>                    | alpha/beta superfamily hydrolase                                                                  | 128.235                     | 0.000460929 |
| <i>acrA</i>                    | acridine efflux pump                                                                              | 128.066                     | 0.000465064 |
| <i>ybhC</i>                    | pectinesterase                                                                                    | 124.005                     | 0.000722328 |
| <i>hisA</i>                    | 1-(5-phosphoribosyl)-5-[(5-phosphoribosylamino)methylideneamino]imidazole-4-carboxamide isomerase | 120.542                     | 0.001055764 |
| <i>ynhG</i>                    | murein L,D-transpeptidase                                                                         | 119.859                     | 0.001092805 |
| <i>udg</i>                     | UDP-glucose 6-dehydrogenase                                                                       | 119.774                     | 0.001094149 |
| <i>wcaG</i>                    | GDP-fucose synthetase                                                                             | 115.627                     | 0.001727127 |
| <i>sppA</i>                    | protease 4                                                                                        | 112.169                     | 0.00257034  |
| <i>miaA</i>                    | tRNA dimethylallyltransferase                                                                     | 111.308                     | 0.002681966 |
| <i>nemA</i>                    | N-ethylmaleimide reductase                                                                        | 107.246                     | 0.004053641 |
| <i>ydiJ</i>                    | oxidase                                                                                           | 103.619                     | 0.006004629 |
| <i>yfbE</i>                    | UDP-4-amino-4-deoxy-L-arabinose--oxoglutarate aminotransferase                                    | 103.445                     | 0.006050678 |
| <i>hisG</i>                    | ATP phosphoribosyltransferase                                                                     | 103.358                     | 0.006073851 |
| <i>pitA</i>                    | low-affinity phosphate transporter                                                                | 103.271                     | 0.006097123 |
| <i>aroC</i>                    | chorismate synthase                                                                               | 99.298                      | 0.009185762 |
| <i>STM2059</i>                 | hypothetical protein                                                                              | 99.123                      | 0.00927041  |
| <i>degQ</i>                    | serine endoprotease                                                                               | 95.501                      | 0.013655347 |
| <i>STM2542</i>                 | iron-sulfur cluster assembly scaffold protein                                                     | 95.501                      | 0.013655347 |
| <i>yjbH</i>                    | outer membrane lipoprotein                                                                        | 95.501                      | 0.013655347 |
| <i>fldA</i>                    | flavodoxin                                                                                        | 95.326                      | 0.013750618 |
| <i>ybhL</i>                    | permease                                                                                          | 91.620                      | 0.020045806 |
| <i>wecC</i>                    | UDP-N-acetyl-D-mannosamine dehydrogenase                                                          | 91.178                      | 0.02036155  |
| <i>maeB</i>                    | malic enzyme                                                                                      | 87.386                      | 0.029727132 |
| <i>rsxC</i>                    | electron transport complex protein RsxC                                                           | 86.675                      | 0.030546195 |
| <i>spr</i>                     | outer membrane lipoprotein                                                                        | 83.418                      | 0.042935119 |
| <i>yebG</i>                    | DNA damage-inducible protein                                                                      | 83.418                      | 0.042935119 |
| <i>yibN</i>                    | rhodanese-like sulfurtransferase                                                                  | 83.329                      | 0.042969066 |
| <i>yjeI</i>                    | outer membrane lipoprotein                                                                        | 83.329                      | 0.042969066 |
| <i>rna</i>                     | RNase I                                                                                           | 83.239                      | 0.043127763 |
| <i>mltC</i>                    | lytic murein transglycosylase C                                                                   | 83.150                      | 0.04324679  |
| <i>sfbA</i>                    | ABC transporter substrate-binding protein                                                         | 82.882                      | 0.043650908 |
| <i>wcaI</i>                    | glycosyl transferase                                                                              | 82.793                      | 0.04381618  |
| <i>ycfR</i>                    | outer membrane protein                                                                            | 69.254                      | 1.86E-10    |
| <i>hmpA</i>                    | bifunctional nitric oxide dioxygenase/dihydropteridine reductase                                  | 56.905                      | 6.61E-09    |
| <i>mipA</i>                    | murein-synthesizing holoenzymescaffolding protein                                                 | 54.184                      | 3.67E-07    |
| <i>sufA</i>                    | iron-sulfur cluster assembly scaffold protein                                                     | 46.927                      | 1.74E-06    |
| <i>aspC</i>                    | aspartate aminotransferase                                                                        | 45.257                      | 2.67E-06    |
| <i>aspS</i>                    | aspartate--tRNA ligase                                                                            | 44.364                      | 3.36E-06    |
| <i>accC</i>                    | acetyl-CoA carboxylase biotin carboxylase subunit                                                 | 41.277                      | 2.20E-07    |
| <i>fruA</i>                    | PTS system fructose-specific transporter subunit IIBC                                             | 38.652                      | 3.67E-07    |
| <i>mig-14</i>                  | transcriptional activator                                                                         | 37.162                      | 3.46E-05    |
| <i>exbB</i>                    | biopolymer transport protein ExbB                                                                 | 37.096                      | 3.50E-05    |
| <i>ytfN</i>                    | periplasmic protein                                                                               | 37.014                      | 3.58E-05    |
| <i>cydA</i>                    | cytochrome d terminal oxidase polypeptide subunit I                                               | 36.226                      | 6.06E-07    |

|                |                                                                              |        |             |
|----------------|------------------------------------------------------------------------------|--------|-------------|
| <i>recA</i>    | recombinase A                                                                | 35.954 | 6.40E-07    |
| <i>glnS</i>    | glutamine--tRNA ligase                                                       | 35.402 | 6.59E-05    |
| <i>tyrS</i>    | tyrosine--tRNA ligase                                                        | 34.832 | 8.32E-07    |
| <i>prc</i>     | tail-specific protease                                                       | 34.564 | 9.10E-05    |
| <i>nrdE</i>    | ribonucleotide-diphosphate reductase subunit alpha                           | 33.951 | 3.13E-16    |
| <i>ompF</i>    | outer membrane protein F                                                     | 33.539 | 1.14E-06    |
| <i>lpdT</i>    | LPS-assembly protein LptD                                                    | 29.336 | 3.68E-06    |
| <i>cfa</i>     | cyclopropane-fatty-acyl-phospholipid synthase                                | 29.004 | 0.001018088 |
| <i>STM0478</i> | small-conductance mechanosensitive channel                                   | 28.871 | 0.001051117 |
| <i>ydgH</i>    | periplasmic protein                                                          | 27.234 | 0.00223224  |
| <i>murC</i>    | UDP-N-acetylmuramate--L-alanine ligase                                       | 27.207 | 0.001828161 |
| <i>rne</i>     | ribonuclease E                                                               | 26.544 | 2.01E-06    |
| <i>foxA</i>    | ferrioxamine B receptor                                                      | 26.533 | 0.003126758 |
| <i>ycbL</i>    | metallo-beta-lactamase                                                       | 26.483 | 0.003166296 |
| <i>ndh</i>     | respiratory NADH dehydrogenase 2                                             | 26.219 | 2.20E-06    |
| <i>glyQ</i>    | glycine--tRNA ligase subunit alpha                                           | 25.699 | 0.004533637 |
| <i>polA</i>    | DNA polymerase I                                                             | 25.649 | 0.00459994  |
| <i>PSLT046</i> |                                                                              | 24.933 | 0.00645244  |
| <i>pheS</i>    | phenylalanine--tRNA ligase subunit alpha                                     | 24.083 | 0.009477749 |
| <i>STM2963</i> | flavodoxin                                                                   | 24.049 | 0.009565561 |
| <i>pheT</i>    | phenylalanine--tRNA ligase subunit beta                                      | 23.408 | 9.00E-07    |
| <i>nifS</i>    | cysteine desulfurase                                                         | 23.390 | 2.51E-06    |
| <i>tonB</i>    | transport protein TonB                                                       | 23.335 | 0.013655347 |
| <i>hisB</i>    | bifunctional imidazole glycerol-phosphate dehydratase/histidinol phosphatase | 23.267 | 0.013807237 |
| <i>ytfM</i>    | outer membrane protein                                                       | 23.250 | 0.013843091 |
| <i>prsA</i>    | ribose-phosphate pyrophosphokinase                                           | 23.062 | 5.06E-05    |
| <i>ptsG</i>    | PTS system glucose-specific transporter subunit IIBC                         | 22.959 | 5.27E-05    |
| <i>ihfA</i>    | integration host factor subunit alpha                                        | 22.503 | 0.019725055 |
| <i>aroG</i>    | 3-deoxy-7-phosphoheptulonate synthase                                        | 22.469 | 0.019858283 |
| <i>ycfJ</i>    | outer membrane lipoprotein                                                   | 22.469 | 0.019858283 |
| <i>nhaA</i>    | Na(+)/H(+) antiporter NhaA                                                   | 22.384 | 0.020233506 |
| <i>dld</i>     | D-lactate dehydrogenase                                                      | 21.756 | 0.02795979  |
| <i>fisY</i>    | signal recognition particle receptor FtsY                                    | 21.722 | 0.028063791 |
| <i>rfbM</i>    | mannose-1-phosphate guanylyltransferase                                      | 21.637 | 0.028666    |
| <i>yjgP</i>    | permease                                                                     | 21.637 | 0.028666    |
| <i>hisC</i>    | histidinol-phosphate aminotransferase                                        | 21.619 | 0.028748948 |
| <i>uvrD</i>    | DNA-dependent helicase II                                                    | 21.602 | 0.028864801 |
| <i>rpsF</i>    | 30S ribosomal protein S6                                                     | 21.585 | 0.028981133 |
| <i>lexA</i>    | LexA repressor                                                               | 20.873 | 0.040481006 |
| <i>gltX</i>    | glutamate--tRNA ligase                                                       | 20.856 | 0.040560398 |
| <i>fepA</i>    | outer membrane porin                                                         | 20.823 | 1.73E-13    |
| <i>yfhP</i>    | HTH-type transcriptional regulator IscR                                      | 20.657 | 6.70E-06    |
| <i>STM0636</i> | hypothetical protein                                                         | 20.496 | 1.61E-05    |
| <i>sufS</i>    | bifunctional cysteine desulfurase/selenocysteine lyase                       | 19.712 | 2.76E-08    |
| <i>sufC</i>    | ABC transporter ATP-binding protein                                          | 19.209 | 5.46E-08    |
| <i>cyaA</i>    | adenylate cyclase                                                            | 18.915 | 1.30E-05    |
| <i>STM0225</i> | chaperone protein Skp                                                        | 18.841 | 0.000627161 |
| <i>entB</i>    | 2,3-dihydro-2,3-dihydroxybenzoate synthetase                                 | 18.646 | 4.64E-06    |
| <i>lpxD</i>    | UDP-3-O-[3-hydroxymyristoyl] glucosamine N-acyltransferase                   | 18.581 | 4.08E-05    |
| <i>rseA</i>    | anti-sigma E factor RseA                                                     | 18.439 | 0.000818737 |
| <i>tpxB</i>    | dipeptide/tripeptide transporter permease A                                  | 18.430 | 0.000820857 |
| <i>fnr</i>     | fumarate/nitrate reduction transcriptional regulator                         | 18.279 | 4.85E-05    |
| <i>gpmA</i>    | 2,3-bisphosphoglycerate-dependent phosphoglycerate mutase                    | 18.071 | 1.11E-18    |
| <i>iroN</i>    | iron-enterobactin outer membrane transporter FepA                            | 17.573 | 1.37E-37    |
| <i>minD</i>    | ATPase MinD                                                                  | 17.562 | 0.00148469  |
| <i>ompX</i>    | outer membrane protease                                                      | 17.200 | 1.27E-11    |
| <i>adhE</i>    | bifunctional acetaldehyde-CoA/alcohol dehydrogenase                          | 17.114 | 8.36E-16    |
| <i>rplK</i>    | 50S ribosomal protein L11                                                    | 17.090 | 0.001809281 |
| <i>metK</i>    | methionine adenosyltransferase                                               | 16.699 | 3.41E-05    |
| <i>pykF</i>    | pyruvate kinase                                                              | 16.641 | 3.97E-10    |
| <i>STM4118</i> | phosphoethanolamine transferase CptA                                         | 16.632 | 0.002887509 |
| <i>guaB</i>    | inosine 5'-monophosphate dehydrogenase                                       | 16.396 | 4.03E-06    |
| <i>nrdF</i>    | ribonucleotide-diphosphate reductase subunit beta                            | 16.241 | 1.03E-05    |
| <i>udp</i>     | uridine phosphorylase                                                        | 16.214 | 0.003896256 |
| <i>serC</i>    | 3-phosphoserine/phosphohydroxythreonine aminotransferase                     | 16.204 | 0.003909336 |

|                |                                                                        |        |             |
|----------------|------------------------------------------------------------------------|--------|-------------|
| <i>metG</i>    | methionine--tRNA ligase                                                | 16.186 | 0.003942652 |
| <i>hisF</i>    | imidazole glycerol phosphate synthase subunit HisF                     | 16.168 | 0.003969222 |
| <i>guaA</i>    | GMP synthase                                                           | 15.899 | 2.14E-05    |
| <i>bamA</i>    | outer membrane protein assembly factor BamA                            | 15.869 | 2.36E-07    |
| <i>fhuA</i>    | ferrichrome outer membranereceptor/ transporter                        | 15.831 | 3.09E-05    |
| <i>rho</i>     | transcription termination factor Rho                                   | 15.823 | 3.09E-05    |
| <i>gidA</i>    | tRNA uridine 5-carboxymethylaminomethyl modification protein GidA      | 15.768 | 0.005382275 |
| <i>STM3663</i> | hypothetical protein                                                   | 15.768 | 0.005382275 |
| <i>ppiB</i>    | peptidyl-prolyl cis-trans isomerase                                    | 15.759 | 0.005401003 |
| <i>asnC</i>    | DNA-binding transcriptional regulator AsnC                             | 15.747 | 5.56E-05    |
| <i>cypD</i>    | peptidyl-prolyl cis-trans isomerase                                    | 15.437 | 0.00030171  |
| <i>zwf</i>     | glucose-6-phosphate 1-dehydrogenase                                    | 15.404 | 0.000307488 |
| <i>murE</i>    | UDP-N-acetylmuramoylalanyl-D-glutamate--2,6-diaminopimelate ligase     | 15.396 | 0.007164323 |
| <i>dapA</i>    | 4-hydroxy-tetrahydrodipicolinate synthase                              | 15.372 | 0.000313381 |
| <i>tehB</i>    | tellurite resistance protein TehB                                      | 15.267 | 0.007626992 |
| <i>leuS</i>    | leucine--tRNA ligase                                                   | 15.260 | 7.23E-05    |
| <i>galU</i>    | UTP--glucose-1-phosphate uridylyltransferase subunit GalU              | 15.222 | 4.08E-05    |
| <i>STM1586</i> | hypothetical protein                                                   | 15.087 | 1.46E-12    |
| <i>rpoC</i>    | DNA-directed RNA polymerase subunit beta'                              | 15.042 | 5.11E-20    |
| <i>lpxA</i>    | acyl-[acyl-carrier-protein]--UDP-N-acetylglucosamine O-acyltransferase | 14.877 | 0.010314657 |
| <i>rpoE</i>    | ECF RNA polymerase sigma factor RpoE                                   | 14.794 | 0.010677866 |
| <i>ppa</i>     | inorganic pyrophosphatase                                              | 14.738 | 9.80E-05    |
| <i>iroC</i>    | ABC transporter ATP-binding protein                                    | 14.652 | 1.19E-07    |
| <i>tolB</i>    | translocation protein TolB                                             | 14.516 | 0.000112525 |
| <i>ackA</i>    | acetate kinase                                                         | 14.483 | 1.67E-06    |
| <i>hupA</i>    | DNA-binding protein HU-alpha                                           | 14.424 | 0.014401528 |
| <i>mtlA</i>    | PTS system mannitol-specific transporter subunit IIABC                 | 14.359 | 0.014845065 |
| <i>yaeL</i>    | zinc metallopeptidase RseP                                             | 13.805 | 0.001001521 |
| <i>secA</i>    | preprotein translocase subunit SecA                                    | 13.796 | 0.001087146 |
| <i>hns</i>     | DNA-binding protein H-NS                                               | 13.715 | 3.43E-05    |
| <i>gyrB</i>    | DNA gyrase subunit B                                                   | 13.616 | 9.63E-05    |
| <i>yadF</i>    | carbonic anhydrase                                                     | 13.607 | 9.50E-05    |
| <i>ppc</i>     | phosphoenolpyruvate carboxylase                                        | 13.562 | 0.000219963 |
| <i>STM3898</i> | hypothetical protein                                                   | 13.526 | 0.02786076  |
| <i>eno</i>     | enolase                                                                | 13.477 | 2.31E-29    |
| <i>fabI</i>    | enoyl-ACP reductase FabI                                               | 13.374 | 0.000108154 |
| <i>sufB</i>    | cysteine desulfurase activator complex subunit SufB                    | 13.365 | 2.28E-15    |
| <i>pntA</i>    | NAD(P) transhydrogenase subunit alpha                                  | 13.328 | 6.28E-05    |
| <i>hflK</i>    | FtsH protease regulator HflK                                           | 13.073 | 0.000318304 |
| <i>parC</i>    | DNA topoisomerase IV subunit A                                         | 13.064 | 0.038567446 |
| <i>acpP</i>    | acyl carrier protein                                                   | 13.046 | 9.26E-05    |
| <i>lpxC</i>    | UDP-3-O-[3-hydroxymyristoyl] N-acetylglucosamine deacetylase           | 12.979 | 2.14E-05    |
| <i>efp</i>     | elongation factor P                                                    | 12.868 | 0.002459859 |
| <i>tolC</i>    | outer membrane channel protein                                         | 12.826 | 0.000391152 |
| <i>rpsI</i>    | 30S ribosomal protein S9                                               | 12.806 | 0.000396286 |
| <i>infC</i>    | translation initiation factor IF-3                                     | 12.763 | 2.82E-06    |
| <i>rpoB</i>    | DNA-directed RNA polymerase subunit beta                               | 12.688 | 7.74E-15    |
| <i>phoP</i>    | virulence transcriptional regulator PhoP                               | 12.582 | 0.003184597 |
| <i>bamB</i>    | uter membrane protein assembly factor BamB                             | 12.544 | 0.003235242 |
| <i>rfbF</i>    | glucose-1-phosphate cytidylyltransferase                               | 12.544 | 0.003235242 |
| <i>gcvT</i>    | glycine cleavage system aminomethyltransferase T                       | 12.519 | 0.003285715 |
| <i>nlpD</i>    | Murein hydrolase activator NlpD                                        | 12.371 | 8.57E-09    |
| <i>pgk</i>     | phosphoglycerate kinase                                                | 12.199 | 2.71E-10    |
| <i>pntB</i>    | NAD(P) transhydrogenase subunit beta                                   | 12.072 | 0.000737533 |
| <i>acrB</i>    | RND family acridine efflux pump                                        | 11.998 | 0.000135445 |
| <i>mdoG</i>    | glucan biosynthesis protein G                                          | 11.923 | 0.005727013 |
| <i>rfbG</i>    | CDP glucose 4,6-dehydratase                                            | 11.923 | 0.005727013 |
| <i>atpF</i>    | F0F1 ATP synthase subunit B                                            | 11.923 | 0.005090163 |
| <i>deoD</i>    | purine nucleoside phosphorylase                                        | 11.917 | 0.005741624 |
| <i>rpsH</i>    | 30S ribosomal protein S8                                               | 11.904 | 0.005782207 |
| <i>gnd</i>     | 6-phosphogluconate dehydrogenase                                       | 11.806 | 9.63E-05    |
| <i>STM4002</i> | cytoplasmic protein                                                    | 11.790 | 1.20E-05    |
| <i>valS</i>    | valine--tRNA ligase                                                    | 11.723 | 0.00015982  |

|                |                                                                               |        |             |
|----------------|-------------------------------------------------------------------------------|--------|-------------|
| <i>entE</i>    | 2,3-dihydroxybenzoate-AMP ligase                                              | 11.634 | 1.40E-06    |
| <i>rfbH</i>    | lipopolysaccharide biosynthesis protein RfbH                                  | 11.568 | 0.000177638 |
| <i>fabF</i>    | 3-oxoacyl-(acyl carrier protein) synthase II                                  | 11.510 | 0.000153222 |
| <i>hflB</i>    | ATP-dependent metalloprotease                                                 | 11.356 | 5.39E-06    |
| <i>relA</i>    | (P)ppGpp synthetase I                                                         | 11.000 | 0.013655347 |
| <i>entF</i>    | enterobactin synthase subunit F                                               | 10.991 | 4.43E-11    |
| <i>pyrG</i>    | CTP synthase                                                                  | 10.895 | 0.000232618 |
| <i>tsf</i>     | elongation factor Ts                                                          | 10.889 | 0.000149595 |
| <i>galF</i>    | UTP--glucose-1-phosphate uridylyltransferase subunit GalF                     | 10.830 | 0.002302554 |
| <i>sufD</i>    | cysteine desulfurase activator complex subunit SufD                           | 10.722 | 1.52E-10    |
| <i>proS</i>    | proline--tRNA ligase                                                          | 10.665 | 0.018687396 |
| <i>pykA</i>    | pyruvate kinase                                                               | 10.659 | 0.018754493 |
| <i>nlpB</i>    | outer membrane protein assembly factor BamC                                   | 10.610 | 0.002887509 |
| <i>fhuE</i>    | ferric-rhodotorulic acid outer membrane transporter                           | 10.599 | 0.000139218 |
| <i>tpiA</i>    | triosephosphate isomerase                                                     | 10.516 | 6.59E-05    |
| <i>atpA</i>    | F0F1 ATP synthase subunit alpha                                               | 10.506 | 5.30E-07    |
| <i>glyS</i>    | glycine--tRNA ligase subunit beta                                             | 10.411 | 0.001022793 |
| <i>iroB</i>    | glycosyl transferase                                                          | 10.405 | 1.40E-05    |
| <i>ssb</i>     | single-stranded DNA-binding protein                                           | 10.356 | 0.024775592 |
| <i>rrlG</i>    | 23S ribosomal RNA                                                             | 10.339 | 3.06E-28    |
| <i>cydB</i>    | cytochrome d terminal oxidase polypeptide subunit II                          | 10.299 | 0.000594873 |
| <i>glmS</i>    | glucosamine--fructose-6-phosphate aminotransferase                            | 10.234 | 0.0011649   |
| <i>nrdA</i>    | ribonucleotide-diphosphate reductase subunit alpha                            | 10.132 | 0.0042773   |
| <i>cpxA</i>    | sensory kinase CpxS                                                           | 10.085 | 0.032631898 |
| <i>sspA</i>    | stringent starvation protein A                                                | 10.060 | 0.033121656 |
| <i>STM0402</i> | thiol-alkyl hydroperoxide reductase                                           | 10.057 | 0.000370334 |
| <i>ynhA</i>    | cysteine desulfuration protein Sufe                                           | 10.041 | 0.03356713  |
| <i>hflC</i>    | FtsH protease regulator HflC                                                  | 9.822  | 0.001797188 |
| <i>rplO</i>    | 50S ribosomal protein L15                                                     | 9.773  | 0.000317817 |
| <i>crr</i>     | PTS system glucose-specific transporter subunit IIA                           | 9.766  | 0.000916026 |
| <i>ispG</i>    | 4-hydroxy-3-methylbut-2-en-1-yl diphosphate synthase (flavodoxin)             | 9.751  | 0.044081936 |
| <i>rpsD</i>    | 30S ribosomal protein S4                                                      | 9.745  | 0.000112525 |
| <i>pnp</i>     | polyribonucleotide nucleotidyltransferase                                     | 9.730  | 0.000474905 |
| <i>fba</i>     | fructose-bisphosphate aldolase                                                | 9.681  | 2.35E-11    |
| <i>fruF</i>    | bifunctional PTS system fructose-specific transporter subunit IIA/HPr protein | 9.669  | 0.000681852 |
| <i>cysK</i>    | cysteine synthase A                                                           | 9.658  | 0.007629004 |
| <i>ybiX</i>    | VirK-like protein                                                             | 9.638  | 0.007733603 |
| <i>rplL</i>    | 50S ribosomal protein L7/L12                                                  | 9.638  | 0.001018088 |
| <i>rnb</i>     | exoribonuclease II                                                            | 9.626  | 0.002203655 |
| <i>aceF</i>    | pyruvate dehydrogenase dihydrolipoyltransacetylase subunit E2                 | 9.599  | 2.27E-09    |
| <i>yidC</i>    | membrane protein insertase YidC                                               | 9.450  | 0.002649636 |
| <i>guaC</i>    | GMP reductase                                                                 | 9.416  | 0.002614779 |
| <i>ldhA</i>    | D-lactate dehydrogenase                                                       | 9.312  | 0.000737533 |
| <i>alaS</i>    | alanine--tRNA ligase                                                          | 9.283  | 0.00040408  |
| <i>rrlD</i>    | 23S ribosomal RNA                                                             | 9.234  | 1.55E-25    |
| <i>yhgF</i>    | RNase R                                                                       | 9.190  | 0.012773942 |
| <i>plsB</i>    | glycerol-3-phosphate acyltransferase                                          | 9.127  | 0.013482196 |
| <i>purA</i>    | adenylosuccinate synthetase                                                   | 9.080  | 0.001087146 |
| <i>nrdI</i>    | ribonucleotide reductase stimulatory protein                                  | 8.957  | 0.016667669 |
| <i>lpdA</i>    | pyruvate dehydrogenase lipoamide dehydrogenase subunit E3                     | 8.900  | 2.27E-07    |
| <i>cirA</i>    | catechololate siderophore receptor CirA                                       | 8.885  | 1.65E-12    |
| <i>entC</i>    | isochorismate synthase                                                        | 8.824  | 0.000774627 |
| <i>rplJ</i>    | 50S ribosomal protein L10                                                     | 8.823  | 0.000658385 |
| <i>ileS</i>    | isoleucine--tRNA ligase                                                       | 8.798  | 0.000971633 |
| <i>rrlC</i>    | 23S ribosomal RNA                                                             | 8.752  | 4.88E-25    |
| <i>pgi</i>     | glucose-6-phosphate isomerase                                                 | 8.748  | 0.000704738 |
| <i>trxA</i>    | thioredoxin                                                                   | 8.699  | 0.021752131 |
| <i>hscA</i>    | chaperone protein HscA                                                        | 8.685  | 0.022001935 |
| <i>tdh</i>     | L-threonine 3-dehydrogenase                                                   | 8.680  | 0.022076981 |
| <i>lepA</i>    | elongation factor 4                                                           | 8.670  | 0.022227912 |
| <i>trxB</i>    | thioredoxin reductase                                                         | 8.664  | 0.006105287 |
| <i>lpp</i>     | major outer membrane lipoprotein                                              | 8.617  | 7.23E-05    |
| <i>gapA</i>    | glyceraldehyde-3-phosphate dehydrogenase                                      | 8.544  | 1.13E-27    |
| <i>clpA</i>    | ATP-dependent Clp protease ATP-binding subunit                                | 8.542  | 0.001354768 |
| <i>rplP</i>    | 50S ribosomal protein L16                                                     | 8.526  | 0.00121169  |

|                |                                                                                                               |       |             |
|----------------|---------------------------------------------------------------------------------------------------------------|-------|-------------|
| <i>slyB</i>    | outer membrane lipoprotein SlyB                                                                               | 8.467 | 0.003193015 |
| <i>pta</i>     | phosphate acetyltransferase                                                                                   | 8.453 | 1.33E-05    |
| <i>infB</i>    | translation initiation factor IF-2                                                                            | 8.370 | 0.00068094  |
| <i>rrlA</i>    | 23S ribosomal RNA                                                                                             | 8.300 | 1.78E-23    |
| <i>pepN</i>    | aminopeptidase N                                                                                              | 8.290 | 0.009462405 |
| <i>surA</i>    | chaperone SurA                                                                                                | 8.253 | 0.036263219 |
| <i>yhgI</i>    | Fe/S biogenesis protein NfuA                                                                                  | 8.227 | 0.010017335 |
| <i>ydaA</i>    | universal stress protein E                                                                                    | 8.219 | 0.037095035 |
| <i>rplA</i>    | 50S ribosomal protein L1                                                                                      | 8.194 | 0.000658385 |
| <i>mltD</i>    | membrane-bound lytic murein transglycosylase D                                                                | 8.134 | 0.001397187 |
| <i>rplM</i>    | 50S ribosomal protein L13                                                                                     | 8.122 | 0.00196878  |
| <i>icdA</i>    | isocitrate dehydrogenase                                                                                      | 8.116 | 0.004685088 |
| <i>pepD</i>    | aminoacyl-histidine dipeptidase                                                                               | 8.112 | 0.001984094 |
| <i>rplN</i>    | 50S ribosomal protein L14                                                                                     | 7.975 | 0.005209193 |
| <i>talB</i>    | transaldolase B                                                                                               | 7.959 | 0.001647903 |
| <i>ompD</i>    | outer membrane porin protein OmpD                                                                             | 7.918 | 1.91E-05    |
| <i>ftsZ</i>    | cell division protein FtsZ                                                                                    | 7.900 | 0.003341487 |
| <i>lysS</i>    | lysine--tRNA ligase                                                                                           | 7.866 | 0.001777858 |
| <i>typA</i>    | GTP-binding elongation factor family protein                                                                  | 7.839 | 0.001687643 |
| <i>atpG</i>    | F0F1 ATP synthase subunit gamma                                                                               | 7.776 | 0.003853852 |
| <i>fes</i>     | enterochelin esterase                                                                                         | 7.739 | 0.002191765 |
| <i>ompA</i>    | outer membrane protein A                                                                                      | 7.707 | 1.33E-14    |
| <i>rrlE</i>    | 23S ribosomal RNA                                                                                             | 7.627 | 4.75E-22    |
| <i>pgm</i>     | phosphoglucomutase                                                                                            | 7.627 | 0.008214252 |
| <i>ftsK</i>    | DNA translocase FtsK                                                                                          | 7.606 | 0.003223793 |
| <i>ptsI</i>    | phosphoenolpyruvate-protein phosphotransferase                                                                | 7.551 | 1.99E-05    |
| <i>rplT</i>    | 50S ribosomal protein L20                                                                                     | 7.537 | 0.00257034  |
| <i>atpD</i>    | F0F1 ATP synthase subunit beta                                                                                | 7.509 | 0.000974367 |
| <i>rpsK</i>    | 30S ribosomal protein S11                                                                                     | 7.508 | 0.002947417 |
| <i>rpsG</i>    | 30S ribosomal protein S7                                                                                      | 7.503 | 0.002958376 |
| <i>pflB</i>    | pyruvate formate lyase I                                                                                      | 7.501 | 2.12E-09    |
| <i>gcvP</i>    | glycine dehydrogenase                                                                                         | 7.481 | 0.003660807 |
| <i>mukB</i>    | chromosome partition protein MukB                                                                             | 7.477 | 0.00535239  |
| <i>tuf</i>     | elongation factor Tu                                                                                          | 7.436 | 8.90E-11    |
| <i>aceE</i>    | pyruvate dehydrogenase decarboxylase subunit E1                                                               | 7.382 | 1.05E-13    |
| <i>rpoH</i>    | RNA polymerase sigma factor RpoH                                                                              | 7.332 | 0.003088597 |
| <i>trmD</i>    | tRNA (guanine-N(1)-)-methyltransferase                                                                        | 7.314 | 0.012127108 |
| <i>tktA</i>    | transketolase                                                                                                 | 7.286 | 2.74E-05    |
| <i>pfkA</i>    | 6-phosphofructokinase                                                                                         | 7.280 | 0.03193175  |
| <i>nlpI</i>    | lipoprotein NlpI                                                                                              | 7.234 | 0.00475342  |
| <i>fusA</i>    | elongation factor G                                                                                           | 7.202 | 6.37E-17    |
| <i>rrsD</i>    | 16S ribosomal RNA                                                                                             | 7.160 | 1.48E-09    |
| <i>rpsA</i>    | 30S ribosomal protein S1                                                                                      | 7.140 | 2.08E-13    |
| <i>ftsI</i>    | peptidoglycan synthase FtsI                                                                                   | 7.086 | 0.040560398 |
| <i>rrlB</i>    | 23S ribosomal RNA                                                                                             | 7.085 | 5.19E-20    |
| <i>lipA</i>    | lipoyl synthase                                                                                               | 7.047 | 0.042192797 |
| <i>STM4496</i> | DNA repair ATPase                                                                                             | 6.965 | 0.01887863  |
| <i>rplE</i>    | 50S ribosomal protein L5                                                                                      | 6.955 | 0.00338606  |
| <i>rplF</i>    | 50S ribosomal protein L6                                                                                      | 6.867 | 0.004011835 |
| <i>glmU</i>    | bifunctional N-acetylglucosamine-1-phosphate<br>uridylyltransferase/glucosamine-1-phosphate acetyltransferase | 6.791 | 0.023320366 |
| <i>tig</i>     | trigger factor                                                                                                | 6.779 | 0.002342885 |
| <i>rpsL</i>    | 30S ribosomal protein S12                                                                                     | 6.777 | 0.023624163 |
| <i>STM1190</i> | hypothetical protein                                                                                          | 6.593 | 0.009822483 |
| <i>rplC</i>    | 50S ribosomal protein L3                                                                                      | 6.494 | 0.00093819  |
| <i>feoB</i>    | ferrous iron transport protein B                                                                              | 6.477 | 0.011312967 |
| <i>rimM</i>    | ribosome maturation factor RimM                                                                               | 6.447 | 0.018849023 |
| <i>rplQ</i>    | 50S ribosomal protein L17                                                                                     | 6.378 | 0.00811738  |
| <i>cspE</i>    | RNA chaperone                                                                                                 | 6.292 | 0.045091566 |
| <i>rpsB</i>    | 30S ribosomal protein S2                                                                                      | 6.246 | 0.003047762 |
| <i>ahpC</i>    | alkyl hydroperoxide reductase subunit C                                                                       | 6.212 | 0.008488904 |
| <i>entA</i>    | 2,3-dihydro-2,3-dihydroxybenzoate dehydrogenase                                                               | 6.208 | 0.016049343 |
| <i>tuf</i>     | elongation factor Tu                                                                                          | 6.111 | 2.80E-09    |
| <i>rpoA</i>    | DNA-directed RNA polymerase subunit alpha                                                                     | 6.047 | 2.05E-07    |
| <i>dapD</i>    | 2,3,4,5-tetrahydropyridine-2,6-dicarboxylate N-succinyltransferase                                            | 6.034 | 0.032763913 |
| <i>rpoS</i>    | RNA polymerase sigma factor RpoS                                                                              | 5.852 | 3.17E-06    |

|                                |                                               |          |             |
|--------------------------------|-----------------------------------------------|----------|-------------|
| <i>rplU</i>                    | 50S ribosomal protein L21                     | 5.674    | 0.032468576 |
| <i>rnpB</i>                    | miscRNA                                       | 5.663    | 5.84E-20    |
| <i>deoB</i>                    | phosphopentomutase                            | 5.312    | 0.020485435 |
| <i>deaD</i>                    | ATP-dependent RNA helicase DeaD               | 5.203    | 0.043492603 |
| <i>vacB</i>                    | ribonuclease R                                | 5.027    | 0.031164167 |
| <i>ilvC</i>                    | ketol-acid reductoisomerase                   | 4.984    | 0.030896205 |
| <i>secY</i>                    | preprotein translocase subunit SecY           | 4.911    | 2.27E-05    |
| <i>rpsC</i>                    | 30S ribosomal protein S3                      | 4.882    | 0.013655347 |
| <i>rplD</i>                    | 50S ribosomal protein L4                      | 4.810    | 0.034275804 |
| <i>fkpA</i>                    | FKBP-type peptidyl-prolyl cis-trans isomerase | 4.513    | 0.047356231 |
| <i>rpsE</i>                    | 30S ribosomal protein S5                      | 4.501    | 0.049723074 |
| <i>sodA</i>                    | superoxide dismutase                          | 4.407    | 0.049997847 |
| <i>rplB</i>                    | 50S ribosomal protein L2                      | 4.342    | 0.023540741 |
| <i>fliC</i>                    | flagellin                                     | 4.155    | 0.000869877 |
| <i>glpD</i>                    | glycerol-3-phosphate dehydrogenase            | 3.939    | 0.004697577 |
| <i>groEL</i>                   | chaperonin GroEL                              | 3.176    | 1.38E-06    |
| <b>Downregulated genes (1)</b> |                                               |          |             |
| <i>STM1513</i>                 | cytoplasmic protein                           | -200.975 | 4.01E-07    |

<sup>1</sup> Fold change indicate expression of bacterial transcripts between the infected Flight cultures relative to infected Ground cultures. Significance determined according to an FDR < 0.05. Log2-fold change values were converted to fold change.
